# Supplementary material for: Corin Is Downregulated in Renal Ischemia/Reperfusion Injury and Is Associated with Delayed Graft Function after Kidney Transplantation
Source: Dis Markers. 2019 Jan 14;2019:9429323. doi: 10.1155/2019/9429323 (PMC6350528; doi:10.1155/2019/9429323)
Supplement: Supplementary Materials — Original data of microarray are available in Supplementary Material 1, and some clinical characteristics for individuals are available in Supplementary Material 2. [file 9429323.f1.zip]

Archive with 2 entries (2 files):
- Supplementary Material 1.xlsx
- Supplementary Material 2.xlsx
