# Supplementary material for: Corin Is Downregulated in Renal Ischemia/Reperfusion Injury and Is Associated with Delayed Graft Function after Kidney Transplantation
Source: Dis Markers. 2019 Jan 14;2019:9429323. doi: 10.1155/2019/9429323 (PMC6350528; doi:10.1155/2019/9429323)
Supplement: Supplementary Materials — Original data of microarray are available in Supplementary Material 1, and some clinical characteristics for individuals are available in Supplementary Material 2. [file 9429323.f1.zip › Supplementary Material 1.xlsx]

## Sheet: injury_VS_Sham_ctrl_p005fc2_m
Probe_Set_ID	pvalues	foldchange	i1_NS	i2_NS	i3_NS	i1_call	i2_call	i3_call	S1_NS	S2_NS	S3_NS	S1_call	S2_call	S3_call	Probe_Set_ID.1	GeneSymbol	Description	Accession	Gene_ID	Ensembl	Chromosome	Start	End	Strand	GO_Biological_Process_Term	GO_Cellular_Component_Term	GO_Molecular_Function_Term	Pathway
1415698_at	0.0174608	3.6026	10.6844	10.7815	9.70813	P	P	P	8.88365	8.22192	8.66757	P	P	P	1415698_at	Golm1	golgi membrane protein 1	NM_001035122 /// NM_027307	105348	ENSMUSG00000021556	chr13	59634628	59675785	-	0006997 // nucleus organization // inferred from mutant phenotype /// 0019216 // regulation of lipid metabolic process // inferred from mutant phenotype	0005794 // Golgi apparatus // inferred from direct assay /// 0005794 // Golgi apparatus // not recorded /// 0016020 // membrane // inferred from electronic annotation /// 0016021 // integral component of membrane // inferred from electronic annotation	0005515 // protein binding // inferred from electronic annotation	---
1415773_at	0.0366947	2.92038	11.8649	11.5346	10.6426	P	P	P	9.53499	10.18	9.87425	P	P	P	1415773_at	Ncl	nucleolin	NM_010880 /// XM_006529238	17975	ENSMUSG00000026234	chr1	86349626	86359388	-	0001525 // angiogenesis // not recorded /// 1901838 // positive regulation of transcription of nuclear large rRNA transcript from RNA polymerase I promoter // not recorded	0005634 // nucleus // inferred from direct assay /// 0005634 // nucleus // not recorded /// 0005654 // nucleoplasm // inferred from direct assay /// 0005730 // nucleolus // inferred from direct assay /// 0005730 // nucleolus // not recorded /// 0005737 // cytoplasm // inferred from electronic annotation /// 0005938 // cell cortex // not recorded /// 0030529 // ribonucleoprotein complex // not rec…	0000166 // nucleotide binding // inferred from electronic annotation /// 0003676 // nucleic acid binding // inferred from electronic annotation /// 0003677 // DNA binding // inferred from electronic annotation /// 0003723 // RNA binding // inferred from direct assay /// 0003723 // RNA binding // not recorded /// 0005515 // protein binding // inferred from physical interaction /// 0008022 // prote…	mRNA_processing_binding_Reactome // GenMAPP
1415795_at	0.0406812	2.35611	9.06948	8.70268	9.59476	P	P	P	7.84258	7.98489	7.9668	P	P	P	1415795_at	Spin1	spindlin 1	NM_001283028 /// NM_001283029 /// NM_001283030 /// NM_011462 /// NM_146043 /// XM_006516893 /// XM_006516894	20729	ENSMUSG00000021395	chr13	51100846	51152616	+	0007049 // cell cycle // inferred from electronic annotation /// 0007126 // meiotic nuclear division // inferred from electronic annotation /// 0007143 // female meiotic division // inferred by curator /// 0007275 // multicellular organismal development // inferred from electronic annotation /// 0007276 // gamete generation // inferred from electronic annotation /// 0009303 // rRNA transcription …	0005634 // nucleus // not recorded /// 0005730 // nucleolus // not recorded /// 0005737 // cytoplasm // inferred from electronic annotation /// 0005819 // spindle // inferred from direct assay /// 0005856 // cytoskeleton // inferred from electronic annotation	0003677 // DNA binding // inferred from electronic annotation /// 0035064 // methylated histone binding // not recorded	---
1415802_at	0.00101655	4.2367	12.7938	12.4752	12.3324	P	P	P	10.5697	10.6684	10.0899	P	P	P	1415802_at	Slc16a1	solute carrier family 16 (monocarboxylic acid transporters), member 1	NM_009196	20501	ENSMUSG00000032902 /// OTTMUSG00000022475	chr3	104638664	104657260	+	0006629 // lipid metabolic process // inferred from mutant phenotype /// 0006810 // transport // inferred from electronic annotation /// 0015711 // organic anion transport // inferred from electronic annotation /// 0015718 // monocarboxylic acid transport // inferred from electronic annotation /// 0032094 // response to food // inferred from mutant phenotype /// 0035873 // lactate transmembrane t…	0005739 // mitochondrion // inferred from direct assay /// 0005813 // centrosome // not recorded /// 0005886 // plasma membrane // not recorded /// 0005887 // integral component of plasma membrane // not recorded /// 0016020 // membrane // inferred from electronic annotation /// 0016021 // integral component of membrane // inferred from electronic annotation /// 0070062 // extracellular vesicular…	0005515 // protein binding // inferred from electronic annotation /// 0015293 // symporter activity // inferred from electronic annotation /// 0015355 // secondary active monocarboxylate transmembrane transporter activity // inferred from electronic annotation /// 0042803 // protein homodimerization activity // not recorded /// 0097159 // organic cyclic compound binding // not recorded	---
1415871_at	0.000821097	2.7314	10.0801	9.68759	9.9797	P	P	P	8.50506	8.62435	8.27578	P	P	P	1415871_at	Tgfbi	transforming growth factor, beta induced	NM_009369	21810	ENSMUSG00000035493	chr13	56609568	56639359	+	0001525 // angiogenesis // inferred from electronic annotation /// 0002062 // chondrocyte differentiation // inferred from electronic annotation /// 0007155 // cell adhesion // inferred from direct assay /// 0030198 // extracellular matrix organization // inferred from direct assay	0005576 // extracellular region // inferred from electronic annotation /// 0005578 // proteinaceous extracellular matrix // inferred from direct assay /// 0005604 // basement membrane // not recorded /// 0005615 // extracellular space // inferred from direct assay /// 0031012 // extracellular matrix // not recorded /// 0070062 // extracellular vesicular exosome // not recorded	0005515 // protein binding // inferred from electronic annotation /// 0050840 // extracellular matrix binding // inferred from direct assay	---
1415891_at	0.0177806	0.495537	12.3781	12.1025	12.7545	P	P	P	13.5384	13.5301	13.2635	P	P	P	1415891_at	Suclg1	succinate-CoA ligase, GDP-forming, alpha subunit	NM_019879	56451	ENSMUSG00000052738 /// OTTMUSG00000023469	chr6	73248381	73276907	+	0006099 // tricarboxylic acid cycle // not recorded /// 0006104 // succinyl-CoA metabolic process // not recorded /// 0006105 // succinate metabolic process // not recorded /// 0008152 // metabolic process // inferred from electronic annotation	0005737 // cytoplasm // inferred from electronic annotation /// 0005739 // mitochondrion // inferred from direct assay /// 0005739 // mitochondrion // not recorded /// 0005743 // mitochondrial inner membrane // inferred from direct assay /// 0005886 // plasma membrane // inferred from electronic annotation /// 0043234 // protein complex // not recorded /// 0045244 // succinate-CoA ligase complex …	0000166 // nucleotide binding // inferred from electronic annotation /// 0003824 // catalytic activity // inferred from electronic annotation /// 0003878 // ATP citrate synthase activity // inferred from electronic annotation /// 0004775 // succinate-CoA ligase (ADP-forming) activity // not recorded /// 0004776 // succinate-CoA ligase (GDP-forming) activity // not recorded /// 0005525 // GTP bind…	Krebs-TCA_Cycle // GenMAPP
1415893_at	0.0394173	8.1921	7.4301	7.24933	6.98975	P	P	P	3.93567	5.0795	2.59056	A	A	A	1415893_at	Sgpl1	sphingosine phosphate lyase 1	NM_009163 /// XM_006513402 /// XM_006513403 /// XM_006513404	20397	ENSMUSG00000020097 /// OTTMUSG00000031946	chr10	61098641	61146333	-	0001553 // luteinization // inferred from mutant phenotype /// 0001570 // vasculogenesis // inferred from mutant phenotype /// 0001822 // kidney development // inferred from mutant phenotype /// 0006629 // lipid metabolic process // inferred from electronic annotation /// 0006631 // fatty acid metabolic process // inferred from sequence or structural similarity /// 0006665 // sphingolipid metabol…	0005783 // endoplasmic reticulum // not recorded /// 0005789 // endoplasmic reticulum membrane // inferred from electronic annotation /// 0016020 // membrane // inferred from electronic annotation /// 0016021 // integral component of membrane // inferred from electronic annotation	0003824 // catalytic activity // inferred from electronic annotation /// 0005515 // protein binding // inferred from electronic annotation /// 0008117 // sphinganine-1-phosphate aldolase activity // not recorded /// 0016829 // lyase activity // inferred from electronic annotation /// 0016831 // carboxy-lyase activity // inferred from electronic annotation /// 0030170 // pyridoxal phosphate bindin…	---
1415899_at	0.0205035	9.20591	9.27685	9.20287	11.0375	P	P	P	6.20456	7.0142	7.29187	A	A	A	1415899_at	Junb	jun B proto-oncogene	NM_008416	16477	ENSMUSG00000052837	chr8	84976909	84978748	-	0001570 // vasculogenesis // inferred from mutant phenotype /// 0001649 // osteoblast differentiation // inferred from mutant phenotype /// 0001701 // in utero embryonic development // inferred from mutant phenotype /// 0001829 // trophectodermal cell differentiation // inferred from direct assay /// 0001829 // trophectodermal cell differentiation // inferred from mutant phenotype /// 0006351 // …	0005634 // nucleus // not recorded	0000977 // RNA polymerase II regulatory region sequence-specific DNA binding // inferred from direct assay /// 0003677 // DNA binding // inferred from direct assay /// 0003677 // DNA binding // not recorded /// 0003690 // double-stranded DNA binding // not recorded /// 0003700 // sequence-specific DNA binding transcription factor activity // not recorded /// 0005515 // protein binding // inferred…	---
1415916_a_at	0.00192671	0.464486	11.5412	11.7887	11.7262	P	P	P	12.9878	12.7615	12.612	P	P	P	1415916_a_at	Mthfd1	methylenetetrahydrofolate dehydrogenase (NADP+ dependent), methenyltetrahydrofolate cyclohydrolase, formyltetrahydrofolate synthase	NM_138745	108156	ENSMUSG00000021048	chr12	76255237	76319803	+	0000105 // histidine biosynthetic process // inferred from electronic annotation /// 0006164 // purine nucleotide biosynthetic process // inferred from electronic annotation /// 0006730 // one-carbon metabolic process // not recorded /// 0008152 // metabolic process // inferred from electronic annotation /// 0008652 // cellular amino acid biosynthetic process // inferred from electronic annotatio…	0005737 // cytoplasm // inferred from electronic annotation /// 0005739 // mitochondrion // inferred from direct assay /// 0005829 // cytosol // not recorded /// 0070062 // extracellular vesicular exosome // not recorded	0000166 // nucleotide binding // inferred from electronic annotation /// 0003824 // catalytic activity // inferred from electronic annotation /// 0004329 // formate-tetrahydrofolate ligase activity // not recorded /// 0004477 // methenyltetrahydrofolate cyclohydrolase activity // not recorded /// 0004488 // methylenetetrahydrofolate dehydrogenase (NADP+) activity // not recorded /// 0005524 // AT…	---
1415917_at	0.0041146	0.473232	10.4884	10.8911	10.8251	P	P	P	11.793	11.9519	11.7194	P	P	P	1415917_at	Mthfd1	methylenetetrahydrofolate dehydrogenase (NADP+ dependent), methenyltetrahydrofolate cyclohydrolase, formyltetrahydrofolate synthase	NM_138745	108156	ENSMUSG00000021048	chr12	76255237	76319803	+	0000105 // histidine biosynthetic process // inferred from electronic annotation /// 0006164 // purine nucleotide biosynthetic process // inferred from electronic annotation /// 0006730 // one-carbon metabolic process // not recorded /// 0008152 // metabolic process // inferred from electronic annotation /// 0008652 // cellular amino acid biosynthetic process // inferred from electronic annotatio…	0005737 // cytoplasm // inferred from electronic annotation /// 0005739 // mitochondrion // inferred from direct assay /// 0005829 // cytosol // not recorded /// 0070062 // extracellular vesicular exosome // not recorded	0000166 // nucleotide binding // inferred from electronic annotation /// 0003824 // catalytic activity // inferred from electronic annotation /// 0004329 // formate-tetrahydrofolate ligase activity // not recorded /// 0004477 // methenyltetrahydrofolate cyclohydrolase activity // not recorded /// 0004488 // methylenetetrahydrofolate dehydrogenase (NADP+) activity // not recorded /// 0005524 // AT…	---
1415926_at	0.0158583	2.25138	9.78765	9.38672	10.1142	P	P	P	8.54435	8.45378	8.84001	P	P	P	1415926_at	Nup62	nucleoporin 62	NM_053074	18226	ENSMUSG00000043858 /// OTTMUSG00000021116	chr7	44816104	44831834	+	0006351 // transcription, DNA-templated // not recorded /// 0006810 // transport // inferred from electronic annotation /// 0007166 // cell surface receptor signaling pathway // not recorded /// 0007569 // cell aging // inferred from direct assay /// 0008219 // cell death // not recorded /// 0008285 // negative regulation of cell proliferation // inferred from mutant phenotype /// 0008285 // nega…	0000922 // spindle pole // inferred from electronic annotation /// 0005634 // nucleus // inferred from electronic annotation /// 0005635 // nuclear envelope // not recorded /// 0005643 // nuclear pore // inferred from direct assay /// 0005643 // nuclear pore // not recorded /// 0005737 // cytoplasm // inferred from electronic annotation /// 0005764 // lysosome // inferred from electronic annotati…	0001716 // L-amino-acid oxidase activity // inferred from electronic annotation /// 0005515 // protein binding // inferred from physical interaction /// 0016491 // oxidoreductase activity // inferred from electronic annotation /// 0017056 // structural constituent of nuclear pore // inferred from electronic annotation /// 0030159 // receptor signaling complex scaffold activity // not recorded ///…	---
1415935_at	0.0334892	0.338589	7.98127	7.87483	6.84417	P	P	P	9.41728	8.95254	9.22821	P	P	P	1415935_at	Smoc2	SPARC related modular calcium binding 2	NM_022315 /// XM_006524777	64074	ENSMUSG00000023886	chr17	14279505	14404812	+	0007165 // signal transduction // inferred from electronic annotation /// 0010811 // positive regulation of cell-substrate adhesion // inferred from direct assay /// 0030198 // extracellular matrix organization // inferred from direct assay	0005576 // extracellular region // inferred from electronic annotation /// 0005578 // proteinaceous extracellular matrix // inferred from electronic annotation /// 0005604 // basement membrane // inferred from direct assay /// 0005614 // interstitial matrix // inferred from direct assay /// 0031012 // extracellular matrix // inferred from direct assay	0005509 // calcium ion binding // inferred from electronic annotation /// 0005515 // protein binding // inferred from electronic annotation /// 0005539 // glycosaminoglycan binding // inferred from direct assay /// 0008201 // heparin binding // inferred from direct assay /// 0046872 // metal ion binding // inferred from electronic annotation	---
1415943_at	0.00774506	3.03179	10.1926	9.84577	9.51303	P	P	P	8.40129	8.2865	8.13007	P	P	P	1415943_at	Sdc1	syndecan 1	NM_011519 /// XM_006515045 /// XM_006515046	20969	ENSMUSG00000020592 /// OTTMUSG00000033390	chr12	8771360	8793711	+	0001657 // ureteric bud development // inferred from electronic annotation /// 0006954 // inflammatory response // not recorded /// 0009636 // response to toxic substance // inferred from electronic annotation /// 0010033 // response to organic substance // inferred from electronic annotation /// 0042060 // wound healing // inferred from electronic annotation /// 0042476 // odontogenesis // infer…	0005576 // extracellular region // inferred from electronic annotation /// 0005737 // cytoplasm // not recorded /// 0005796 // Golgi lumen // traceable author statement /// 0005925 // focal adhesion // not recorded /// 0009897 // external side of plasma membrane // inferred from direct assay /// 0009986 // cell surface // inferred from direct assay /// 0016020 // membrane // inferred from electro…	0001948 // glycoprotein binding // inferred from physical interaction /// 0005515 // protein binding // inferred from electronic annotation /// 0008022 // protein C-terminus binding // not recorded /// 0008092 // cytoskeletal protein binding // inferred from electronic annotation	---
1415944_at	0.00132832	2.07302	8.45852	8.37693	8.13445	P	P	P	7.20072	7.1825	7.43665	P	M	P	1415944_at	Sdc1	syndecan 1	NM_011519 /// XM_006515045 /// XM_006515046	20969	ENSMUSG00000020592 /// OTTMUSG00000033390	chr12	8771360	8793711	+	0001657 // ureteric bud development // inferred from electronic annotation /// 0006954 // inflammatory response // not recorded /// 0009636 // response to toxic substance // inferred from electronic annotation /// 0010033 // response to organic substance // inferred from electronic annotation /// 0042060 // wound healing // inferred from electronic annotation /// 0042476 // odontogenesis // infer…	0005576 // extracellular region // inferred from electronic annotation /// 0005737 // cytoplasm // not recorded /// 0005796 // Golgi lumen // traceable author statement /// 0005925 // focal adhesion // not recorded /// 0009897 // external side of plasma membrane // inferred from direct assay /// 0009986 // cell surface // inferred from direct assay /// 0016020 // membrane // inferred from electro…	0001948 // glycoprotein binding // inferred from physical interaction /// 0005515 // protein binding // inferred from electronic annotation /// 0008022 // protein C-terminus binding // not recorded /// 0008092 // cytoskeletal protein binding // inferred from electronic annotation	---
1415949_at	0.0280547	2.26684	13.6248	13.8089	13	P	P	P	12.1949	12.5363	12.2553	P	P	P	1415949_at	Cpe	carboxypeptidase E	NM_013494	12876	ENSMUSG00000037852	chr8	64592541	64693186	-	0003214 // cardiac left ventricle morphogenesis // not recorded /// 0006508 // proteolysis // inferred from mutant phenotype /// 0006518 // peptide metabolic process // not recorded /// 0016485 // protein processing // not recorded /// 0030070 // insulin processing // inferred from mutant phenotype /// 0030070 // insulin processing // not recorded /// 0034230 // enkephalin processing // not recor…	0005576 // extracellular region // not recorded /// 0005615 // extracellular space // not recorded /// 0005794 // Golgi apparatus // not recorded /// 0016020 // membrane // inferred from electronic annotation /// 0030141 // secretory granule // not recorded /// 0030425 // dendrite // not recorded /// 0030658 // transport vesicle membrane // inferred from electronic annotation /// 0030667 // secre…	0004180 // carboxypeptidase activity // inferred from mutant phenotype /// 0004180 // carboxypeptidase activity // not recorded /// 0004181 // metallocarboxypeptidase activity // inferred from electronic annotation /// 0008233 // peptidase activity // inferred from electronic annotation /// 0008237 // metallopeptidase activity // inferred from electronic annotation /// 0008270 // zinc ion binding…	---
1415985_at	0.0227471	2.02056	10.8884	10.9651	10.4195	P	P	P	9.82205	9.78083	9.6803	P	P	P	1415985_at	Sf3b3	splicing factor 3b, subunit 3	NM_133953 /// XM_006530518 /// XM_006530519 /// XM_006530520	101943	ENSMUSG00000033732	chr8	110810234	110846800	-	0006397 // mRNA processing // inferred from electronic annotation /// 0008380 // RNA splicing // inferred from electronic annotation	0005634 // nucleus // inferred from electronic annotation /// 0005681 // spliceosomal complex // inferred from electronic annotation /// 0005689 // U12-type spliceosomal complex // not recorded /// 0071013 // catalytic step 2 spliceosome // not recorded	0003676 // nucleic acid binding // inferred from electronic annotation /// 0005515 // protein binding // inferred from electronic annotation	---
1415988_at	0.0239254	2.5191	7.06206	6.91741	7.76338	P	P	P	6.18548	5.87412	5.80344	A	P	A	1415988_at	Hdlbp	high density lipoprotein (HDL) binding protein	NM_133808 /// XM_006529073 /// XM_006529074 /// XM_006529075 /// XM_006529076 /// XM_006529077	110611	ENSMUSG00000034088	chr1	93405939	93478799	-	0006629 // lipid metabolic process // inferred from electronic annotation /// 0006810 // transport // inferred from electronic annotation /// 0006869 // lipid transport // inferred from electronic annotation /// 0008202 // steroid metabolic process // inferred from electronic annotation /// 0008203 // cholesterol metabolic process // inferred from electronic annotation	0005634 // nucleus // inferred from electronic annotation /// 0005737 // cytoplasm // not recorded /// 0034364 // high-density lipoprotein particle // inferred from electronic annotation	0003723 // RNA binding // inferred from electronic annotation /// 0044822 // poly(A) RNA binding // not recorded	---
1416004_at	0.00044672	3.04156	13.1508	13.0757	13.0192	P	P	P	11.6135	11.4677	11.3401	P	P	P	1416004_at	Ywhah	tyrosine 3-monooxygenase/tryptophan 5-monooxygenase activation protein, eta polypeptide	NM_011738	22629	ENSMUSG00000018965 /// OTTMUSG00000016346	chr5	33018842	33027966	+	0002028 // regulation of sodium ion transport // not recorded /// 0002028 // regulation of sodium ion transport // inferred from sequence or structural similarity /// 0006713 // glucocorticoid catabolic process // not recorded /// 0006886 // intracellular protein transport // inferred from direct assay /// 0007010 // cytoskeleton organization // non-traceable author statement /// 0007088 // regul…	0005737 // cytoplasm // inferred from direct assay /// 0005829 // cytosol // traceable author statement /// 0005886 // plasma membrane // not recorded /// 0014704 // intercalated disc // inferred by curator /// 0030659 // cytoplasmic vesicle membrane // traceable author statement /// 0070062 // extracellular vesicular exosome // not recorded	0003779 // actin binding // inferred from direct assay /// 0005515 // protein binding // inferred from physical interaction /// 0017080 // sodium channel regulator activity // not recorded /// 0017080 // sodium channel regulator activity // inferred from sequence or structural similarity /// 0019899 // enzyme binding // not recorded /// 0019904 // protein domain specific binding // inferred from …	Calcium_regulation_in_cardiac_cells // GenMAPP /// Smooth_muscle_contraction // GenMAPP
1416023_at	3.03859e-05	0.308951	9.85415	9.9474	10.057	P	P	P	11.6002	11.5885	11.7547	P	P	P	1416023_at	Fabp3	fatty acid binding protein 3, muscle and heart	NM_010174	14077	ENSMUSG00000028773 /// ENSMUSG00000056366 /// OTTMUSG00000009558	chr4	130308643	130315459	+	0006656 // phosphatidylcholine biosynthetic process // inferred from genetic interaction /// 0006810 // transport // inferred from electronic annotation /// 0015909 // long-chain fatty acid transport // not recorded /// 0042632 // cholesterol homeostasis // inferred from mutant phenotype /// 0044539 // long-chain fatty acid import // inferred from mutant phenotype /// 0046320 // regulation of fat…	0005737 // cytoplasm // not recorded /// 0005829 // cytosol // not recorded /// 0005829 // cytosol // traceable author statement /// 0016528 // sarcoplasm // not recorded /// 0070062 // extracellular vesicular exosome // not recorded	0005215 // transporter activity // inferred from electronic annotation /// 0005324 // long-chain fatty acid transporter activity // not recorded /// 0005504 // fatty acid binding // not recorded /// 0008092 // cytoskeletal protein binding // not recorded /// 0008289 // lipid binding // inferred from electronic annotation /// 0036041 // long-chain fatty acid binding // not recorded /// 0050543 // …	---
1416025_at	0.0358294	7.70859	12.9427	13.6302	11.406	P	P	P	9.33882	10.3776	10.0229	P	P	P	1416025_at	Fgg	fibrinogen gamma chain	NM_133862 /// XM_006502421	99571	ENSMUSG00000033860	chr3	83007743	83015054	+	0007160 // cell-matrix adhesion // not recorded /// 0007165 // signal transduction // inferred from electronic annotation /// 0007596 // blood coagulation // inferred from electronic annotation /// 0007599 // hemostasis // inferred from electronic annotation /// 0030168 // platelet activation // inferred from electronic annotation /// 0034116 // positive regulation of heterotypic cell-cell adhesi…	0005576 // extracellular region // inferred from electronic annotation /// 0005577 // fibrinogen complex // not recorded /// 0005615 // extracellular space // not recorded /// 0005737 // cytoplasm // not recorded /// 0005938 // cell cortex // inferred from direct assay /// 0009897 // external side of plasma membrane // not recorded /// 0009986 // cell surface // not recorded /// 0031091 // platel…	0005102 // receptor binding // not recorded /// 0005198 // structural molecule activity // not recorded /// 0030674 // protein binding, bridging // inferred from electronic annotation /// 0046872 // metal ion binding // inferred from electronic annotation /// 0050839 // cell adhesion molecule binding // not recorded	---
1416029_at	0.0416869	2.77099	9.75958	9.91006	10.8881	P	P	P	9.09332	8.5572	8.71793	P	P	P	1416029_at	Klf10	Kruppel-like factor 10	NM_001289471 /// NM_013692 /// XM_006520046 /// XM_006520047	21847	ENSMUSG00000037465	chr15	38294410	38300709	-	0006351 // transcription, DNA-templated // inferred from electronic annotation /// 0006355 // regulation of transcription, DNA-templated // inferred from mutant phenotype /// 0030282 // bone mineralization // inferred from mutant phenotype /// 0035019 // somatic stem cell maintenance // inferred from direct assay /// 0042127 // regulation of cell proliferation // inferred from electronic annotati…	0005634 // nucleus // inferred from electronic annotation	0003676 // nucleic acid binding // inferred from electronic annotation /// 0003677 // DNA binding // inferred from sequence or structural similarity /// 0005515 // protein binding // inferred from electronic annotation /// 0046872 // metal ion binding // inferred from electronic annotation	---
1416039_x_at	0.00117913	6.52051	12.7113	12.0945	11.9545	P	P	P	9.13643	9.93457	9.58202	P	P	P	1416039_x_at	Cyr61	cysteine rich protein 61	NM_010516	16007	ENSMUSG00000028195	chr3	145646973	145649985	-	0001558 // regulation of cell growth // inferred from electronic annotation /// 0001649 // osteoblast differentiation // inferred from genetic interaction /// 0001934 // positive regulation of protein phosphorylation // not recorded /// 0002041 // intussusceptive angiogenesis // inferred from mutant phenotype /// 0003181 // atrioventricular valve morphogenesis // inferred from mutant phenotype //…	0005576 // extracellular region // inferred from electronic annotation	0005178 // integrin binding // inferred from direct assay /// 0005515 // protein binding // inferred from electronic annotation /// 0005520 // insulin-like growth factor binding // inferred from electronic annotation /// 0008201 // heparin binding // inferred from electronic annotation /// 0019838 // growth factor binding // inferred from electronic annotation /// 0050840 // extracellular matrix …	---
1416044_at	0.00403161	2.4505	10.8436	10.493	10.9021	P	P	P	9.30153	9.26084	9.77214	P	P	P	1416044_at	Flii	flightless I homolog (Drosophila)	NM_022009 /// XM_006532190	14248	ENSMUSG00000002812 /// OTTMUSG00000007748	chr11	60714125	60727265	-	0006351 // transcription, DNA-templated // inferred from electronic annotation /// 0006355 // regulation of transcription, DNA-templated // inferred from electronic annotation /// 0007275 // multicellular organismal development // inferred from mutant phenotype /// 0030036 // actin cytoskeleton organization // traceable author statement /// 0051014 // actin filament severing // traceable author s…	0005634 // nucleus // not recorded /// 0005737 // cytoplasm // not recorded /// 0005813 // centrosome // inferred from electronic annotation /// 0005815 // microtubule organizing center // not recorded /// 0005856 // cytoskeleton // inferred from electronic annotation /// 0005925 // focal adhesion // inferred from electronic annotation /// 0030054 // cell junction // inferred from electronic anno…	0003779 // actin binding // inferred from electronic annotation /// 0005515 // protein binding // inferred from physical interaction	---
1416048_at	0.0147882	2.27379	10.7187	10.3194	10.9668	P	P	P	9.48082	9.38272	9.64605	P	P	P	1416048_at	Phc2	polyhomeotic-like 2 (Drosophila)	NM_001195083 /// NM_001195130 /// NM_018774 /// XM_006503234 /// XM_006503235 /// XM_006503236 /// XM_006503237 /// XM_006503238 /// XM_006537011 /// XR_376334	54383	ENSMUSG00000028796 /// OTTMUSG00000009456	chr4	128704995	128752874	+	0007275 // multicellular organismal development // inferred from electronic annotation /// 0007283 // spermatogenesis // inferred from genetic interaction	0000792 // heterochromatin // inferred from direct assay /// 0005634 // nucleus // inferred from direct assay /// 0005634 // nucleus // not recorded /// 0031519 // PcG protein complex // inferred from direct assay /// 0031519 // PcG protein complex // not recorded /// 0035102 // PRC1 complex // not recorded	0003677 // DNA binding // inferred from electronic annotation /// 0005515 // protein binding // inferred from physical interaction /// 0008270 // zinc ion binding // inferred from electronic annotation /// 0043565 // sequence-specific DNA binding // inferred from electronic annotation /// 0046872 // metal ion binding // inferred from electronic annotation	---
1416067_at	0.0072975	4.2545	12.3776	11.6431	12.3705	P	P	P	10.2044	9.89569	10.1225	P	P	P	1416067_at	Ifrd1	interferon-related developmental regulator 1	NM_013562	15982	ENSMUSG00000001627 /// OTTMUSG00000035474	chr12	40203128	40223173	-	0007275 // multicellular organismal development // inferred from electronic annotation /// 0007527 // adult somatic muscle development // inferred from mutant phenotype /// 0030154 // cell differentiation // inferred from electronic annotation /// 0042692 // muscle cell differentiation // inferred from mutant phenotype	0005634 // nucleus // inferred from direct assay	0005488 // binding // inferred from electronic annotation	---
1416075_at	0.0353954	2.17817	9.29612	9.26338	10.0193	P	P	P	8.43221	8.28778	8.60462	P	P	P	1416075_at	Sav1	salvador homolog 1 (Drosophila)	NM_022028	64010	ENSMUSG00000021067	chr12	69965011	69987020	-	0001942 // hair follicle development // inferred from mutant phenotype /// 0007165 // signal transduction // inferred from electronic annotation /// 0030216 // keratinocyte differentiation // inferred from genetic interaction /// 0030216 // keratinocyte differentiation // inferred from mutant phenotype /// 0035329 // hippo signaling // inferred from genetic interaction /// 0035329 // hippo signal…	0005622 // intracellular // inferred from genetic interaction /// 0005634 // nucleus // not recorded /// 0005737 // cytoplasm // not recorded	0005515 // protein binding // inferred from electronic annotation	---
1416092_a_at	0.00148781	3.20969	11.2412	10.9385	10.7068	P	P	P	9.09854	9.29875	9.46827	P	P	P	1416092_a_at	Map4	microtubule-associated protein 4	NM_001205330 /// NM_001205331 /// NM_001205332 /// NM_008633 /// XM_006511952 /// XM_006511953 /// XM_006511954 /// XM_006511955 /// XM_006511956 /// XM_006511957 /// XM_006511958 /// XM_006511959 /// XM_006511960 /// XM_006511961 /// XM_006511962 /// XM_006511963 /// XM_006511964 /// XM_006511965 /// XM_006511966 /// XM_006511967	17758	ENSMUSG00000032479 /// OTTMUSG00000035845	chr9	109931457	110083950	+	0007052 // mitotic spindle organization // inferred from direct assay /// 0007052 // mitotic spindle organization // not recorded /// 0051012 // microtubule sliding // inferred from direct assay /// 0051012 // microtubule sliding // not recorded /// 0051294 // establishment of spindle orientation // inferred from direct assay /// 0051294 // establishment of spindle orientation // not recorded ///…	0005623 // cell // inferred from direct assay /// 0005737 // cytoplasm // not recorded /// 0005856 // cytoskeleton // inferred from electronic annotation /// 0005874 // microtubule // inferred from electronic annotation /// 0005886 // plasma membrane // not recorded /// 0015630 // microtubule cytoskeleton // not recorded /// 0072686 // mitotic spindle // not recorded	0005515 // protein binding // inferred from electronic annotation /// 0008017 // microtubule binding // inferred from direct assay /// 0015631 // tubulin binding // inferred from electronic annotation /// 0044822 // poly(A) RNA binding // not recorded	---
1416104_at	0.0270141	2.20002	10.2477	10.4732	10.2846	P	P	P	8.72949	9.28563	9.48615	P	P	P	1416104_at	Mpdu1	mannose-P-dolichol utilization defect 1	NM_011900 /// XM_006533309 /// XM_006533310 /// XR_388456	24070	ENSMUSG00000018761 /// OTTMUSG00000006008	chr11	69656696	69662620	-	0006810 // transport // inferred from electronic annotation /// 0009312 // oligosaccharide biosynthetic process // not recorded	0005739 // mitochondrion // not recorded /// 0005783 // endoplasmic reticulum // not recorded /// 0016020 // membrane // inferred from electronic annotation /// 0016021 // integral component of membrane // inferred from electronic annotation	---	---
1416117_at	0.0034958	0.435575	6.23503	6.61457	6.25204	A	A	A	7.6897	7.48181	7.55205	P	M	M	1416117_at	Orc3	origin recognition complex, subunit 3	NM_001159563 /// NM_015824	50793	---	chr4	34569131	34614930	-	0006260 // DNA replication // traceable author statement /// 0061351 // neural precursor cell proliferation // inferred from mutant phenotype	0000808 // origin recognition complex // not recorded /// 0005634 // nucleus // inferred from electronic annotation /// 0005664 // nuclear origin of replication recognition complex // not recorded	0003677 // DNA binding // inferred from electronic annotation	Cell_Cycle_KEGG // GenMAPP /// DNA_replication_Reactome // GenMAPP /// G1_to_S_cell_cycle_Reactome // GenMAPP
1416128_at	0.0185721	2.74598	9.23925	9.16195	10.0375	P	P	P	8.28888	7.72668	8.16419	P	P	P	1416128_at	Gm6682 /// Tuba1c	tubulin, alpha 1C pseudogene /// tubulin, alpha 1C	NM_009448 /// NR_033599	22146 /// 626534	ENSMUSG00000043091	chr12	4782081	4783631	+	0006184 // GTP catabolic process // inferred from electronic annotation /// 0007017 // microtubule-based process // inferred from electronic annotation /// 0051258 // protein polymerization // inferred from electronic annotation	0005634 // nucleus // not recorded /// 0005737 // cytoplasm // inferred from electronic annotation /// 0005856 // cytoskeleton // inferred from electronic annotation /// 0005874 // microtubule // inferred from electronic annotation /// 0005881 // cytoplasmic microtubule // inferred from direct assay /// 0015630 // microtubule cytoskeleton // inferred from electronic annotation /// 0043234 // prot…	0000166 // nucleotide binding // inferred from electronic annotation /// 0003924 // GTPase activity // inferred from electronic annotation /// 0005200 // structural constituent of cytoskeleton // inferred from electronic annotation /// 0005525 // GTP binding // inferred from electronic annotation	---
1416148_at	0.00336867	0.467707	10.2863	10.2497	9.90375	P	P	P	11.4765	11.0442	11.2046	P	P	P	1416148_at	Laptm4b	lysosomal-associated protein transmembrane 4B	NM_033521	114128	ENSMUSG00000022257	chr15	34238025	34284302	+	0006810 // transport // inferred from electronic annotation	0012505 // endomembrane system // inferred from electronic annotation /// 0016020 // membrane // inferred from electronic annotation /// 0016021 // integral component of membrane // inferred from electronic annotation	0005515 // protein binding // inferred from electronic annotation	---
1416157_at	0.0100338	5.64692	6.97473	6.67605	5.95861	P	P	P	4.16825	4.60416	3.18498	A	A	A	1416157_at	Vcl	vinculin	NM_009502 /// XM_006518922	22330	ENSMUSG00000021823	chr14	20929397	21033676	+	0002009 // morphogenesis of an epithelium // not recorded /// 0007155 // cell adhesion // inferred from direct assay /// 0030032 // lamellipodium assembly // inferred from direct assay /// 0030334 // regulation of cell migration // inferred from direct assay /// 0034333 // adherens junction assembly // not recorded /// 0034394 // protein localization to cell surface // not recorded /// 0043297 //…	0001725 // stress fiber // not recorded /// 0005737 // cytoplasm // inferred from electronic annotation /// 0005856 // cytoskeleton // inferred from electronic annotation /// 0005884 // actin filament // not recorded /// 0005886 // plasma membrane // inferred from direct assay /// 0005911 // cell-cell junction // inferred from direct assay /// 0005912 // adherens junction // inferred from direct …	0002162 // dystroglycan binding // not recorded /// 0003779 // actin binding // inferred from electronic annotation /// 0005198 // structural molecule activity // inferred from electronic annotation /// 0005515 // protein binding // inferred from physical interaction /// 0017048 // Rho GTPase binding // not recorded /// 0045294 // alpha-catenin binding // not recorded	Integrin-mediated_cell_adhesion_KEGG // GenMAPP
1416160_at	0.00563845	0.49029	7.6447	7.57349	7.30131	P	P	P	8.72745	8.25451	8.60406	P	P	P	1416160_at	Nr2f2	nuclear receptor subfamily 2, group F, member 2	NM_009697 /// NM_183261 /// XM_006540577 /// XM_006540578	11819	ENSMUSG00000030551 /// OTTMUSG00000023060	chr7	70352619	70360592	-	0000122 // negative regulation of transcription from RNA polymerase II promoter // inferred from direct assay /// 0000122 // negative regulation of transcription from RNA polymerase II promoter // not recorded /// 0001701 // in utero embryonic development // inferred from mutant phenotype /// 0001764 // neuron migration // inferred from direct assay /// 0001893 // maternal placenta development //…	0005634 // nucleus // inferred from direct assay /// 0005634 // nucleus // not recorded	0001972 // retinoic acid binding // not recorded /// 0003677 // DNA binding // inferred from direct assay /// 0003700 // sequence-specific DNA binding transcription factor activity // not recorded /// 0003707 // steroid hormone receptor activity // inferred from electronic annotation /// 0004879 // ligand-activated sequence-specific DNA binding RNA polymerase II transcription factor activity // n…	Nuclear_Receptors // GenMAPP
1416164_at	0.0202908	0.352968	9.44389	9.50007	10.3557	P	P	P	11.5827	11.1408	11.236	P	P	P	1416164_at	Fbln5	fibulin 5	NM_011812 /// XM_006515864 /// XM_006515865 /// XM_006515866	23876	ENSMUSG00000021186	chr12	101749937	101819108	-	0001558 // regulation of cell growth // inferred from electronic annotation /// 0007155 // cell adhesion // inferred from electronic annotation /// 0030198 // extracellular matrix organization // inferred from direct assay /// 0034394 // protein localization to cell surface // inferred from mutant phenotype /// 0048251 // elastic fiber assembly // inferred from mutant phenotype /// 2000121 // reg…	0005576 // extracellular region // inferred from electronic annotation /// 0005615 // extracellular space // not recorded /// 0005737 // cytoplasm // inferred from electronic annotation /// 0031012 // extracellular matrix // inferred from direct assay /// 0031012 // extracellular matrix // not recorded /// 0071953 // elastic fiber // inferred from direct assay	0005509 // calcium ion binding // inferred from electronic annotation /// 0005515 // protein binding // inferred from electronic annotation /// 0008022 // protein C-terminus binding // not recorded	---
1416165_at	0.000454976	2.45542	10.2273	9.92882	10.1563	P	P	P	8.9543	8.70801	8.76726	P	P	P	1416165_at	Rab31	RAB31, member RAS oncogene family	NM_133685	106572	ENSMUSG00000056515	chr17	65651728	65772697	-	0006184 // GTP catabolic process // inferred from electronic annotation /// 0006886 // intracellular protein transport // inferred from electronic annotation /// 0006913 // nucleocytoplasmic transport // inferred from electronic annotation /// 0007165 // signal transduction // inferred from electronic annotation /// 0007264 // small GTPase mediated signal transduction // inferred from electronic …	0005622 // intracellular // inferred from electronic annotation /// 0005634 // nucleus // inferred from electronic annotation /// 0005737 // cytoplasm // inferred from electronic annotation /// 0005768 // endosome // inferred from electronic annotation /// 0005769 // early endosome // not recorded /// 0005770 // late endosome // not recorded /// 0005794 // Golgi apparatus // inferred from electro…	0000166 // nucleotide binding // inferred from electronic annotation /// 0003924 // GTPase activity // inferred from electronic annotation /// 0005525 // GTP binding // not recorded /// 0019003 // GDP binding // not recorded	---
1416184_s_at	0.00168485	8.22612	12.1218	11.1954	11.9816	P	P	P	8.36844	9.02736	8.86481	P	P	P	1416184_s_at	Hmga1 /// Hmga1-rs1	high mobility group AT-hook 1 /// high mobility group AT-hook I, related sequence 1	NM_001025427 /// NM_001039356 /// NM_001166476 /// NM_001166477 /// NM_001166535 /// NM_001166536 /// NM_001166537 /// NM_001166539 /// NM_001166540 /// NM_001166541 /// NM_001166542 /// NM_001166543 /// NM_001166544 /// NM_001166545 /// NM_001166546 /// NM_016660	15361 /// 111241	ENSMUSG00000046711 /// ENSMUSG00000078249 /// OTTMUSG00000004118 /// OTTMUSG00000028935	chr17	27556603	27563671	+	0006351 // transcription, DNA-templated // inferred from electronic annotation /// 0006355 // regulation of transcription, DNA-templated // inferred from electronic annotation /// 0006366 // transcription from RNA polymerase II promoter // inferred from direct assay /// 0007283 // spermatogenesis // inferred from mutant phenotype /// 0008285 // negative regulation of cell proliferation // inferre…	0000785 // chromatin // inferred from electronic annotation /// 0005634 // nucleus // inferred from direct assay /// 0005634 // nucleus // not recorded /// 0005694 // chromosome // inferred from electronic annotation /// 0035985 // senescence-associated heterochromatin focus // not recorded	0001077 // RNA polymerase II core promoter proximal region sequence-specific DNA binding transcription factor activity involved in positive regulation of transcription // inferred from direct assay /// 0003677 // DNA binding // inferred from electronic annotation /// 0003700 // sequence-specific DNA binding transcription factor activity // not recorded /// 0003906 // DNA-(apurinic or apyrimidinic…	---
1416216_at	0.0360992	2.32354	10.7136	10.5031	11.4023	P	P	P	9.80652	9.48972	9.81012	P	P	P	1416216_at	Reps1	RalBP1 associated Eps domain containing protein	NM_001111065 /// NM_009048 /// XM_006512621	19707	ENSMUSG00000019854 /// OTTMUSG00000033574	chr10	18055939	18125143	+	0006898 // receptor-mediated endocytosis // inferred from electronic annotation	0005886 // plasma membrane // not recorded /// 0005905 // coated pit // not recorded /// 0016020 // membrane // inferred from electronic annotation	0005509 // calcium ion binding // inferred from electronic annotation /// 0005515 // protein binding // inferred from physical interaction /// 0017124 // SH3 domain binding // not recorded /// 0046872 // metal ion binding // inferred from electronic annotation	---
1416226_at	0.0329136	3.48198	12.1748	11.9943	11.1282	P	P	P	10.0356	10.0138	10.0485	P	P	P	1416226_at	Arpc1b /// Gm5637	actin related protein 2/3 complex, subunit 1B /// predicted pseudogene 5637	NM_023142 /// XM_006544567 /// XM_486686	11867 /// 434782	ENSMUSG00000029622 /// OTTMUSG00000022984	chr5	145114255	145129699	+	0030833 // regulation of actin filament polymerization // inferred from electronic annotation	0005737 // cytoplasm // inferred from electronic annotation /// 0005856 // cytoskeleton // inferred from electronic annotation /// 0005885 // Arp2/3 protein complex // traceable author statement /// 0070062 // extracellular vesicular exosome // not recorded	0003779 // actin binding // inferred from electronic annotation /// 0005515 // protein binding // inferred from electronic annotation	---
1416234_at	0.00744644	2.23771	12.2559	12.277	12.237	P	P	P	11.1465	10.8826	11.2325	P	P	P	1416234_at	Lrrc59	leucine rich repeat containing 59	NM_133807	98238	ENSMUSG00000020869 /// OTTMUSG00000002017	chr11	94629794	94645282	+	---	0005634 // nucleus // inferred from electronic annotation /// 0005635 // nuclear envelope // inferred from electronic annotation /// 0005783 // endoplasmic reticulum // not recorded /// 0005789 // endoplasmic reticulum membrane // inferred from electronic annotation /// 0016020 // membrane // inferred from electronic annotation /// 0016021 // integral component of membrane // inferred from electr…	0005515 // protein binding // inferred from electronic annotation /// 0044822 // poly(A) RNA binding // not recorded	---
1416235_at	0.00807829	3.03686	9.88627	9.74826	9.14345	P	P	P	7.80568	7.99368	8.24045	A	M	P	1416235_at	Lrrc59	leucine rich repeat containing 59	NM_133807	98238	ENSMUSG00000020869 /// OTTMUSG00000002017	chr11	94629794	94645282	+	---	0005634 // nucleus // inferred from electronic annotation /// 0005635 // nuclear envelope // inferred from electronic annotation /// 0005783 // endoplasmic reticulum // not recorded /// 0005789 // endoplasmic reticulum membrane // inferred from electronic annotation /// 0016020 // membrane // inferred from electronic annotation /// 0016021 // integral component of membrane // inferred from electr…	0005515 // protein binding // inferred from electronic annotation /// 0044822 // poly(A) RNA binding // not recorded	---
1416303_at	0.024254	3.75122	12.8325	12.8734	12.9975	P	P	P	11.4243	10.3078	11.0424	P	P	P	1416303_at	Litaf	LPS-induced TN factor	NM_019980 /// XM_006522427	56722	ENSMUSG00000022500 /// OTTMUSG00000026365	chr16	10958858	11066157	-	0001817 // regulation of cytokine production // inferred from mutant phenotype /// 0006351 // transcription, DNA-templated // inferred from electronic annotation /// 0006355 // regulation of transcription, DNA-templated // inferred from electronic annotation /// 0006915 // apoptotic process // inferred from electronic annotation /// 0007165 // signal transduction // not recorded /// 0007568 // ag…	0005634 // nucleus // not recorded /// 0005737 // cytoplasm // not recorded /// 0005764 // lysosome // inferred from electronic annotation /// 0005765 // lysosomal membrane // not recorded /// 0005794 // Golgi apparatus // not recorded /// 0005886 // plasma membrane // not recorded /// 0016020 // membrane // inferred from electronic annotation /// 0043231 // intracellular membrane-bounded organel…	0004871 // signal transducer activity // not recorded /// 0005515 // protein binding // inferred from physical interaction /// 0050699 // WW domain binding // not recorded	---
1416304_at	0.0293371	2.43593	10.7669	11.213	10.2653	P	P	P	9.48989	9.29543	9.72733	P	P	P	1416304_at	Litaf	LPS-induced TN factor	NM_019980 /// XM_006522427	56722	ENSMUSG00000022500 /// OTTMUSG00000026365	chr16	10958858	11066157	-	0001817 // regulation of cytokine production // inferred from mutant phenotype /// 0006351 // transcription, DNA-templated // inferred from electronic annotation /// 0006355 // regulation of transcription, DNA-templated // inferred from electronic annotation /// 0006915 // apoptotic process // inferred from electronic annotation /// 0007165 // signal transduction // not recorded /// 0007568 // ag…	0005634 // nucleus // not recorded /// 0005737 // cytoplasm // not recorded /// 0005764 // lysosome // inferred from electronic annotation /// 0005765 // lysosomal membrane // not recorded /// 0005794 // Golgi apparatus // not recorded /// 0005886 // plasma membrane // not recorded /// 0016020 // membrane // inferred from electronic annotation /// 0043231 // intracellular membrane-bounded organel…	0004871 // signal transducer activity // not recorded /// 0005515 // protein binding // inferred from physical interaction /// 0050699 // WW domain binding // not recorded	---
1416318_at	0.00618728	3.18015	10.8579	10.1997	10.8759	P	P	P	8.74136	9.17109	9.07647	P	P	P	1416318_at	Serpinb1a	serine (or cysteine) peptidase inhibitor, clade B, member 1a	NM_025429 /// XM_006516724	66222	ENSMUSG00000044734 /// OTTMUSG00000000694	chr13	32842098	32851167	-	0010466 // negative regulation of peptidase activity // inferred from electronic annotation /// 0010951 // negative regulation of endopeptidase activity // not recorded /// 0030162 // regulation of proteolysis // not recorded /// 0042176 // regulation of protein catabolic process // inferred from physical interaction	0005615 // extracellular space // not recorded /// 0005737 // cytoplasm // inferred from electronic annotation /// 0070062 // extracellular vesicular exosome // not recorded	0004867 // serine-type endopeptidase inhibitor activity // not recorded /// 0030414 // peptidase inhibitor activity // inferred from electronic annotation	---
1416319_at	0.00452998	0.45247	10.2499	10.6233	10.7427	P	P	P	11.8942	11.7112	11.4538	P	P	P	1416319_at	Adk	adenosine kinase	NM_001243041 /// NM_134079 /// XM_006518440 /// XM_006518441	11534	ENSMUSG00000039197	chr14	21052586	21448569	+	0006166 // purine ribonucleoside salvage // inferred from direct assay /// 0006167 // AMP biosynthetic process // inferred from direct assay /// 0006175 // dATP biosynthetic process // inferred from mutant phenotype /// 0010613 // positive regulation of cardiac muscle hypertrophy // not recorded /// 0016310 // phosphorylation // inferred from direct assay /// 0032922 // circadian regulation of ge…	0005634 // nucleus // inferred from direct assay /// 0005634 // nucleus // not recorded /// 0005737 // cytoplasm // not recorded /// 0005829 // cytosol // inferred from direct assay	0000166 // nucleotide binding // inferred from electronic annotation /// 0004001 // adenosine kinase activity // inferred from direct assay /// 0004001 // adenosine kinase activity // not recorded /// 0005524 // ATP binding // inferred from electronic annotation /// 0016301 // kinase activity // inferred from electronic annotation /// 0016740 // transferase activity // inferred from electronic an…	---
1416321_s_at	0.00649256	0.179277	5.4612	6.70186	6.11938	M	M	A	9.00282	8.19629	8.67202	P	P	P	1416321_s_at	Prelp	proline arginine-rich end leucine-rich repeat	NM_054077 /// XM_006529083 /// XM_006529084 /// XM_006529085	116847	ENSMUSG00000041577 /// OTTMUSG00000026872	chr1	133910277	133921401	-	0007569 // cell aging // inferred from direct assay	0005576 // extracellular region // inferred from electronic annotation /// 0005578 // proteinaceous extracellular matrix // inferred from electronic annotation /// 0031012 // extracellular matrix // not recorded /// 0070062 // extracellular vesicular exosome // not recorded	0005201 // extracellular matrix structural constituent // inferred from electronic annotation /// 0005515 // protein binding // inferred from electronic annotation /// 0008201 // heparin binding // not recorded	---
1416358_at	0.015231	2.82322	8.41094	8.35391	8.62968	P	P	P	6.56881	6.84369	7.38332	P	P	P	1416358_at	Mfsd10	major facilitator superfamily domain containing 10	NM_026660 /// XM_006504077 /// XM_006504078 /// XM_006504079	68294	ENSMUSG00000001082 /// OTTMUSG00000023147	chr5	34633645	34637169	-	0006810 // transport // inferred from electronic annotation /// 0006915 // apoptotic process // inferred from electronic annotation /// 0055085 // transmembrane transport // inferred from electronic annotation	0016020 // membrane // inferred from electronic annotation /// 0016021 // integral component of membrane // inferred from electronic annotation	0005215 // transporter activity // inferred from electronic annotation /// 0022857 // transmembrane transporter activity // inferred from electronic annotation	---
1416367_at	0.0016854	0.458005	10.4599	10.663	10.5661	P	P	P	11.789	11.7807	11.4858	P	P	P	1416367_at	1110001J03Rik	RIKEN cDNA 1110001J03 gene	NM_025363	66117	ENSMUSG00000019689 /// OTTMUSG00000024224	chr6	38534822	38539449	+	---	0005739 // mitochondrion // inferred from direct assay	---	---
1416411_at	0.0340298	0.412814	8.24248	8.29537	8.63349	P	P	P	9.82131	9.0636	9.98996	P	P	P	1416411_at	Gstm2	glutathione S-transferase, mu 2	NM_008183	14863	ENSMUSG00000040562 /// OTTMUSG00000007189	chr3	107981701	107986453	-	0006749 // glutathione metabolic process // not recorded /// 0008152 // metabolic process // inferred from electronic annotation /// 0018916 // nitrobenzene metabolic process // not recorded /// 0042178 // xenobiotic catabolic process // not recorded /// 0070458 // cellular detoxification of nitrogen compound // not recorded	0005737 // cytoplasm // not recorded /// 0005829 // cytosol // not recorded /// 0005886 // plasma membrane // not recorded /// 0043234 // protein complex // not recorded	0004364 // glutathione transferase activity // inferred from direct assay /// 0004364 // glutathione transferase activity // not recorded /// 0005515 // protein binding // inferred from electronic annotation /// 0016740 // transferase activity // inferred from electronic annotation /// 0019899 // enzyme binding // not recorded /// 0042803 // protein homodimerization activity // inferred from dire…	---
1416431_at	0.000176437	11.8447	11.2119	10.5544	10.8482	P	P	P	7.18029	7.6683	7.0703	P	P	P	1416431_at	Tubb6	tubulin, beta 6 class V	NM_026473	67951	ENSMUSG00000001473	chr18	67390729	67402752	+	0006184 // GTP catabolic process // inferred from electronic annotation /// 0007017 // microtubule-based process // inferred from electronic annotation /// 0051258 // protein polymerization // inferred from electronic annotation	0005634 // nucleus // not recorded /// 0005737 // cytoplasm // inferred from electronic annotation /// 0005856 // cytoskeleton // inferred from electronic annotation /// 0005874 // microtubule // not recorded /// 0005886 // plasma membrane // inferred from electronic annotation /// 0015630 // microtubule cytoskeleton // inferred from electronic annotation /// 0043234 // protein complex // inferre…	0000166 // nucleotide binding // inferred from electronic annotation /// 0003924 // GTPase activity // inferred from electronic annotation /// 0005200 // structural constituent of cytoskeleton // inferred from electronic annotation /// 0005525 // GTP binding // inferred from electronic annotation	---
1416433_at	0.0368044	2.24233	8.59513	8.64748	9.38838	P	P	P	7.64362	7.92955	7.68931	P	P	P	1416433_at	Rpa2	replication protein A2	NM_011284	19891	ENSMUSG00000028884 /// OTTMUSG00000009961	chr4	132768338	132778746	+	0000723 // telomere maintenance // inferred from sequence or structural similarity /// 0000724 // double-strand break repair via homologous recombination // inferred from sequence or structural similarity /// 0006260 // DNA replication // not recorded /// 0006281 // DNA repair // inferred from electronic annotation /// 0006284 // base-excision repair // inferred from sequence or structural simila…	0000781 // chromosome, telomeric region // inferred from sequence or structural similarity /// 0005634 // nucleus // not recorded /// 0005654 // nucleoplasm // traceable author statement /// 0005662 // DNA replication factor A complex // not recorded /// 0016605 // PML body // not recorded /// 0035861 // site of double-strand break // not recorded	0003677 // DNA binding // inferred from direct assay /// 0003684 // damaged DNA binding // inferred from sequence or structural similarity /// 0003697 // single-stranded DNA binding // not recorded /// 0005515 // protein binding // inferred from physical interaction /// 0019899 // enzyme binding // not recorded /// 0019903 // protein phosphatase binding // not recorded /// 0031625 // ubiquitin pr…	DNA_replication_Reactome // GenMAPP /// G1_to_S_cell_cycle_Reactome // GenMAPP
1416442_at	0.0307154	5.58858	10.452	10.0587	11.5961	P	P	P	8.46393	8.13778	8.49459	P	P	P	1416442_at	Ier2	immediate early response 2	NM_010499	15936	ENSMUSG00000053560	chr8	84661332	84662842	-	---	0005737 // cytoplasm // inferred from direct assay	---	---
1416458_at	0.00460267	2.88279	10.5661	10.0689	10.4162	P	P	P	8.88308	8.89647	8.72726	P	P	P	1416458_at	Arf2	ADP-ribosylation factor 2	NM_007477 /// XM_006532043	11841	ENSMUSG00000062421 /// OTTMUSG00000003146	chr11	103966870	103985341	+	0006810 // transport // inferred from electronic annotation /// 0006886 // intracellular protein transport // inferred from electronic annotation /// 0007186 // G-protein coupled receptor signaling pathway // inferred from electronic annotation /// 0007264 // small GTPase mediated signal transduction // inferred from electronic annotation /// 0015031 // protein transport // traceable author state…	0005622 // intracellular // inferred from electronic annotation /// 0005634 // nucleus // inferred from electronic annotation /// 0005737 // cytoplasm // inferred from electronic annotation /// 0005794 // Golgi apparatus // inferred from direct assay	0000166 // nucleotide binding // inferred from electronic annotation /// 0003924 // GTPase activity // inferred from electronic annotation /// 0004871 // signal transducer activity // inferred from electronic annotation /// 0005525 // GTP binding // traceable author statement /// 0019001 // guanyl nucleotide binding // inferred from electronic annotation /// 0031683 // G-protein beta/gamma-subuni…	---
1416464_at	0.000109686	0.128442	6.58176	7.00722	6.80254	P	P	P	9.75849	9.50606	9.99875	P	P	P	1416464_at	Slc4a1	solute carrier family 4 (anion exchanger), member 1	NM_011403	20533	ENSMUSG00000006574 /// OTTMUSG00000002767	chr11	102348823	102365273	-	0006810 // transport // inferred from electronic annotation /// 0006811 // ion transport // inferred from electronic annotation /// 0006820 // anion transport // not recorded /// 0006821 // chloride transport // inferred from direct assay /// 0015701 // bicarbonate transport // not recorded /// 0034220 // ion transmembrane transport // not recorded /// 1902476 // chloride transmembrane transport …	0005886 // plasma membrane // inferred from electronic annotation /// 0005887 // integral component of plasma membrane // not recorded /// 0016020 // membrane // inferred from direct assay /// 0016021 // integral component of membrane // inferred from electronic annotation /// 0016323 // basolateral plasma membrane // inferred from direct assay /// 0016323 // basolateral plasma membrane // not re…	0003779 // actin binding // not recorded /// 0005215 // transporter activity // inferred from electronic annotation /// 0005452 // inorganic anion exchanger activity // not recorded /// 0005515 // protein binding // inferred from physical interaction /// 0008022 // protein C-terminus binding // not recorded /// 0008509 // anion transmembrane transporter activity // inferred from electronic annota…	---
1416487_a_at	0.0212999	2.30707	9.13654	8.82462	8.48281	P	P	P	7.60406	7.58768	7.70479	P	P	P	1416487_a_at	Yap1	yes-associated protein 1	NM_001171147 /// NM_009534 /// XM_006509852 /// XM_006509853 /// XM_006509854 /// XM_006509855 /// XM_006509856 /// XM_006509857	22601	ENSMUSG00000053110 /// OTTMUSG00000038037	chr9	7931998	8004588	-	0001570 // vasculogenesis // inferred from mutant phenotype /// 0003143 // embryonic heart tube morphogenesis // inferred from genetic interaction /// 0006351 // transcription, DNA-templated // inferred from electronic annotation /// 0006355 // regulation of transcription, DNA-templated // inferred from electronic annotation /// 0006357 // regulation of transcription from RNA polymerase II promot…	0005634 // nucleus // inferred from direct assay /// 0005634 // nucleus // not recorded /// 0005667 // transcription factor complex // inferred from genetic interaction /// 0005737 // cytoplasm // inferred from direct assay /// 0005737 // cytoplasm // not recorded /// 0005829 // cytosol // inferred from direct assay /// 0016020 // membrane // inferred from direct assay	0001076 // RNA polymerase II transcription factor binding transcription factor activity // inferred from physical interaction /// 0003682 // chromatin binding // inferred from direct assay /// 0003713 // transcription coactivator activity // inferred from direct assay /// 0003713 // transcription coactivator activity // not recorded /// 0003714 // transcription corepressor activity // not recorde…	---
1416489_at	0.042808	2.3826	10.5337	10.1107	11.1578	P	P	P	9.60242	9.44175	9.16069	P	P	P	1416489_at	Pi4k2b	phosphatidylinositol 4-kinase type 2 beta	NM_025951 /// NM_028744 /// XM_006504064	67073	ENSMUSG00000029186 /// OTTMUSG00000023351	chr5	52741585	52769341	+	0016310 // phosphorylation // inferred from electronic annotation /// 0046854 // phosphatidylinositol phosphorylation // inferred from electronic annotation	0005737 // cytoplasm // not recorded /// 0016020 // membrane // inferred from electronic annotation	0000166 // nucleotide binding // inferred from electronic annotation /// 0004430 // 1-phosphatidylinositol 4-kinase activity // inferred from electronic annotation /// 0005524 // ATP binding // inferred from electronic annotation /// 0016301 // kinase activity // inferred from electronic annotation /// 0016740 // transferase activity // inferred from electronic annotation /// 0016773 // phosphotr…	---
1416498_at	0.0403846	0.3866	10.1099	10.8994	11.1077	P	P	P	12.2033	12.0683	12.1347	P	P	P	1416498_at	Ppic	peptidylprolyl isomerase C	NM_008908	19038	ENSMUSG00000024538	chr18	53406331	53418032	-	0000413 // protein peptidyl-prolyl isomerization // inferred from electronic annotation /// 0006457 // protein folding // inferred from electronic annotation	0005737 // cytoplasm // inferred from electronic annotation	0003755 // peptidyl-prolyl cis-trans isomerase activity // inferred from electronic annotation /// 0005515 // protein binding // inferred from physical interaction /// 0016853 // isomerase activity // inferred from electronic annotation /// 0042277 // peptide binding // inferred from electronic annotation	---
1416505_at	0.015104	4.50561	9.09689	9.14369	10.2101	P	P	P	7.71799	7.10865	7.33452	P	P	P	1416505_at	Nr4a1	nuclear receptor subfamily 4, group A, member 1	NM_010444 /// XM_006520455 /// XM_006520456 /// XM_006520457 /// XM_006520458 /// XM_006520459	15370	ENSMUSG00000023034	chr15	101266850	101274799	+	0001938 // positive regulation of endothelial cell proliferation // not recorded /// 0002042 // cell migration involved in sprouting angiogenesis // not recorded /// 0006351 // transcription, DNA-templated // inferred from electronic annotation /// 0006355 // regulation of transcription, DNA-templated // inferred from electronic annotation /// 0006366 // transcription from RNA polymerase II promo…	0005634 // nucleus // inferred from direct assay /// 0005634 // nucleus // not recorded /// 0005667 // transcription factor complex // inferred from direct assay /// 0005737 // cytoplasm // inferred from electronic annotation	0001077 // RNA polymerase II core promoter proximal region sequence-specific DNA binding transcription factor activity involved in positive regulation of transcription // inferred from direct assay /// 0003677 // DNA binding // inferred from direct assay /// 0003700 // sequence-specific DNA binding transcription factor activity // inferred from electronic annotation /// 0003707 // steroid hormone…	Nuclear_Receptors // GenMAPP
1416511_a_at	0.0017151	2.85932	9.05245	9.00288	9.16113	P	P	P	7.53087	7.36953	7.74842	P	P	P	1416511_a_at	Cdc42ep4	CDC42 effector protein (Rho GTPase binding) 4	NM_001163346 /// NM_020006 /// XM_006533815 /// XM_006533816 /// XM_006533817 /// XM_006533818 /// XM_006533819 /// XR_388501	56699	ENSMUSG00000041598 /// OTTMUSG00000003850	chr11	113726851	113751318	-	0007266 // Rho protein signal transduction // inferred from direct assay /// 0008360 // regulation of cell shape // not recorded /// 0031274 // positive regulation of pseudopodium assembly // not recorded	0005737 // cytoplasm // inferred from direct assay /// 0005856 // cytoskeleton // inferred from electronic annotation /// 0005886 // plasma membrane // not recorded /// 0012505 // endomembrane system // inferred from electronic annotation /// 0015629 // actin cytoskeleton // not recorded /// 0015630 // microtubule cytoskeleton // not recorded /// 0016020 // membrane // inferred from electronic an…	0005515 // protein binding // inferred from physical interaction /// 0044822 // poly(A) RNA binding // not recorded	---
1416528_at	0.00308533	3.68188	13.0275	12.5342	12.2838	P	P	P	10.5325	10.6017	11.102	P	P	P	1416528_at	Sh3bgrl3	SH3 domain binding glutamic acid-rich protein-like 3	NM_080559	73723	ENSMUSG00000028843 /// OTTMUSG00000010335	chr4	134127405	134128789	-	0045454 // cell redox homeostasis // inferred from electronic annotation /// 0055114 // oxidation-reduction process // inferred from electronic annotation	0005634 // nucleus // inferred from electronic annotation /// 0005737 // cytoplasm // inferred from electronic annotation /// 0070062 // extracellular vesicular exosome // not recorded	0009055 // electron carrier activity // inferred from electronic annotation /// 0015035 // protein disulfide oxidoreductase activity // inferred from electronic annotation	---
1416538_at	0.00307175	0.323634	6.3756	6.20928	6.79674	P	P	P	7.93715	8.45079	7.86873	P	P	P	1416538_at	Siae	sialic acid acetylesterase	NM_011734 /// XM_006510154	22619	ENSMUSG00000001942 /// OTTMUSG00000027448	chr9	37613809	37649207	+	0002682 // regulation of immune system process // not recorded /// 0005975 // carbohydrate metabolic process // not recorded /// 0008152 // metabolic process // inferred from electronic annotation	0005737 // cytoplasm // inferred from electronic annotation /// 0005764 // lysosome // inferred from electronic annotation /// 0070062 // extracellular vesicular exosome // not recorded	0001681 // sialate O-acetylesterase activity // not recorded /// 0016787 // hydrolase activity // inferred from electronic annotation	---
1416539_at	0.0475247	0.348497	5.80157	7.11272	6.23986	P	P	P	8.08136	8.08258	7.85871	P	P	P	1416539_at	Siae	sialic acid acetylesterase	NM_011734 /// XM_006510154	22619	---	chr9	37613809	37649207	+	0002682 // regulation of immune system process // not recorded /// 0005975 // carbohydrate metabolic process // not recorded /// 0008152 // metabolic process // inferred from electronic annotation	0005737 // cytoplasm // inferred from electronic annotation /// 0005764 // lysosome // inferred from electronic annotation /// 0070062 // extracellular vesicular exosome // not recorded	0001681 // sialate O-acetylesterase activity // not recorded /// 0016787 // hydrolase activity // inferred from electronic annotation	---
1416576_at	0.0144241	10.4873	9.0873	9.01846	10.4374	P	P	P	6.08459	6.2114	6.51693	A	A	A	1416576_at	Socs3	suppressor of cytokine signaling 3	NM_007707 /// XM_006532110	12702	ENSMUSG00000053113 /// OTTMUSG00000003735	chr11	117966078	117969394	-	0001932 // regulation of protein phosphorylation // inferred from direct assay /// 0007165 // signal transduction // not recorded /// 0007259 // JAK-STAT cascade // not recorded /// 0009968 // negative regulation of signal transduction // inferred from genetic interaction /// 0016567 // protein ubiquitination // inferred from electronic annotation /// 0035556 // intracellular signal transduction …	0005737 // cytoplasm // not recorded /// 0005829 // cytosol // traceable author statement	0005515 // protein binding // inferred from physical interaction	---
1416589_at	0.029743	2.84353	12.3702	12.2246	11.2949	P	P	P	10.1266	10.7461	10.6375	P	P	P	1416589_at	Sparc	secreted acidic cysteine rich glycoprotein	NM_001290817 /// NM_009242 /// XM_006532666 /// XM_006532667	20692	ENSMUSG00000018593 /// OTTMUSG00000005692	chr11	55394499	55419930	-	0001503 // ossification // inferred from electronic annotation /// 0007165 // signal transduction // inferred from electronic annotation /// 0007507 // heart development // inferred from electronic annotation /// 0009629 // response to gravity // inferred from electronic annotation /// 0010288 // response to lead ion // inferred from electronic annotation /// 0030324 // lung development // not re…	0005576 // extracellular region // inferred from electronic annotation /// 0005578 // proteinaceous extracellular matrix // inferred from electronic annotation /// 0005604 // basement membrane // inferred from electronic annotation /// 0005615 // extracellular space // not recorded /// 0005622 // intracellular // not recorded /// 0005634 // nucleus // not recorded /// 0005737 // cytoplasm // not …	0005509 // calcium ion binding // not recorded /// 0005515 // protein binding // inferred from electronic annotation /// 0046872 // metal ion binding // inferred from electronic annotation /// 0050840 // extracellular matrix binding // inferred from direct assay	---
1416600_a_at	0.00211412	2.40386	12.2743	12.3771	12.568	P	P	P	11.1947	11.3222	10.8883	P	P	P	1416600_a_at	Rcan1	regulator of calcineurin 1	NM_001081549 /// NM_019466	54720	ENSMUSG00000022951	chr16	92391950	92466125	-	0002931 // response to ischemia // inferred from mutant phenotype /// 0006950 // response to stress // inferred from genetic interaction /// 0006950 // response to stress // inferred from mutant phenotype /// 0006979 // response to oxidative stress // inferred from genetic interaction /// 0007519 // skeletal muscle tissue development // inferred from electronic annotation /// 0007614 // short-ter…	0005622 // intracellular // inferred from genetic interaction /// 0005634 // nucleus // inferred from direct assay /// 0005737 // cytoplasm // inferred from direct assay	0005515 // protein binding // inferred from physical interaction /// 0042802 // identical protein binding // not recorded	---
1416625_at	0.00857357	0.304549	9.71735	10.143	10.1518	P	P	P	12.0146	11.1961	11.8642	P	P	P	1416625_at	Serping1	serine (or cysteine) peptidase inhibitor, clade G, member 1	NM_009776 /// XM_006498623	12258	ENSMUSG00000023224 /// OTTMUSG00000013680	chr2	84765359	84774939	-	0001869 // negative regulation of complement activation, lectin pathway // not recorded /// 0002376 // immune system process // inferred from electronic annotation /// 0006958 // complement activation, classical pathway // inferred from electronic annotation /// 0007596 // blood coagulation // inferred from electronic annotation /// 0007599 // hemostasis // inferred from electronic annotation ///…	0005576 // extracellular region // inferred from electronic annotation /// 0005615 // extracellular space // inferred from direct assay /// 0070062 // extracellular vesicular exosome // not recorded /// 0072562 // blood microparticle // not recorded	0001848 // complement binding // inferred from physical interaction /// 0004867 // serine-type endopeptidase inhibitor activity // inferred from direct assay /// 0004867 // serine-type endopeptidase inhibitor activity // not recorded /// 0005515 // protein binding // inferred from electronic annotation /// 0030414 // peptidase inhibitor activity // inferred from electronic annotation	---
1416652_at	0.00596984	0.187478	4.57125	4.92351	3.84683	P	P	A	7.14877	6.58038	6.99803	P	P	P	1416652_at	Aspn	asporin	NM_001172481 /// NM_025711	66695	ENSMUSG00000021388	chr13	49544442	49567560	+	0006810 // transport // inferred from electronic annotation /// 0006811 // ion transport // inferred from electronic annotation /// 0030282 // bone mineralization // not recorded /// 0030512 // negative regulation of transforming growth factor beta receptor signaling pathway // inferred from direct assay /// 0030512 // negative regulation of transforming growth factor beta receptor signaling path…	0005576 // extracellular region // inferred from electronic annotation /// 0005578 // proteinaceous extracellular matrix // inferred from direct assay /// 0005578 // proteinaceous extracellular matrix // not recorded /// 0016021 // integral component of membrane // inferred from electronic annotation /// 0031012 // extracellular matrix // not recorded /// 0046930 // pore complex // inferred from …	0005509 // calcium ion binding // not recorded /// 0005515 // protein binding // inferred from physical interaction /// 0005518 // collagen binding // inferred from electronic annotation /// 0015288 // porin activity // inferred from electronic annotation	---
1416656_at	0.00124338	2.82359	12.4257	12.0926	11.9828	P	P	P	10.6438	10.8567	10.526	P	P	P	1416656_at	Clic1	chloride intracellular channel 1	NM_033444	114584	ENSMUSG00000007041 /// OTTMUSG00000037145	chr17	35050205	35058727	+	0006810 // transport // inferred from electronic annotation /// 0006811 // ion transport // inferred from electronic annotation /// 0006821 // chloride transport // not recorded /// 0007049 // cell cycle // inferred from electronic annotation /// 0034765 // regulation of ion transmembrane transport // inferred from electronic annotation /// 0044070 // regulation of anion transport // inferred fro…	0001725 // stress fiber // not recorded /// 0001725 // stress fiber // inferred from electronic annotation /// 0005615 // extracellular space // not recorded /// 0005634 // nucleus // inferred from direct assay /// 0005635 // nuclear envelope // not recorded /// 0005737 // cytoplasm // not recorded /// 0005739 // mitochondrion // inferred from direct assay /// 0005856 // cytoskeleton // inferred …	0000166 // nucleotide binding // inferred from electronic annotation /// 0005244 // voltage-gated ion channel activity // inferred from electronic annotation /// 0005247 // voltage-gated chloride channel activity // inferred from electronic annotation /// 0005254 // chloride channel activity // not recorded /// 0005515 // protein binding // inferred from electronic annotation /// 0005525 // GTP b…	---
1416677_at	0.0220445	0.240112	7.96699	9.21723	8.9462	P	P	P	11.0504	10.6392	10.8607	P	P	P	1416677_at	Apoh	apolipoprotein H	NM_013475 /// XM_006532042	11818	ENSMUSG00000000049 /// OTTMUSG00000003129	chr11	108395301	108414396	+	0001937 // negative regulation of endothelial cell proliferation // not recorded /// 0006641 // triglyceride metabolic process // not recorded /// 0007596 // blood coagulation // not recorded /// 0007597 // blood coagulation, intrinsic pathway // not recorded /// 0010596 // negative regulation of endothelial cell migration // not recorded /// 0016525 // negative regulation of angiogenesis // not …	0005576 // extracellular region // inferred from electronic annotation /// 0005615 // extracellular space // inferred from direct assay /// 0005615 // extracellular space // not recorded /// 0009986 // cell surface // not recorded /// 0031012 // extracellular matrix // not recorded /// 0034361 // very-low-density lipoprotein particle // not recorded /// 0034364 // high-density lipoprotein particl…	0001948 // glycoprotein binding // not recorded /// 0005515 // protein binding // inferred from electronic annotation /// 0005543 // phospholipid binding // not recorded /// 0008201 // heparin binding // inferred from electronic annotation /// 0008289 // lipid binding // not recorded /// 0042802 // identical protein binding // not recorded /// 0060230 // lipoprotein lipase activator activity // n…	---
1416697_at	0.00393013	0.457193	9.31596	9.45439	9.59443	P	P	P	10.6281	10.7759	10.3258	P	P	P	1416697_at	Dpp4	dipeptidylpeptidase 4	NM_001159543 /// NM_010074 /// XM_006498690 /// XM_006498691 /// XM_006498692 /// XM_006498693 /// XR_374400	13482	ENSMUSG00000035000 /// OTTMUSG00000012759	chr2	62331628	62412231	-	0001666 // response to hypoxia // not recorded /// 0002709 // regulation of T cell mediated immunity // not recorded /// 0006508 // proteolysis // not recorded /// 0007155 // cell adhesion // inferred from electronic annotation /// 0008284 // positive regulation of cell proliferation // not recorded /// 0010716 // negative regulation of extracellular matrix disassembly // not recorded /// 0031295…	0005576 // extracellular region // inferred from electronic annotation /// 0005765 // lysosomal membrane // not recorded /// 0005783 // endoplasmic reticulum // not recorded /// 0005794 // Golgi apparatus // not recorded /// 0005886 // plasma membrane // not recorded /// 0009986 // cell surface // not recorded /// 0016020 // membrane // inferred from electronic annotation /// 0016021 // integral …	0002020 // protease binding // not recorded /// 0004177 // aminopeptidase activity // inferred from electronic annotation /// 0004252 // serine-type endopeptidase activity // inferred from electronic annotation /// 0005102 // receptor binding // not recorded /// 0005515 // protein binding // inferred from electronic annotation /// 0005518 // collagen binding // not recorded /// 0008233 // peptida…	---
1416700_at	0.00339852	2.26831	10.5121	10.0472	10.396	P	P	P	9.38803	9.03453	8.99396	P	P	P	1416700_at	Rnd3	Rho family GTPase 3	NM_028810	74194	ENSMUSG00000017144 /// OTTMUSG00000012429	chr2	51130434	51149111	-	0006184 // GTP catabolic process // inferred from electronic annotation /// 0007165 // signal transduction // inferred from electronic annotation /// 0007264 // small GTPase mediated signal transduction // inferred from electronic annotation /// 0015031 // protein transport // inferred from electronic annotation	0000139 // Golgi membrane // inferred from electronic annotation /// 0005622 // intracellular // inferred from electronic annotation /// 0005794 // Golgi apparatus // inferred from electronic annotation /// 0016020 // membrane // inferred from electronic annotation	0000166 // nucleotide binding // inferred from electronic annotation /// 0003924 // GTPase activity // inferred from electronic annotation /// 0005515 // protein binding // inferred from physical interaction /// 0005525 // GTP binding // inferred from electronic annotation	---
1416701_at	0.000112331	2.20948	9.00206	8.86196	8.82535	P	P	P	7.65251	7.77177	7.83418	P	P	P	1416701_at	Rnd3	Rho family GTPase 3	NM_028810	74194	ENSMUSG00000017144 /// OTTMUSG00000012429	chr2	51130434	51149111	-	0006184 // GTP catabolic process // inferred from electronic annotation /// 0007165 // signal transduction // inferred from electronic annotation /// 0007264 // small GTPase mediated signal transduction // inferred from electronic annotation /// 0015031 // protein transport // inferred from electronic annotation	0000139 // Golgi membrane // inferred from electronic annotation /// 0005622 // intracellular // inferred from electronic annotation /// 0005794 // Golgi apparatus // inferred from electronic annotation /// 0016020 // membrane // inferred from electronic annotation	0000166 // nucleotide binding // inferred from electronic annotation /// 0003924 // GTPase activity // inferred from electronic annotation /// 0005515 // protein binding // inferred from physical interaction /// 0005525 // GTP binding // inferred from electronic annotation	---
1416745_x_at	0.00252354	0.410349	6.00509	6.16582	6.20313	P	P	P	7.2904	7.64037	7.2758	P	P	P	1416745_x_at	LOC102642017 /// Uap1	UDP-N-acetylhexosamine pyrophosphorylase-like /// UDP-N-acetylglucosamine pyrophosphorylase 1	NM_133806 /// XM_006496606 /// XM_006496607 /// XM_006496608 /// XM_006496609 /// XM_006496610 /// XM_006544650	107652 /// 102642017	ENSMUSG00000026670 /// OTTMUSG00000023030	chr1	170141222	170174964	-	0006047 // UDP-N-acetylglucosamine metabolic process // not recorded /// 0006048 // UDP-N-acetylglucosamine biosynthetic process // inferred from electronic annotation /// 0008152 // metabolic process // inferred from electronic annotation	0005634 // nucleus // inferred from electronic annotation /// 0005737 // cytoplasm // inferred from electronic annotation /// 0005829 // cytosol // not recorded /// 0005886 // plasma membrane // inferred from electronic annotation	0003977 // UDP-N-acetylglucosamine diphosphorylase activity // not recorded /// 0016740 // transferase activity // inferred from electronic annotation /// 0016779 // nucleotidyltransferase activity // inferred from electronic annotation /// 0030246 // carbohydrate binding // not recorded	---
1416746_at	0.0109271	2.3678	9.62718	9.82634	9.13658	P	P	P	8.13529	8.08683	8.65129	P	P	P	1416746_at	H2afx	H2A histone family, member X	NM_010436	15270	ENSMUSG00000049932 /// OTTMUSG00000042356	chr9	44334706	44336077	+	0000077 // DNA damage checkpoint // inferred from mutant phenotype /// 0000724 // double-strand break repair via homologous recombination // inferred from mutant phenotype /// 0006281 // DNA repair // inferred from direct assay /// 0006281 // DNA repair // inferred from mutant phenotype /// 0006310 // DNA recombination // inferred from electronic annotation /// 0006334 // nucleosome assembly // i…	0000781 // chromosome, telomeric region // not recorded /// 0000785 // chromatin // inferred from direct assay /// 0000786 // nucleosome // inferred from electronic annotation /// 0000790 // nuclear chromatin // inferred from direct assay /// 0000794 // condensed nuclear chromosome // inferred from direct assay /// 0001673 // male germ cell nucleus // inferred from direct assay /// 0001741 // XY …	0003677 // DNA binding // inferred from electronic annotation /// 0003684 // damaged DNA binding // inferred from direct assay /// 0005515 // protein binding // inferred from physical interaction /// 0019899 // enzyme binding // not recorded /// 0042393 // histone binding // not recorded /// 0043565 // sequence-specific DNA binding // inferred from electronic annotation /// 0046982 // protein het…	Proteasome_Degradation // GenMAPP
1416749_at	0.00560735	2.19334	12.5839	12.5627	12.5271	P	P	P	11.3949	11.593	11.2684	P	P	P	1416749_at	Htra1	HtrA serine peptidase 1	NM_019564	56213	ENSMUSG00000006205 /// OTTMUSG00000031663	chr7	130936129	130985651	+	0001558 // regulation of cell growth // inferred from electronic annotation /// 0006508 // proteolysis // inferred from direct assay /// 0030512 // negative regulation of transforming growth factor beta receptor signaling pathway // inferred from direct assay /// 0030514 // negative regulation of BMP signaling pathway // inferred from direct assay /// 0050679 // positive regulation of epithelial …	0005576 // extracellular region // inferred from electronic annotation /// 0005737 // cytoplasm // inferred from electronic annotation /// 0005829 // cytosol // inferred from electronic annotation /// 0031012 // extracellular matrix // not recorded /// 0070062 // extracellular vesicular exosome // not recorded	0003824 // catalytic activity // inferred from electronic annotation /// 0004252 // serine-type endopeptidase activity // inferred from electronic annotation /// 0005515 // protein binding // inferred from physical interaction /// 0005520 // insulin-like growth factor binding // inferred from electronic annotation /// 0008233 // peptidase activity // inferred from electronic annotation /// 000823…	---
1416761_at	0.0079817	0.403894	10.7529	10.8225	10.1959	P	P	P	12.0902	11.6731	11.978	P	P	P	1416761_at	Hsd11b2	hydroxysteroid 11-beta dehydrogenase 2	NM_008289	15484	ENSMUSG00000031891	chr8	105518754	105523988	+	0001666 // response to hypoxia // inferred from electronic annotation /// 0002017 // regulation of blood volume by renal aldosterone // not recorded /// 0007565 // female pregnancy // inferred from electronic annotation /// 0008152 // metabolic process // not recorded /// 0008211 // glucocorticoid metabolic process // not recorded /// 0032094 // response to food // inferred from electronic annota…	0005737 // cytoplasm // not recorded /// 0005783 // endoplasmic reticulum // inferred from electronic annotation /// 0043231 // intracellular membrane-bounded organelle // not recorded	0000252 // C-3 sterol dehydrogenase (C-4 sterol decarboxylase) activity // inferred from electronic annotation /// 0003845 // 11-beta-hydroxysteroid dehydrogenase [NAD(P)] activity // not recorded /// 0004033 // aldo-keto reductase (NADP) activity // inferred from electronic annotation /// 0004448 // isocitrate dehydrogenase activity // inferred from electronic annotation /// 0004495 // mevaldate…	Glucocorticoid_Mineralocorticoid_Metabolism // GenMAPP /// Prostaglandin_synthesis_regulation // GenMAPP
1416762_at	2.14494e-05	3.85181	14.0917	14.2226	14.2223	P	P	P	12.2587	12.3167	12.1216	P	P	P	1416762_at	S100a10	S100 calcium binding protein A10 (calpactin)	NM_009112 /// XM_006501168 /// XM_006543794	20194	ENSMUSG00000041959 /// OTTMUSG00000022124	chr3	93555106	93564713	+	0001765 // membrane raft assembly // not recorded /// 0006900 // membrane budding // not recorded /// 0032855 // positive regulation of Rac GTPase activity // not recorded /// 0051099 // positive regulation of binding // inferred from mutant phenotype /// 0051290 // protein heterotetramerization // not recorded /// 0051496 // positive regulation of stress fiber assembly // not recorded /// 005189…	0005783 // endoplasmic reticulum // not recorded /// 0019897 // extrinsic component of plasma membrane // inferred from direct assay /// 0045121 // membrane raft // not recorded /// 0070062 // extracellular vesicular exosome // not recorded	0005509 // calcium ion binding // inferred from electronic annotation /// 0005515 // protein binding // inferred from physical interaction /// 0042803 // protein homodimerization activity // not recorded /// 0044325 // ion channel binding // not recorded	Prostaglandin_synthesis_regulation // GenMAPP
1416778_at	0.0446247	0.363932	10.0685	9.69418	8.88307	P	P	P	11.1415	11.1473	10.9635	P	P	P	1416778_at	Sdpr	serum deprivation response	NM_138741	20324	ENSMUSG00000045954	chr1	51289083	51302955	+	0045944 // positive regulation of transcription from RNA polymerase II promoter // not recorded	0005737 // cytoplasm // not recorded /// 0005794 // Golgi apparatus // inferred from electronic annotation /// 0005829 // cytosol // not recorded /// 0005886 // plasma membrane // inferred from electronic annotation /// 0005901 // caveola // inferred from electronic annotation /// 0016020 // membrane // inferred from electronic annotation	0001786 // phosphatidylserine binding // not recorded /// 0005515 // protein binding // inferred from electronic annotation /// 0008289 // lipid binding // inferred from electronic annotation	---
1416780_at	0.00115657	0.409049	8.48599	8.3983	8.2284	P	P	P	9.45805	9.67171	9.83861	P	P	P	1416780_at	Pfkm	phosphofructokinase, muscle	NM_001163487 /// NM_001163488 /// NM_021514 /// XM_006520600 /// XM_006520601 /// XM_006520602	18642	ENSMUSG00000033065	chr15	98108465	98132441	+	0006002 // fructose 6-phosphate metabolic process // not recorded /// 0006096 // glycolytic process // inferred from direct assay /// 0006096 // glycolytic process // inferred from mutant phenotype /// 0006096 // glycolytic process // inferred from sequence or structural similarity /// 0008152 // metabolic process // inferred from electronic annotation /// 0016310 // phosphorylation // inferred f…	0005737 // cytoplasm // inferred from electronic annotation /// 0005829 // cytosol // inferred from direct assay /// 0005945 // 6-phosphofructokinase complex // not recorded /// 0016324 // apical plasma membrane // not recorded /// 0097228 // sperm principal piece // inferred from direct assay	0000166 // nucleotide binding // inferred from electronic annotation /// 0003824 // catalytic activity // inferred from electronic annotation /// 0003872 // 6-phosphofructokinase activity // inferred from direct assay /// 0003872 // 6-phosphofructokinase activity // inferred from mutant phenotype /// 0003872 // 6-phosphofructokinase activity // not recorded /// 0003872 // 6-phosphofructokinase ac…	Glycolysis_and_Gluconeogenesis // GenMAPP
1416832_at	0.0429818	0.244011	9.10838	10.0802	10.7186	P	P	P	12.1534	12.1058	12.1803	P	P	P	1416832_at	Slc39a8	solute carrier family 39 (metal ion transporter), member 8	NM_001135149 /// NM_001135150 /// NM_026228 /// XM_006501934 /// XM_006501935 /// XM_006501936	67547	ENSMUSG00000053897 /// OTTMUSG00000024378	chr3	135825278	135888570	+	0006810 // transport // inferred from electronic annotation /// 0006811 // ion transport // inferred from electronic annotation /// 0006829 // zinc ion transport // not recorded /// 0030001 // metal ion transport // inferred from electronic annotation /// 0055085 // transmembrane transport // inferred from electronic annotation /// 0070574 // cadmium ion transmembrane transport // inferred from d…	0005886 // plasma membrane // inferred from direct assay /// 0016020 // membrane // inferred from electronic annotation /// 0016021 // integral component of membrane // inferred from electronic annotation /// 0031090 // organelle membrane // not recorded	0046873 // metal ion transmembrane transporter activity // inferred from electronic annotation	---
1416842_at	0.00477055	2.3266	13.5294	13.7542	14.0685	P	P	P	12.5763	12.7551	12.3949	P	P	P	1416842_at	Gstm5	glutathione S-transferase, mu 5	NM_010360	14866	ENSMUSG00000004032 /// OTTMUSG00000035923	chr3	107895823	107898686	+	0006749 // glutathione metabolic process // not recorded /// 0008152 // metabolic process // inferred from electronic annotation /// 0018916 // nitrobenzene metabolic process // not recorded /// 0042178 // xenobiotic catabolic process // not recorded /// 0043627 // response to estrogen // inferred from electronic annotation /// 0070458 // cellular detoxification of nitrogen compound // not record…	0005634 // nucleus // not recorded /// 0005737 // cytoplasm // not recorded /// 0035686 // sperm fibrous sheath // inferred from direct assay	0004364 // glutathione transferase activity // inferred from direct assay /// 0004364 // glutathione transferase activity // not recorded /// 0005515 // protein binding // inferred from physical interaction /// 0016740 // transferase activity // inferred from electronic annotation /// 0019899 // enzyme binding // not recorded /// 0042802 // identical protein binding // not recorded /// 0042803 //…	---
1416846_a_at	0.00261698	0.475046	9.01683	9.06598	9.32413	P	P	P	10.2938	10.1436	10.2063	P	P	P	1416846_a_at	Pdzrn3	PDZ domain containing RING finger 3	NM_018884 /// XM_006506404 /// XM_006506405	55983	ENSMUSG00000035357 /// OTTMUSG00000026975	chr6	101149613	101377897	-	0007528 // neuromuscular junction development // inferred from mutant phenotype /// 0016567 // protein ubiquitination // inferred from direct assay	0031594 // neuromuscular junction // inferred from direct assay	0004842 // ubiquitin-protein transferase activity // inferred from direct assay /// 0005515 // protein binding // inferred from physical interaction /// 0008270 // zinc ion binding // inferred from electronic annotation /// 0008766 // UDP-N-acetylmuramoylalanyl-D-glutamyl-2,6-diaminopimelate-D-alanyl-D-alanine ligase activity // inferred from electronic annotation /// 0016874 // ligase activity /…	---
1416855_at	0.000632821	0.291385	8.81457	9.04597	9.14355	P	P	P	10.7535	10.558	11.0129	P	P	P	1416855_at	Gas1	growth arrest specific 1	NM_008086	14451	ENSMUSG00000052957 /// OTTMUSG00000033412	chr13	60174404	60177535	-	0002053 // positive regulation of mesenchymal cell proliferation // inferred from mutant phenotype /// 0007049 // cell cycle // inferred from electronic annotation /// 0007050 // cell cycle arrest // traceable author statement /// 0007411 // axon guidance // inferred from mutant phenotype /// 0008284 // positive regulation of cell proliferation // inferred from mutant phenotype /// 0008589 // reg…	0005886 // plasma membrane // inferred from direct assay /// 0005886 // plasma membrane // not recorded /// 0016020 // membrane // inferred from direct assay /// 0031225 // anchored component of membrane // inferred from electronic annotation /// 0046658 // anchored component of plasma membrane // inferred from direct assay /// 0046658 // anchored component of plasma membrane // inferred from seq…	0005515 // protein binding // inferred from physical interaction	---
1416871_at	0.0133403	9.12819	9.05718	8.61045	7.27705	P	P	P	5.25606	5.96416	4.13108	A	A	A	1416871_at	Adam8	a disintegrin and metallopeptidase domain 8	NM_001291066 /// NM_007403 /// XM_006536151 /// XM_006536152 /// XM_006536153 /// XR_389948	11501	ENSMUSG00000025473 /// OTTMUSG00000021266	chr7	139978901	139992535	-	0000902 // cell morphogenesis // inferred from mutant phenotype /// 0001525 // angiogenesis // inferred from direct assay /// 0002523 // leukocyte migration involved in inflammatory response // inferred from mutant phenotype /// 0002675 // positive regulation of acute inflammatory response // inferred from mutant phenotype /// 0002693 // positive regulation of cellular extravasation // inferred f…	0002102 // podosome // not recorded /// 0002102 // podosome // traceable author statement /// 0005737 // cytoplasm // not recorded /// 0005886 // plasma membrane // inferred from direct assay /// 0005886 // plasma membrane // not recorded /// 0005887 // integral component of plasma membrane // not recorded /// 0009986 // cell surface // not recorded /// 0016020 // membrane // inferred from electr…	0004222 // metalloendopeptidase activity // inferred from electronic annotation /// 0005178 // integrin binding // traceable author statement /// 0005509 // calcium ion binding // inferred from direct assay /// 0005515 // protein binding // inferred from physical interaction /// 0008233 // peptidase activity // inferred from electronic annotation /// 0008237 // metallopeptidase activity // inferr…	---
1416881_at	0.000744663	2.84352	11.664	11.2861	11.5596	P	P	P	10.0531	10.098	9.84956	P	P	P	1416881_at	Mcl1	myeloid cell leukemia sequence 1	NM_008562 /// XM_006501088	17210	ENSMUSG00000038612	chr3	95658791	95663179	+	0006915 // apoptotic process // inferred from electronic annotation /// 0007275 // multicellular organismal development // inferred from electronic annotation /// 0008630 // intrinsic apoptotic signaling pathway in response to DNA damage // inferred from direct assay /// 0008637 // apoptotic mitochondrial changes // inferred from direct assay /// 0030154 // cell differentiation // inferred from e…	0005634 // nucleus // inferred from direct assay /// 0005634 // nucleus // not recorded /// 0005654 // nucleoplasm // inferred from electronic annotation /// 0005737 // cytoplasm // inferred from direct assay /// 0005739 // mitochondrion // inferred from direct assay /// 0005739 // mitochondrion // not recorded /// 0005741 // mitochondrial outer membrane // not recorded /// 0005759 // mitochondri…	0005515 // protein binding // inferred from physical interaction /// 0042803 // protein homodimerization activity // not recorded /// 0046982 // protein heterodimerization activity // not recorded /// 0046983 // protein dimerization activity // not recorded /// 0051400 // BH domain binding // not recorded /// 0051434 // BH3 domain binding // inferred from physical interaction /// 0051434 // BH3 d…	Apoptosis_GenMAPP // GenMAPP /// Apoptosis_KEGG // GenMAPP
1416925_at	0.0372023	2.02192	11.1736	10.9524	10.4759	P	P	P	9.94967	9.8607	9.82681	P	P	P	1416925_at	Kpnb1	karyopherin (importin) beta 1	NM_008379 /// XM_006532307	16211	ENSMUSG00000001440 /// OTTMUSG00000002303	chr11	97159712	97187943	-	0006606 // protein import into nucleus // inferred from direct assay /// 0006606 // protein import into nucleus // not recorded /// 0006610 // ribosomal protein import into nucleus // inferred from direct assay /// 0006610 // ribosomal protein import into nucleus // not recorded /// 0006810 // transport // inferred from electronic annotation /// 0006886 // intracellular protein transport // infer…	0005622 // intracellular // inferred from direct assay /// 0005623 // cell // inferred from direct assay /// 0005634 // nucleus // not recorded /// 0005635 // nuclear envelope // not recorded /// 0005737 // cytoplasm // not recorded /// 0031965 // nuclear membrane // not recorded /// 0043234 // protein complex // inferred from direct assay /// 0070062 // extracellular vesicular exosome // not rec…	0005488 // binding // inferred from electronic annotation /// 0005515 // protein binding // inferred from physical interaction /// 0008536 // Ran GTPase binding // inferred from electronic annotation /// 0008565 // protein transporter activity // inferred from direct assay /// 0019899 // enzyme binding // not recorded /// 0019904 // protein domain specific binding // not recorded /// 0044822 // p…	---
1416930_at	0.0444424	0.334738	6.38827	5.71581	5.37765	P	P	A	8.1579	6.87001	7.00975	P	P	P	1416930_at	Ly6d	lymphocyte antigen 6 complex, locus D	NM_010742	17068	ENSMUSG00000034634	chr15	74752298	74763611	-	0030098 // lymphocyte differentiation // inferred from expression pattern /// 0035634 // response to stilbenoid // inferred from expression pattern	0005886 // plasma membrane // inferred from electronic annotation /// 0009986 // cell surface // inferred from direct assay /// 0016020 // membrane // inferred from electronic annotation /// 0031225 // anchored component of membrane // inferred from electronic annotation	---	---
1416935_at	0.0010805	2.66708	7.53036	7.93952	7.7774	M	P	P	6.48636	6.32886	6.2012	A	A	A	1416935_at	Trpv2	transient receptor potential cation channel, subfamily V, member 2	NM_011706 /// XM_006533165 /// XM_006533166	22368	ENSMUSG00000018507 /// OTTMUSG00000005868	chr11	62574535	62600307	+	0006810 // transport // inferred from electronic annotation /// 0006811 // ion transport // inferred from electronic annotation /// 0006812 // cation transport // not recorded /// 0006816 // calcium ion transport // inferred from electronic annotation /// 0006915 // apoptotic process // inferred from direct assay /// 0009266 // response to temperature stimulus // not recorded /// 0009408 // respo…	0005622 // intracellular // inferred from direct assay /// 0005737 // cytoplasm // inferred from electronic annotation /// 0005886 // plasma membrane // inferred from direct assay /// 0005886 // plasma membrane // not recorded /// 0009986 // cell surface // inferred from direct assay /// 0012505 // endomembrane system // not recorded /// 0016020 // membrane // inferred from electronic annotation …	0005216 // ion channel activity // inferred from electronic annotation /// 0005261 // cation channel activity // inferred from direct assay /// 0005261 // cation channel activity // not recorded /// 0005262 // calcium channel activity // inferred from direct assay /// 0005515 // protein binding // inferred from electronic annotation	---
1416953_at	0.000718516	4.32906	13.5897	13.0852	13.5319	P	P	P	11.1064	11.4971	11.2854	P	P	P	1416953_at	Ctgf	connective tissue growth factor	NM_010217	14219	ENSMUSG00000019997 /// OTTMUSG00000019709	chr10	24595512	24598683	+	0001502 // cartilage condensation // inferred from direct assay /// 0001503 // ossification // inferred from mutant phenotype /// 0001525 // angiogenesis // inferred from direct assay /// 0001525 // angiogenesis // inferred from mutant phenotype /// 0001558 // regulation of cell growth // inferred from electronic annotation /// 0001894 // tissue homeostasis // inferred from mutant phenotype /// 0…	0005576 // extracellular region // inferred from direct assay /// 0005578 // proteinaceous extracellular matrix // inferred from direct assay /// 0005615 // extracellular space // not recorded /// 0005794 // Golgi apparatus // not recorded /// 0005801 // cis-Golgi network // not recorded /// 0005829 // cytosol // not recorded /// 0005938 // cell cortex // not recorded /// 0043231 // intracellular…	0001968 // fibronectin binding // not recorded /// 0005178 // integrin binding // inferred from direct assay /// 0005515 // protein binding // inferred from electronic annotation /// 0005520 // insulin-like growth factor binding // inferred from electronic annotation /// 0008083 // growth factor activity // not recorded /// 0008201 // heparin binding // inferred from direct assay	---
1416962_at	0.0248823	2.1507	9.29116	8.76445	9.51886	P	P	P	7.97326	8.31578	8.04801	A	P	A	1416962_at	Rcc1	regulator of chromosome condensation 1	NM_001197082 /// NM_133878	100088	ENSMUSG00000028896 /// OTTMUSG00000009575	chr4	132331919	132348123	-	0000082 // G1/S transition of mitotic cell cycle // not recorded /// 0007049 // cell cycle // inferred from electronic annotation /// 0007052 // mitotic spindle organization // not recorded /// 0007059 // chromosome segregation // not recorded /// 0007067 // mitotic nuclear division // inferred from electronic annotation /// 0007088 // regulation of mitosis // not recorded /// 0032316 // regulati…	0000790 // nuclear chromatin // not recorded /// 0000794 // condensed nuclear chromosome // not recorded /// 0005634 // nucleus // not recorded /// 0005737 // cytoplasm // not recorded /// 0031965 // nuclear membrane // not recorded	0003677 // DNA binding // inferred from electronic annotation /// 0003682 // chromatin binding // not recorded /// 0005085 // guanyl-nucleotide exchange factor activity // inferred from electronic annotation /// 0005087 // Ran guanyl-nucleotide exchange factor activity // inferred from direct assay /// 0005087 // Ran guanyl-nucleotide exchange factor activity // not recorded /// 0005515 // protei…	---
1416975_at	0.0245472	2.65185	8.30113	8.24661	7.37741	P	P	P	6.22833	6.80815	6.77003	P	P	P	1416975_at	Stam2	signal transducing adaptor molecule (SH3 domain and ITAM motif) 2	NM_019667 /// XM_006498198 /// XM_006498199	56324	ENSMUSG00000055371 /// OTTMUSG00000012637	chr2	52691657	52742214	-	0006810 // transport // inferred from electronic annotation /// 0006886 // intracellular protein transport // inferred from electronic annotation /// 0015031 // protein transport // inferred from electronic annotation	0005634 // nucleus // not recorded /// 0005737 // cytoplasm // not recorded /// 0005768 // endosome // inferred from electronic annotation /// 0016020 // membrane // inferred from electronic annotation /// 0031901 // early endosome membrane // inferred from electronic annotation /// 0043231 // intracellular membrane-bounded organelle // not recorded	0005515 // protein binding // inferred from physical interaction	---
1416995_at	0.0413251	2.24515	8.33798	7.38398	7.90473	P	P	P	6.40917	6.42666	7.26912	A	A	A	1416995_at	Pacsin3	protein kinase C and casein kinase substrate in neurons 3	NM_001289677 /// NM_001289678 /// NM_028733 /// NM_030880 /// XM_006500422 /// XM_006500423 /// XM_006500424 /// XM_006500425 /// XM_006500426 /// XM_006500427 /// XM_006500428 /// XM_006500429	80708	ENSMUSG00000027257 /// OTTMUSG00000014429	chr2	91257328	91264679	+	0006897 // endocytosis // inferred from electronic annotation /// 0016310 // phosphorylation // inferred from electronic annotation /// 0045806 // negative regulation of endocytosis // inferred from direct assay /// 0045806 // negative regulation of endocytosis // inferred from mutant phenotype /// 0051044 // positive regulation of membrane protein ectodomain proteolysis // not recorded /// 00519…	0005737 // cytoplasm // inferred from direct assay /// 0005802 // trans-Golgi network // inferred from direct assay /// 0005886 // plasma membrane // inferred from electronic annotation /// 0016020 // membrane // inferred from electronic annotation /// 0070062 // extracellular vesicular exosome // not recorded	0005515 // protein binding // inferred from physical interaction /// 0008092 // cytoskeletal protein binding // inferred from direct assay /// 0008289 // lipid binding // inferred from direct assay /// 0008289 // lipid binding // not recorded /// 0016301 // kinase activity // inferred from electronic annotation /// 0016740 // transferase activity // inferred from electronic annotation /// 0019855…	---
1416996_at	0.0152554	2.26888	8.76275	8.30077	9.00158	P	P	P	7.74757	7.09934	7.67458	P	P	P	1416996_at	Tbc1d8	TBC1 domain family, member 8	NM_018775 /// XM_006496146 /// XM_006496147 /// XM_006496148	54610	ENSMUSG00000003134	chr1	39371498	39478716	-	0032313 // regulation of Rab GTPase activity // inferred from electronic annotation /// 0032851 // positive regulation of Rab GTPase activity // inferred from electronic annotation /// 0043547 // positive regulation of GTPase activity // inferred from electronic annotation	---	0005096 // GTPase activator activity // inferred from electronic annotation /// 0005097 // Rab GTPase activator activity // inferred from electronic annotation /// 0005509 // calcium ion binding // inferred from electronic annotation	Cell_Cycle_KEGG // GenMAPP
1417003_at	0.00257379	0.460735	6.08015	6.35846	6.13875	P	P	P	7.26048	7.1212	7.53386	P	P	P	1417003_at	0610012G03Rik	RIKEN cDNA 0610012G03 gene	NM_025320 /// NR_027897	106264	---	chr16	31947050	31948521	-	---	---	---	---
1417047_at	0.0360923	0.433079	7.8586	6.94241	7.84791	P	P	P	8.96719	8.30506	9.06373	P	P	P	1417047_at	Prom2	prominin 2	NM_138750 /// NM_178047	192212	ENSMUSG00000027376 /// OTTMUSG00000016031	chr2	127526946	127541467	-	0001934 // positive regulation of protein phosphorylation // not recorded /// 0031346 // positive regulation of cell projection organization // not recorded /// 0043088 // regulation of Cdc42 GTPase activity // not recorded /// 0048550 // negative regulation of pinocytosis // not recorded /// 2001287 // negative regulation of caveolin-mediated endocytosis // not recorded	0005886 // plasma membrane // inferred from direct assay /// 0005887 // integral component of plasma membrane // not recorded /// 0005887 // integral component of plasma membrane // inferred from sequence or structural similarity /// 0005902 // microvillus // not recorded /// 0005902 // microvillus // inferred from sequence or structural similarity /// 0005929 // cilium // not recorded /// 000592…	0015485 // cholesterol binding // not recorded /// 0015485 // cholesterol binding // inferred from sequence or structural similarity	---
1417065_at	0.0162053	21.7887	12.1547	11.5886	13.6713	P	P	P	8.4959	8.40623	7.96041	P	P	P	1417065_at	Egr1	early growth response 1	NM_007913	13653	ENSMUSG00000038418 /// OTTMUSG00000021064	chr18	34859822	34864984	+	0000122 // negative regulation of transcription from RNA polymerase II promoter // inferred from direct assay /// 0001975 // response to amphetamine // inferred from electronic annotation /// 0006351 // transcription, DNA-templated // inferred from electronic annotation /// 0006355 // regulation of transcription, DNA-templated // inferred from mutant phenotype /// 0006366 // transcription from RN…	0005634 // nucleus // inferred from direct assay /// 0005634 // nucleus // not recorded /// 0005737 // cytoplasm // not recorded	0000976 // transcription regulatory region sequence-specific DNA binding // not recorded /// 0000977 // RNA polymerase II regulatory region sequence-specific DNA binding // not recorded /// 0000979 // RNA polymerase II core promoter sequence-specific DNA binding // not recorded /// 0000982 // RNA polymerase II core promoter proximal region sequence-specific DNA binding transcription factor activi…	Ovarian_Infertility_Genes // GenMAPP
1417096_at	0.0027382	2.02648	9.12502	9.21139	8.83376	P	P	P	7.96848	7.94379	8.21199	P	P	M	1417096_at	Rrp15	ribosomal RNA processing 15 homolog (S. cerevisiae)	NM_026041	67223	ENSMUSG00000001305 /// OTTMUSG00000034905	chr1	186720977	186749335	-	---	0005634 // nucleus // not recorded /// 0005730 // nucleolus // not recorded /// 0005739 // mitochondrion // not recorded	---	---
1417109_at	0.0313133	3.2578	11.1499	11.2839	10.0512	P	P	P	9.39745	8.51385	9.54799	P	P	P	1417109_at	Tinagl1	tubulointerstitial nephritis antigen-like 1	NM_001168333 /// NM_023476	94242	ENSMUSG00000028776 /// OTTMUSG00000009561	chr4	130165600	130175122	-	0006508 // proteolysis // inferred from electronic annotation /// 0006898 // receptor-mediated endocytosis // inferred from electronic annotation /// 0006955 // immune response // inferred from electronic annotation	0005576 // extracellular region // inferred from electronic annotation /// 0005737 // cytoplasm // inferred from direct assay /// 0031012 // extracellular matrix // not recorded /// 0070062 // extracellular vesicular exosome // not recorded	0005044 // scavenger receptor activity // inferred from electronic annotation /// 0008234 // cysteine-type peptidase activity // inferred from electronic annotation /// 0030247 // polysaccharide binding // inferred from electronic annotation /// 0043236 // laminin binding // inferred from physical interaction	---
1417128_at	0.0164729	3.7867	8.95159	9.18465	8.95619	P	P	P	6.50379	7.15791	7.50806	P	P	P	1417128_at	Plekho1	pleckstrin homology domain containing, family O member 1	NM_023320 /// XM_006501930	67220	ENSMUSG00000015745 /// OTTMUSG00000022186	chr3	95988827	95996109	-	---	0005634 // nucleus // inferred from electronic annotation /// 0005737 // cytoplasm // inferred from electronic annotation /// 0016020 // membrane // inferred from electronic annotation	0005515 // protein binding // inferred from electronic annotation /// 0005543 // phospholipid binding // inferred from electronic annotation	---
1417130_s_at	0.030075	4.80235	11.5327	12.1085	13.0395	P	P	P	9.81973	10.2978	10.1385	P	P	P	1417130_s_at	Angptl4	angiopoietin-like 4	NM_020581	57875	ENSMUSG00000002289 /// OTTMUSG00000037206	chr17	33774899	33781530	-	0001525 // angiogenesis // inferred from electronic annotation /// 0001666 // response to hypoxia // inferred from electronic annotation /// 0009267 // cellular response to starvation // non-traceable author statement /// 0043066 // negative regulation of apoptotic process // inferred from direct assay /// 0043066 // negative regulation of apoptotic process // not recorded /// 0043086 // negative…	0005576 // extracellular region // inferred from direct assay /// 0005576 // extracellular region // not recorded /// 0005578 // proteinaceous extracellular matrix // inferred from electronic annotation /// 0005615 // extracellular space // inferred from direct assay /// 0005615 // extracellular space // not recorded /// 0072562 // blood microparticle // not recorded	0004857 // enzyme inhibitor activity // inferred from direct assay /// 0005515 // protein binding // inferred from electronic annotation	---
1417150_at	0.0127325	0.307629	5.5284	5.83216	6.43564	A	A	A	7.5862	7.89287	7.54507	P	P	P	1417150_at	Slc6a4	solute carrier family 6 (neurotransmitter transporter, serotonin), member 4	NM_010484 /// XM_006532299 /// XM_006532300 /// XM_006532301 /// XM_006532302	15567	ENSMUSG00000020838 /// OTTMUSG00000006240	chr11	76998596	77032343	+	0001666 // response to hypoxia // inferred from electronic annotation /// 0006810 // transport // inferred from electronic annotation /// 0006836 // neurotransmitter transport // inferred from electronic annotation /// 0006837 // serotonin transport // inferred from mutant phenotype /// 0006837 // serotonin transport // not recorded /// 0007420 // brain development // inferred from electronic ann…	0005768 // endosome // inferred from electronic annotation /// 0005829 // cytosol // not recorded /// 0005886 // plasma membrane // not recorded /// 0005887 // integral component of plasma membrane // inferred from electronic annotation /// 0010008 // endosome membrane // inferred from electronic annotation /// 0012505 // endomembrane system // not recorded /// 0016020 // membrane // inferred fro…	0005328 // neurotransmitter:sodium symporter activity // inferred from electronic annotation /// 0005335 // serotonin:sodium symporter activity // not recorded /// 0005515 // protein binding // inferred from physical interaction /// 0008504 // monoamine transmembrane transporter activity // not recorded /// 0015222 // serotonin transmembrane transporter activity // not recorded /// 0015293 // sym…	---
1417156_at	0.00402908	2.70642	9.0529	8.46361	8.58363	P	P	P	7.5632	7.07587	7.17394	P	P	P	1417156_at	Krt19	keratin 19	NM_008471	16669	ENSMUSG00000020911 /// OTTMUSG00000002545	chr11	100140809	100146120	-	0043627 // response to estrogen // inferred from electronic annotation /// 0045214 // sarcomere organization // not recorded /// 0060706 // cell differentiation involved in embryonic placenta development // inferred from genetic interaction	0005882 // intermediate filament // inferred from electronic annotation /// 0016010 // dystrophin-associated glycoprotein complex // not recorded /// 0030018 // Z disc // inferred from direct assay /// 0042383 // sarcolemma // inferred from direct assay /// 0043034 // costamere // not recorded /// 0070062 // extracellular vesicular exosome // not recorded /// 0071944 // cell periphery // not reco…	0005198 // structural molecule activity // inferred from electronic annotation /// 0005515 // protein binding // inferred from electronic annotation /// 0008307 // structural constituent of muscle // not recorded /// 0032403 // protein complex binding // not recorded	---
1417162_at	0.0278113	2.24802	11.339	11.2587	11.154	P	P	P	10.3813	9.62188	10.1476	P	P	P	1417162_at	Tmbim1	transmembrane BAX inhibitor motif containing 1	NM_027154 /// XM_006496259 /// XM_006496260	69660	ENSMUSG00000006301 /// OTTMUSG00000021738	chr1	74288246	74303941	-	0048553 // negative regulation of metalloenzyme activity // inferred from mutant phenotype /// 0050848 // regulation of calcium-mediated signaling // inferred from sequence or structural similarity /// 0090005 // negative regulation of establishment of protein localization to plasma membrane // inferred from sequence or structural similarity /// 1902042 // negative regulation of extrinsic apoptot…	0005764 // lysosome // inferred from electronic annotation /// 0005765 // lysosomal membrane // not recorded /// 0005768 // endosome // inferred from electronic annotation /// 0005794 // Golgi apparatus // inferred from sequence or structural similarity /// 0010008 // endosome membrane // not recorded /// 0016020 // membrane // inferred from electronic annotation /// 0016021 // integral component…	0005123 // death receptor binding // inferred from sequence or structural similarity	---
1417164_at	0.0137867	3.42187	8.1714	7.34339	7.27713	P	P	P	5.96835	6.26681	5.22594	A	A	A	1417164_at	Dusp10	dual specificity phosphatase 10	NM_022019 /// XM_006497188 /// XM_006497189 /// XM_006497190	63953	ENSMUSG00000039384 /// OTTMUSG00000033984	chr1	184034445	184075643	+	0000188 // inactivation of MAPK activity // not recorded /// 0002819 // regulation of adaptive immune response // inferred from mutant phenotype /// 0006470 // protein dephosphorylation // not recorded /// 0010033 // response to organic substance // inferred from electronic annotation /// 0016311 // dephosphorylation // inferred from electronic annotation /// 0032496 // response to lipopolysaccha…	0005634 // nucleus // not recorded /// 0005737 // cytoplasm // inferred from electronic annotation /// 0005794 // Golgi apparatus // not recorded	0004721 // phosphoprotein phosphatase activity // inferred from electronic annotation /// 0004725 // protein tyrosine phosphatase activity // inferred from electronic annotation /// 0008138 // protein tyrosine/serine/threonine phosphatase activity // not recorded /// 0016787 // hydrolase activity // inferred from electronic annotation /// 0016791 // phosphatase activity // not recorded /// 001701…	---
1417168_a_at	0.0115388	0.369736	10.4205	10.6243	11.1155	P	P	P	12.1416	12.3285	12.0751	P	P	P	1417168_a_at	Usp2	ubiquitin specific peptidase 2	NM_016808 /// NM_198091 /// NM_198092 /// XM_006510480 /// XM_006510481 /// XM_006510482 /// XM_006510483 /// XM_006510484 /// XM_006510485 /// XM_006510486	53376	ENSMUSG00000032010 /// OTTMUSG00000042086	chr9	44069449	44095625	+	0000122 // negative regulation of transcription from RNA polymerase II promoter // not recorded /// 0006508 // proteolysis // not recorded /// 0006511 // ubiquitin-dependent protein catabolic process // inferred from electronic annotation /// 0007049 // cell cycle // inferred from electronic annotation /// 0007517 // muscle organ development // inferred from electronic annotation /// 0016579 // p…	0005634 // nucleus // not recorded /// 0005737 // cytoplasm // inferred from direct assay /// 0005813 // centrosome // not recorded /// 0005938 // cell cortex // inferred from direct assay /// 0048471 // perinuclear region of cytoplasm // inferred from direct assay /// 0048471 // perinuclear region of cytoplasm // not recorded	0004221 // ubiquitin thiolesterase activity // not recorded /// 0004843 // ubiquitin-specific protease activity // not recorded /// 0005515 // protein binding // inferred from electronic annotation /// 0008233 // peptidase activity // inferred from electronic annotation /// 0008234 // cysteine-type peptidase activity // inferred from electronic annotation /// 0016787 // hydrolase activity // infe…	---
1417169_at	0.00215249	0.342525	10.4008	10.7508	10.9425	P	P	P	12.4693	12.3107	11.9557	P	P	P	1417169_at	Usp2	ubiquitin specific peptidase 2	NM_016808 /// NM_198091 /// NM_198092 /// XM_006510480 /// XM_006510481 /// XM_006510482 /// XM_006510483 /// XM_006510484 /// XM_006510485 /// XM_006510486	53376	ENSMUSG00000032010 /// OTTMUSG00000042086	chr9	44069449	44095625	+	0000122 // negative regulation of transcription from RNA polymerase II promoter // not recorded /// 0006508 // proteolysis // not recorded /// 0006511 // ubiquitin-dependent protein catabolic process // inferred from electronic annotation /// 0007049 // cell cycle // inferred from electronic annotation /// 0007517 // muscle organ development // inferred from electronic annotation /// 0016579 // p…	0005634 // nucleus // not recorded /// 0005737 // cytoplasm // inferred from direct assay /// 0005813 // centrosome // not recorded /// 0005938 // cell cortex // inferred from direct assay /// 0048471 // perinuclear region of cytoplasm // inferred from direct assay /// 0048471 // perinuclear region of cytoplasm // not recorded	0004221 // ubiquitin thiolesterase activity // not recorded /// 0004843 // ubiquitin-specific protease activity // not recorded /// 0005515 // protein binding // inferred from electronic annotation /// 0008233 // peptidase activity // inferred from electronic annotation /// 0008234 // cysteine-type peptidase activity // inferred from electronic annotation /// 0016787 // hydrolase activity // infe…	---
1417176_at	0.00506263	3.30142	8.53329	8.13748	8.93487	P	P	P	6.6317	6.65371	7.18893	P	P	P	1417176_at	Csnk1e	casein kinase 1, epsilon	NM_001289898 /// NM_001289899 /// NM_013767 /// XM_006521037 /// XM_006521038 /// XM_006521039 /// XM_006521040 /// XM_006521041 /// XM_006521042 /// XM_006521043 /// XM_006521044 /// XM_006521045 /// XM_006521046 /// XM_006521047	27373	ENSMUSG00000022433 /// OTTMUSG00000029589	chr15	79417851	79438859	-	0006468 // protein phosphorylation // inferred from direct assay /// 0006468 // protein phosphorylation // inferred from mutant phenotype /// 0006468 // protein phosphorylation // not recorded /// 0007623 // circadian rhythm // traceable author statement /// 0016055 // Wnt signaling pathway // inferred from electronic annotation /// 0016310 // phosphorylation // inferred from electronic annotatio…	0005634 // nucleus // inferred from direct assay /// 0005634 // nucleus // not recorded /// 0005654 // nucleoplasm // traceable author statement /// 0005737 // cytoplasm // not recorded /// 0005829 // cytosol // traceable author statement /// 0030529 // ribonucleoprotein complex // inferred from direct assay	0000166 // nucleotide binding // inferred from electronic annotation /// 0004672 // protein kinase activity // inferred from direct assay /// 0004674 // protein serine/threonine kinase activity // not recorded /// 0004713 // protein tyrosine kinase activity // inferred from electronic annotation /// 0005515 // protein binding // inferred from physical interaction /// 0005524 // ATP binding // inf…	Wnt_Signaling // GenMAPP
1417197_at	0.0227486	2.25747	7.84778	8.51475	8.64355	P	P	P	6.81738	7.2705	7.44328	P	P	P	1417197_at	Wwc2	WW, C2 and coiled-coil domain containing 2	NM_133791	52357	ENSMUSG00000031563	chr8	47826018	47990918	-	---	---	0005515 // protein binding // inferred from electronic annotation	---
1417208_at	0.0421556	0.358784	10.8611	11.2929	12.0946	P	P	P	12.8039	13.1132	13.0286	P	P	P	1417208_at	Amacr	alpha-methylacyl-CoA racemase	NM_008537	17117	ENSMUSG00000022244	chr15	10981741	10995606	+	0006631 // fatty acid metabolic process // inferred from electronic annotation /// 0006699 // bile acid biosynthetic process // not recorded /// 0008152 // metabolic process // inferred from electronic annotation /// 0008206 // bile acid metabolic process // not recorded /// 0008300 // isoprenoid catabolic process // traceable author statement	0005737 // cytoplasm // not recorded /// 0005739 // mitochondrion // inferred from direct assay /// 0005739 // mitochondrion // not recorded /// 0005777 // peroxisome // not recorded	0003824 // catalytic activity // inferred from electronic annotation /// 0005102 // receptor binding // not recorded /// 0008111 // alpha-methylacyl-CoA racemase activity // not recorded /// 0008111 // alpha-methylacyl-CoA racemase activity // traceable author statement /// 0016853 // isomerase activity // inferred from electronic annotation	---
1417209_at	0.016948	2.67978	9.07662	8.9849	9.36284	P	P	P	7.18358	8.02316	7.8501	P	P	P	1417209_at	Sertad2	SERTA domain containing 2	NM_001038625 /// NM_021372 /// XM_006514764 /// XM_006514765 /// XM_006514766	58172	ENSMUSG00000049800 /// OTTMUSG00000005229	chr11	20543286	20649145	+	0006351 // transcription, DNA-templated // inferred from electronic annotation /// 0006355 // regulation of transcription, DNA-templated // inferred from electronic annotation /// 0030308 // negative regulation of cell growth // not recorded /// 0045893 // positive regulation of transcription, DNA-templated // inferred from direct assay	0005634 // nucleus // not recorded /// 0005737 // cytoplasm // inferred from electronic annotation	0003713 // transcription coactivator activity // inferred from direct assay /// 0005515 // protein binding // inferred from physical interaction	---
1417211_a_at	0.00301917	0.405334	10.0207	10.2499	10.5326	P	P	P	11.6922	11.6642	11.381	P	P	P	1417211_a_at	1110032A03Rik	RIKEN cDNA 1110032A03 gene	NM_023483 /// XM_006510577 /// XM_006510578 /// XM_006510579 /// XM_006510580	68721	ENSMUSG00000037971 /// OTTMUSG00000042097	chr9	50763699	50768452	-	---	0005634 // nucleus // not recorded	---	---
1417221_at	0.0439164	0.436448	3.83199	4.59564	4.09652	M	A	A	5.23847	4.85452	5.91985	P	P	P	1417221_at	Ppm1a	protein phosphatase 1A, magnesium dependent, alpha isoform	NM_008910 /// XM_006515600 /// XM_006515601 /// XM_006515602 /// XM_006515603	19042	ENSMUSG00000021096	chr12	72761293	72795316	+	0006470 // protein dephosphorylation // inferred from direct assay /// 0006470 // protein dephosphorylation // inferred from mutant phenotype /// 0006470 // protein dephosphorylation // not recorded /// 0006499 // N-terminal protein myristoylation // inferred from direct assay /// 0010991 // negative regulation of SMAD protein complex assembly // not recorded /// 0016055 // Wnt signaling pathway …	0005634 // nucleus // not recorded /// 0005737 // cytoplasm // inferred from electronic annotation /// 0005829 // cytosol // inferred from direct assay /// 0005891 // voltage-gated calcium channel complex // not recorded /// 0016020 // membrane // inferred from direct assay /// 0043005 // neuron projection // not recorded	0000287 // magnesium ion binding // inferred from electronic annotation /// 0003824 // catalytic activity // inferred from electronic annotation /// 0004721 // phosphoprotein phosphatase activity // inferred from direct assay /// 0004722 // protein serine/threonine phosphatase activity // not recorded /// 0004871 // signal transducer activity // not recorded /// 0005515 // protein binding // infe…	---
1417225_at	0.0317307	2.35103	10.9024	11.2231	11.8361	P	P	P	10.5438	10.098	9.63889	P	P	P	1417225_at	Arl6ip5	ADP-ribosylation factor-like 6 interacting protein 5	NM_022992	65106	ENSMUSG00000035199 /// OTTMUSG00000023411	chr6	97210739	97233371	+	0008631 // intrinsic apoptotic signaling pathway in response to oxidative stress // not recorded /// 0010917 // negative regulation of mitochondrial membrane potential // not recorded /// 0015813 // L-glutamate transport // inferred from direct assay /// 0032874 // positive regulation of stress-activated MAPK cascade // not recorded /// 0043065 // positive regulation of apoptotic process // not r…	0005737 // cytoplasm // not recorded /// 0005783 // endoplasmic reticulum // not recorded /// 0005789 // endoplasmic reticulum membrane // inferred from electronic annotation /// 0005856 // cytoskeleton // inferred from electronic annotation /// 0016020 // membrane // not recorded /// 0016021 // integral component of membrane // inferred from electronic annotation	0005515 // protein binding // inferred from physical interaction /// 0008022 // protein C-terminus binding // not recorded	---
1417240_at	0.0452365	3.02217	10.0686	9.77763	8.89207	P	P	P	7.93602	8.05794	8.18778	P	P	P	1417240_at	Zyx	zyxin	NM_001289617 /// NM_001289618 /// NM_001289619 /// NM_011777 /// XM_006505936 /// XM_006505937	22793	ENSMUSG00000029860	chr6	42349827	42358624	+	0007155 // cell adhesion // inferred from electronic annotation /// 0050727 // regulation of inflammatory response // inferred from electronic annotation	0001725 // stress fiber // not recorded /// 0005634 // nucleus // inferred from electronic annotation /// 0005737 // cytoplasm // not recorded /// 0005856 // cytoskeleton // inferred from electronic annotation /// 0005913 // cell-cell adherens junction // not recorded /// 0005925 // focal adhesion // not recorded /// 0030054 // cell junction // inferred from electronic annotation	0005515 // protein binding // inferred from physical interaction /// 0008270 // zinc ion binding // inferred from electronic annotation /// 0044822 // poly(A) RNA binding // not recorded /// 0046872 // metal ion binding // inferred from electronic annotation	Integrin-mediated_cell_adhesion_KEGG // GenMAPP
1417268_at	0.000334011	5.25091	11.133	10.9669	10.881	P	P	P	8.4943	8.44034	8.84568	P	P	P	1417268_at	Cd14	CD14 antigen	NM_009841	12475	ENSMUSG00000051439	chr18	36725063	36726745	-	0002237 // response to molecule of bacterial origin // inferred from direct assay /// 0002376 // immune system process // inferred from electronic annotation /// 0006954 // inflammatory response // not recorded /// 0009408 // response to heat // inferred from electronic annotation /// 0032026 // response to magnesium ion // inferred from electronic annotation /// 0032496 // response to lipopolysa…	0005615 // extracellular space // not recorded /// 0005886 // plasma membrane // not recorded /// 0009986 // cell surface // not recorded /// 0016020 // membrane // inferred from electronic annotation /// 0031225 // anchored component of membrane // inferred from electronic annotation /// 0045121 // membrane raft // inferred from direct assay /// 0070062 // extracellular vesicular exosome // not …	0001530 // lipopolysaccharide binding // not recorded /// 0005515 // protein binding // inferred from electronic annotation /// 0070891 // lipoteichoic acid binding // not recorded	---
1417269_at	0.0199091	2.32116	11.4327	11.3377	12.1037	P	P	P	10.0848	10.3992	10.7859	P	P	P	1417269_at	Cdk9	cyclin-dependent kinase 9 (CDC2-related kinase)	NM_130860	107951	ENSMUSG00000009555 /// OTTMUSG00000012534	chr2	32707437	32712758	-	0006281 // DNA repair // inferred from electronic annotation /// 0006282 // regulation of DNA repair // not recorded /// 0006351 // transcription, DNA-templated // inferred from electronic annotation /// 0006355 // regulation of transcription, DNA-templated // inferred from electronic annotation /// 0006468 // protein phosphorylation // not recorded /// 0006974 // cellular response to DNA damage …	0005634 // nucleus // inferred from direct assay /// 0005634 // nucleus // not recorded /// 0005737 // cytoplasm // inferred from electronic annotation /// 0008024 // positive transcription elongation factor complex b // inferred from direct assay /// 0008024 // positive transcription elongation factor complex b // not recorded /// 0008024 // positive transcription elongation factor complex b // …	0000166 // nucleotide binding // inferred from electronic annotation /// 0003677 // DNA binding // not recorded /// 0003682 // chromatin binding // inferred from direct assay /// 0004672 // protein kinase activity // inferred from electronic annotation /// 0004674 // protein serine/threonine kinase activity // inferred from electronic annotation /// 0004693 // cyclin-dependent protein serine/thre…	mRNA_processing_binding_Reactome // GenMAPP
1417273_at	0.0465346	27.9933	12.172	12.2148	15.149	P	P	P	9.42373	8.64865	9.08859	P	P	P	1417273_at	Pdk4	pyruvate dehydrogenase kinase, isoenzyme 4	NM_013743	27273	ENSMUSG00000019577 /// OTTMUSG00000026853	chr6	5483350	5496311	-	0005975 // carbohydrate metabolic process // inferred from electronic annotation /// 0006006 // glucose metabolic process // inferred from electronic annotation /// 0006086 // acetyl-CoA biosynthetic process from pyruvate // traceable author statement /// 0006468 // protein phosphorylation // not recorded /// 0006468 // protein phosphorylation // traceable author statement /// 0006885 // regulati…	0005739 // mitochondrion // inferred from direct assay /// 0005739 // mitochondrion // not recorded /// 0005743 // mitochondrial inner membrane // inferred from direct assay /// 0005759 // mitochondrial matrix // inferred from electronic annotation	0000166 // nucleotide binding // inferred from electronic annotation /// 0004672 // protein kinase activity // not recorded /// 0004674 // protein serine/threonine kinase activity // inferred from electronic annotation /// 0004712 // protein serine/threonine/tyrosine kinase activity // traceable author statement /// 0004740 // pyruvate dehydrogenase (acetyl-transferring) kinase activity // not re…	Krebs-TCA_Cycle // GenMAPP
1417290_at	0.0281472	3.87181	8.23301	9.67191	8.66422	P	P	P	6.59548	6.89017	7.47449	M	P	P	1417290_at	Lrg1	leucine-rich alpha-2-glycoprotein 1	NM_029796	76905	ENSMUSG00000037095	chr17	56119675	56122001	-	0001938 // positive regulation of endothelial cell proliferation // inferred from mutant phenotype /// 0030511 // positive regulation of transforming growth factor beta receptor signaling pathway // inferred from genetic interaction /// 0045766 // positive regulation of angiogenesis // inferred from direct assay /// 0045766 // positive regulation of angiogenesis // inferred from genetic interacti…	0005615 // extracellular space // inferred from direct assay /// 0005615 // extracellular space // not recorded	0005160 // transforming growth factor beta receptor binding // inferred from physical interaction /// 0005515 // protein binding // inferred from electronic annotation	---
1417291_at	0.0136349	2.25441	11.3508	11.5962	10.9162	P	P	P	10.345	9.99341	10.0621	P	P	P	1417291_at	Tnfrsf1a	tumor necrosis factor receptor superfamily, member 1a	NM_011609	21937	ENSMUSG00000030341 /// OTTMUSG00000023806	chr6	125349729	125362483	+	0001666 // response to hypoxia // inferred from electronic annotation /// 0006693 // prostaglandin metabolic process // traceable author statement /// 0006915 // apoptotic process // inferred from electronic annotation /// 0006952 // defense response // inferred from mutant phenotype /// 0006954 // inflammatory response // inferred from mutant phenotype /// 0007165 // signal transduction // infer…	0000139 // Golgi membrane // not recorded /// 0005615 // extracellular space // not recorded /// 0005622 // intracellular // inferred from mutant phenotype /// 0005634 // nucleus // not recorded /// 0005794 // Golgi apparatus // inferred from electronic annotation /// 0005886 // plasma membrane // traceable author statement /// 0009986 // cell surface // inferred from direct assay /// 0009986 // …	0002020 // protease binding // not recorded /// 0005031 // tumor necrosis factor-activated receptor activity // inferred from mutant phenotype /// 0005031 // tumor necrosis factor-activated receptor activity // inferred from physical interaction /// 0005031 // tumor necrosis factor-activated receptor activity // not recorded /// 0005031 // tumor necrosis factor-activated receptor activity // trac…	Apoptosis // GenMAPP /// Apoptosis_GenMAPP // GenMAPP /// Apoptosis_KEGG // GenMAPP /// Inflammatory_Response_Pathway // GenMAPP /// Prostaglandin_synthesis_regulation // GenMAPP
1417297_at	0.00965371	3.13316	8.38633	8.09584	7.78811	P	P	P	5.88059	6.67513	6.69424	A	P	A	1417297_at	Itpr3	inositol 1,4,5-triphosphate receptor 3	NM_080553 /// XM_006523712	16440	ENSMUSG00000042644 /// OTTMUSG00000031360	chr17	27110581	27122222	+	0006810 // transport // inferred from electronic annotation /// 0006811 // ion transport // inferred from electronic annotation /// 0006816 // calcium ion transport // inferred from direct assay /// 0007186 // G-protein coupled receptor signaling pathway // not recorded /// 0007204 // positive regulation of cytosolic calcium ion concentration // not recorded /// 0007613 // memory // inferred from…	0005634 // nucleus // inferred from direct assay /// 0005635 // nuclear envelope // not recorded /// 0005640 // nuclear outer membrane // not recorded /// 0005654 // nucleoplasm // inferred from direct assay /// 0005730 // nucleolus // inferred from direct assay /// 0005737 // cytoplasm // inferred from direct assay /// 0005737 // cytoplasm // not recorded /// 0005783 // endoplasmic reticulum // …	0000822 // inositol hexakisphosphate binding // not recorded /// 0005216 // ion channel activity // inferred from electronic annotation /// 0005218 // intracellular ligand-gated calcium channel activity // inferred from direct assay /// 0005220 // inositol 1,4,5-trisphosphate-sensitive calcium-release channel activity // inferred from direct assay /// 0005220 // inositol 1,4,5-trisphosphate-sensi…	Calcium_regulation_in_cardiac_cells // GenMAPP /// Smooth_muscle_contraction // GenMAPP
1417307_at	0.0189797	0.486489	8.11919	7.91136	7.44035	P	P	P	8.77292	8.60345	9.22168	P	P	P	1417307_at	Dmd	dystrophin, muscular dystrophy	NM_007868 /// XM_006527763 /// XM_006527764 /// XM_006527765 /// XM_006527766 /// XM_006527767 /// XM_006527768 /// XM_006527769 /// XM_006527770 /// XM_006527771 /// XM_006527772 /// XM_006527773 /// XM_006527774 /// XM_006527775 /// XM_006527776 /// XM_006527777	13405	ENSMUSG00000045103 /// OTTMUSG00000017938	chrX	82948869	85205050	+	0001954 // positive regulation of cell-matrix adhesion // inferred from mutant phenotype /// 0002027 // regulation of heart rate // inferred from mutant phenotype /// 0002027 // regulation of heart rate // not recorded /// 0006355 // regulation of transcription, DNA-templated // inferred from mutant phenotype /// 0007517 // muscle organ development // inferred from mutant phenotype /// 0007519 //…	0005622 // intracellular // inferred from mutant phenotype /// 0005634 // nucleus // not recorded /// 0005737 // cytoplasm // inferred from electronic annotation /// 0005856 // cytoskeleton // inferred from electronic annotation /// 0005886 // plasma membrane // inferred from direct assay /// 0009986 // cell surface // not recorded /// 0016010 // dystrophin-associated glycoprotein complex // infe…	0002162 // dystroglycan binding // not recorded /// 0003779 // actin binding // not recorded /// 0005509 // calcium ion binding // inferred from electronic annotation /// 0005515 // protein binding // inferred from physical interaction /// 0008270 // zinc ion binding // inferred from electronic annotation /// 0008307 // structural constituent of muscle // not recorded /// 0017022 // myosin bindin…	Striated_muscle_contraction // GenMAPP
1417316_at	0.0216077	0.491558	11.5101	12.1433	12.0626	P	P	P	13.0967	12.9491	12.808	P	P	P	1417316_at	Acot13	acyl-CoA thioesterase 13	NM_025790	66834	ENSMUSG00000006717 /// OTTMUSG00000000608	chr13	24817947	24831525	-	0008152 // metabolic process // not recorded /// 0051289 // protein homotetramerization // not recorded	0005634 // nucleus // not recorded /// 0005737 // cytoplasm // inferred from electronic annotation /// 0005739 // mitochondrion // inferred from direct assay /// 0005819 // spindle // inferred from electronic annotation /// 0005829 // cytosol // inferred from electronic annotation /// 0005856 // cytoskeleton // inferred from electronic annotation	0016289 // CoA hydrolase activity // inferred from electronic annotation /// 0016787 // hydrolase activity // inferred from electronic annotation /// 0034843 // 2-oxoglutaryl-CoA thioesterase activity // inferred from electronic annotation /// 0034869 // 2,4,4-trimethyl-3-oxopentanoyl-CoA thioesterase activity // inferred from electronic annotation /// 0034946 // 3-isopropylbut-3-enoyl-CoA thioes…	---
1417328_at	0.00919023	4.15063	10.1261	9.29274	9.11861	P	P	P	7.30086	7.33693	7.876	P	P	P	1417328_at	Ercc1	excision repair cross-complementing rodent repair deficiency, complementation group 1	NM_001127324 /// NM_007948 /// XM_006539539	13870	ENSMUSG00000003549 /// OTTMUSG00000030622	chr7	19345086	19356524	+	0000720 // pyrimidine dimer repair by nucleotide-excision repair // inferred from mutant phenotype /// 0000737 // DNA catabolic process, endonucleolytic // not recorded /// 0001302 // replicative cell aging // inferred from mutant phenotype /// 0006281 // DNA repair // inferred from mutant phenotype /// 0006289 // nucleotide-excision repair // inferred from mutant phenotype /// 0006289 // nucleot…	0000109 // nucleotide-excision repair complex // not recorded /// 0000784 // nuclear chromosome, telomeric region // not recorded /// 0005634 // nucleus // not recorded /// 0005669 // transcription factor TFIID complex // inferred from direct assay /// 0005737 // cytoplasm // not recorded	0000014 // single-stranded DNA endodeoxyribonuclease activity // not recorded /// 0001094 // TFIID-class transcription factor binding // inferred from direct assay /// 0003677 // DNA binding // inferred from electronic annotation /// 0003684 // damaged DNA binding // not recorded /// 0003697 // single-stranded DNA binding // not recorded /// 0004518 // nuclease activity // inferred from electroni…	---
1417353_x_at	0.0370792	2.19369	10.1962	10.0433	9.4591	P	P	P	8.85683	8.78685	8.75273	P	P	P	1417353_x_at	Snrpa1	small nuclear ribonucleoprotein polypeptide A'	NM_021336 /// XR_391365	68981	ENSMUSG00000030512 /// OTTMUSG00000024902	chr7	66060401	66074587	+	0006397 // mRNA processing // inferred from electronic annotation /// 0008380 // RNA splicing // inferred from electronic annotation	0005634 // nucleus // not recorded /// 0005681 // spliceosomal complex // not recorded /// 0019012 // virion // inferred from electronic annotation /// 0019013 // viral nucleocapsid // inferred from electronic annotation /// 0030529 // ribonucleoprotein complex // inferred from electronic annotation /// 0071013 // catalytic step 2 spliceosome // not recorded	0003723 // RNA binding // inferred from electronic annotation /// 0005515 // protein binding // inferred from electronic annotation /// 0044822 // poly(A) RNA binding // not recorded	mRNA_processing_binding_Reactome // GenMAPP
1417362_at	0.0109557	0.249834	8.38851	8.59225	7.5445	P	P	A	10.0009	10.1232	10.5445	P	P	P	1417362_at	Rhcg	Rhesus blood group-associated C glycoprotein	NM_019799 /// XM_006541004	56315	ENSMUSG00000030549 /// OTTMUSG00000025008	chr7	79593369	79617657	-	0006810 // transport // inferred from electronic annotation /// 0006873 // cellular ion homeostasis // not recorded /// 0006885 // regulation of pH // inferred from mutant phenotype /// 0015695 // organic cation transport // not recorded /// 0015696 // ammonium transport // inferred from direct assay /// 0015696 // ammonium transport // not recorded /// 0070634 // transepithelial ammonium transpo…	0005886 // plasma membrane // inferred from direct assay /// 0005886 // plasma membrane // not recorded /// 0005887 // integral component of plasma membrane // not recorded /// 0016020 // membrane // inferred from electronic annotation /// 0016021 // integral component of membrane // inferred from electronic annotation /// 0016323 // basolateral plasma membrane // not recorded /// 0016324 // apic…	0008519 // ammonium transmembrane transporter activity // inferred from direct assay /// 0008519 // ammonium transmembrane transporter activity // not recorded /// 0030506 // ankyrin binding // not recorded	---
1417374_at	0.00153167	2.20715	13.3286	13.1971	13.5047	P	P	P	12.2891	12.134	12.1932	P	P	P	1417374_at	Tuba4a	tubulin, alpha 4A	NM_009447 /// XM_006496478	22145	ENSMUSG00000026202	chr1	75214222	75219238	-	0006184 // GTP catabolic process // inferred from electronic annotation /// 0007017 // microtubule-based process // inferred from electronic annotation /// 0051258 // protein polymerization // inferred from electronic annotation	0005737 // cytoplasm // inferred from electronic annotation /// 0005856 // cytoskeleton // inferred from electronic annotation /// 0005874 // microtubule // not recorded /// 0015630 // microtubule cytoskeleton // inferred from electronic annotation /// 0043234 // protein complex // inferred from electronic annotation /// 0070062 // extracellular vesicular exosome // not recorded	0000166 // nucleotide binding // inferred from electronic annotation /// 0003924 // GTPase activity // inferred from electronic annotation /// 0005200 // structural constituent of cytoskeleton // inferred from electronic annotation /// 0005515 // protein binding // inferred from electronic annotation /// 0005525 // GTP binding // inferred from electronic annotation	---
1417379_at	0.0033851	2.03582	11.6918	11.4238	11.5355	P	P	P	10.6796	10.2861	10.5923	P	P	P	1417379_at	Iqgap1	IQ motif containing GTPase activating protein 1	NM_016721 /// XM_006540950 /// XM_006540951 /// XR_391347	29875	ENSMUSG00000030536	chr7	80712175	80803295	-	0001817 // regulation of cytokine production // inferred from mutant phenotype /// 0007165 // signal transduction // inferred from electronic annotation /// 0007173 // epidermal growth factor receptor signaling pathway // inferred from mutant phenotype /// 0007264 // small GTPase mediated signal transduction // inferred from electronic annotation /// 0008543 // fibroblast growth factor receptor s…	0005622 // intracellular // inferred from electronic annotation /// 0005634 // nucleus // not recorded /// 0005737 // cytoplasm // inferred from direct assay /// 0005737 // cytoplasm // not recorded /// 0005874 // microtubule // not recorded /// 0005886 // plasma membrane // not recorded /// 0005911 // cell-cell junction // inferred from direct assay /// 0016020 // membrane // inferred from direc…	0005096 // GTPase activator activity // inferred from electronic annotation /// 0005099 // Ras GTPase activator activity // inferred from electronic annotation /// 0005515 // protein binding // inferred from physical interaction /// 0005516 // calmodulin binding // not recorded /// 0005547 // phosphatidylinositol-3,4,5-trisphosphate binding // not recorded /// 0017048 // Rho GTPase binding // inf…	G13_Signaling_Pathway // GenMAPP
1417380_at	0.0115793	2.20281	11.4869	11.4722	11.6343	P	P	P	10.2072	10.2308	10.69	P	P	P	1417380_at	Iqgap1	IQ motif containing GTPase activating protein 1	NM_016721 /// XM_006540950 /// XM_006540951 /// XR_391347	29875	ENSMUSG00000030536	chr7	80712175	80803295	-	0001817 // regulation of cytokine production // inferred from mutant phenotype /// 0007165 // signal transduction // inferred from electronic annotation /// 0007173 // epidermal growth factor receptor signaling pathway // inferred from mutant phenotype /// 0007264 // small GTPase mediated signal transduction // inferred from electronic annotation /// 0008543 // fibroblast growth factor receptor s…	0005622 // intracellular // inferred from electronic annotation /// 0005634 // nucleus // not recorded /// 0005737 // cytoplasm // inferred from direct assay /// 0005737 // cytoplasm // not recorded /// 0005874 // microtubule // not recorded /// 0005886 // plasma membrane // not recorded /// 0005911 // cell-cell junction // inferred from direct assay /// 0016020 // membrane // inferred from direc…	0005096 // GTPase activator activity // inferred from electronic annotation /// 0005099 // Ras GTPase activator activity // inferred from electronic annotation /// 0005515 // protein binding // inferred from physical interaction /// 0005516 // calmodulin binding // not recorded /// 0005547 // phosphatidylinositol-3,4,5-trisphosphate binding // not recorded /// 0017048 // Rho GTPase binding // inf…	G13_Signaling_Pathway // GenMAPP
1417394_at	0.0325052	2.63829	10.3281	9.82153	10.8773	P	P	P	9.25377	8.83768	8.89233	P	P	P	1417394_at	Klf4	Kruppel-like factor 4 (gut)	NM_010637	16600	ENSMUSG00000003032 /// OTTMUSG00000007231	chr4	55527136	55532466	-	0000122 // negative regulation of transcription from RNA polymerase II promoter // not recorded /// 0006351 // transcription, DNA-templated // inferred from electronic annotation /// 0006355 // regulation of transcription, DNA-templated // inferred from electronic annotation /// 0006357 // regulation of transcription from RNA polymerase II promoter // inferred from direct assay /// 0006366 // tra…	0000785 // chromatin // not recorded /// 0000790 // nuclear chromatin // not recorded /// 0005634 // nucleus // inferred from direct assay /// 0005634 // nucleus // not recorded /// 0005634 // nucleus // non-traceable author statement /// 0005667 // transcription factor complex // not recorded	0000987 // core promoter proximal region sequence-specific DNA binding // not recorded /// 0001010 // sequence-specific DNA binding transcription factor recruiting transcription factor activity // inferred from direct assay /// 0001077 // RNA polymerase II core promoter proximal region sequence-specific DNA binding transcription factor activity involved in positive regulation of transcription // …	---
1417395_at	0.0491634	2.40409	9.26231	8.84227	9.94132	P	P	P	8.23517	7.89534	8.30336	P	P	P	1417395_at	Klf4	Kruppel-like factor 4 (gut)	NM_010637	16600	ENSMUSG00000003032 /// OTTMUSG00000007231	chr4	55527136	55532466	-	0000122 // negative regulation of transcription from RNA polymerase II promoter // not recorded /// 0006351 // transcription, DNA-templated // inferred from electronic annotation /// 0006355 // regulation of transcription, DNA-templated // inferred from electronic annotation /// 0006357 // regulation of transcription from RNA polymerase II promoter // inferred from direct assay /// 0006366 // tra…	0000785 // chromatin // not recorded /// 0000790 // nuclear chromatin // not recorded /// 0005634 // nucleus // inferred from direct assay /// 0005634 // nucleus // not recorded /// 0005634 // nucleus // non-traceable author statement /// 0005667 // transcription factor complex // not recorded	0000987 // core promoter proximal region sequence-specific DNA binding // not recorded /// 0001010 // sequence-specific DNA binding transcription factor recruiting transcription factor activity // inferred from direct assay /// 0001077 // RNA polymerase II core promoter proximal region sequence-specific DNA binding transcription factor activity involved in positive regulation of transcription // …	---
1417398_at	0.0113368	6.3264	12.9526	12.7364	11.8674	P	P	P	9.89414	10.0931	9.77892	P	P	P	1417398_at	Rras2	related RAS viral (r-ras) oncogene homolog 2	NM_025846 /// XM_006508119	66922	ENSMUSG00000055723	chr7	114046782	114117766	-	0001649 // osteoblast differentiation // not recorded /// 0006184 // GTP catabolic process // inferred from electronic annotation /// 0006886 // intracellular protein transport // inferred from electronic annotation /// 0006913 // nucleocytoplasmic transport // inferred from electronic annotation /// 0007165 // signal transduction // inferred from electronic annotation /// 0007264 // small GTPase…	0005622 // intracellular // inferred from direct assay /// 0005886 // plasma membrane // inferred from electronic annotation /// 0016020 // membrane // not recorded /// 0070062 // extracellular vesicular exosome // not recorded	0000166 // nucleotide binding // inferred from electronic annotation /// 0003924 // GTPase activity // inferred from electronic annotation /// 0005515 // protein binding // inferred from physical interaction /// 0005525 // GTP binding // inferred from electronic annotation	---
1417408_at	0.0158563	4.6382	12.1322	10.9987	11.2906	P	P	P	9.29562	9.55683	9.14841	P	P	P	1417408_at	F3	coagulation factor III	NM_010171	14066	ENSMUSG00000028128	chr3	121723540	121735052	+	0001938 // positive regulation of endothelial cell proliferation // not recorded /// 0002541 // activation of plasma proteins involved in acute inflammatory response // not recorded /// 0006919 // activation of cysteine-type endopeptidase activity involved in apoptotic process // not recorded /// 0007596 // blood coagulation // traceable author statement /// 0007599 // hemostasis // inferred from…	0005615 // extracellular space // not recorded /// 0005737 // cytoplasm // not recorded /// 0009986 // cell surface // not recorded /// 0016020 // membrane // inferred from electronic annotation /// 0016021 // integral component of membrane // inferred from electronic annotation /// 0031012 // extracellular matrix // not recorded	0002020 // protease binding // not recorded /// 0005515 // protein binding // inferred from electronic annotation /// 0005543 // phospholipid binding // not recorded	---
1417409_at	0.0212853	5.89689	11.2837	10.4401	12.003	P	P	P	8.46704	8.868	9.05885	P	P	P	1417409_at	Jun	jun proto-oncogene	NM_010591	16476	ENSMUSG00000052684 /// OTTMUSG00000008035	chr4	95049033	95052208	-	0001525 // angiogenesis // inferred from mutant phenotype /// 0001525 // angiogenesis // not recorded /// 0001774 // microglial cell activation // inferred from mutant phenotype /// 0001836 // release of cytochrome c from mitochondria // not recorded /// 0001889 // liver development // inferred from mutant phenotype /// 0001938 // positive regulation of endothelial cell proliferation // inferred …	0000790 // nuclear chromatin // not recorded /// 0005634 // nucleus // inferred from direct assay /// 0005634 // nucleus // not recorded /// 0005667 // transcription factor complex // inferred from direct assay /// 0005667 // transcription factor complex // inferred from physical interaction /// 0005719 // nuclear euchromatin // not recorded /// 0005829 // cytosol // not recorded /// 0017053 // t…	0000980 // RNA polymerase II distal enhancer sequence-specific DNA binding // not recorded /// 0001077 // RNA polymerase II core promoter proximal region sequence-specific DNA binding transcription factor activity involved in positive regulation of transcription // not recorded /// 0001102 // RNA polymerase II activating transcription factor binding // not recorded /// 0003677 // DNA binding // i…	Apoptosis // GenMAPP /// Apoptosis_GenMAPP // GenMAPP /// MAPK_Cascade // GenMAPP /// Smooth_muscle_contraction // GenMAPP /// TGF_Beta_Signaling_Pathway // GenMAPP /// Wnt_Signaling // GenMAPP
1417432_a_at	0.00649479	2.56496	12.4206	12.2873	11.9426	P	P	P	10.9507	10.8691	10.7907	P	P	P	1417432_a_at	Gnb1	guanine nucleotide binding protein (G protein), beta 1	NM_001160016 /// NM_001160017 /// NM_008142	14688	ENSMUSG00000029064 /// OTTMUSG00000010708	chr4	155491371	155557816	+	0006184 // GTP catabolic process // not recorded /// 0007165 // signal transduction // inferred from electronic annotation /// 0007186 // G-protein coupled receptor signaling pathway // inferred from direct assay /// 0007186 // G-protein coupled receptor signaling pathway // not recorded /// 0007186 // G-protein coupled receptor signaling pathway // traceable author statement /// 0007200 // phosp…	0001750 // photoreceptor outer segment // inferred from direct assay /// 0001917 // photoreceptor inner segment // not recorded /// 0005765 // lysosomal membrane // not recorded /// 0005834 // heterotrimeric G-protein complex // inferred from physical interaction /// 0005834 // heterotrimeric G-protein complex // not recorded /// 0005886 // plasma membrane // traceable author statement /// 003042…	0001664 // G-protein coupled receptor binding // not recorded /// 0003924 // GTPase activity // not recorded /// 0004871 // signal transducer activity // inferred from electronic annotation /// 0005515 // protein binding // inferred from electronic annotation /// 0030507 // spectrin binding // not recorded /// 0031702 // type 1 angiotensin receptor binding // not recorded /// 0032403 // protein c…	Calcium_regulation_in_cardiac_cells // GenMAPP /// G_Protein_Signaling // GenMAPP /// Smooth_muscle_contraction // GenMAPP
1417446_at	0.0255329	2.16075	9.48222	9.46135	8.77637	P	P	P	7.85059	7.97266	8.56289	P	P	P	1417446_at	Slc12a4	solute carrier family 12, member 4	NM_001253804 /// NM_009195 /// NR_045594 /// XM_006530792	20498	ENSMUSG00000017765 /// OTTMUSG00000031019	chr8	105943591	105966106	-	0006810 // transport // inferred from electronic annotation /// 0006811 // ion transport // inferred from electronic annotation /// 0006813 // potassium ion transport // inferred from electronic annotation /// 0006821 // chloride transport // inferred from electronic annotation /// 0055085 // transmembrane transport // inferred from electronic annotation /// 1902476 // chloride transmembrane tran…	0005765 // lysosomal membrane // not recorded /// 0016020 // membrane // inferred from electronic annotation /// 0016021 // integral component of membrane // inferred from electronic annotation	0005215 // transporter activity // inferred from electronic annotation /// 0015293 // symporter activity // inferred from electronic annotation /// 0015377 // cation:chloride symporter activity // inferred from electronic annotation /// 0015379 // potassium:chloride symporter activity // inferred from electronic annotation	---
1417447_at	0.0185082	0.327442	8.05528	8.32331	7.23545	P	P	P	9.68239	9.10936	9.7761	P	P	P	1417447_at	Tcf21	transcription factor 21	NM_011545	21412	ENSMUSG00000045680	chr10	22817278	22820143	-	0000122 // negative regulation of transcription from RNA polymerase II promoter // inferred from direct assay /// 0000122 // negative regulation of transcription from RNA polymerase II promoter // not recorded /// 0001657 // ureteric bud development // inferred from mutant phenotype /// 0001658 // branching involved in ureteric bud morphogenesis // inferred from mutant phenotype /// 0001763 // mo…	0005634 // nucleus // inferred by curator /// 0005634 // nucleus // not recorded	0001077 // RNA polymerase II core promoter proximal region sequence-specific DNA binding transcription factor activity involved in positive regulation of transcription // inferred from direct assay /// 0001078 // RNA polymerase II core promoter proximal region sequence-specific DNA binding transcription factor activity involved in negative regulation of transcription // inferred from direct assay…	---
1417462_at	0.0227939	3.83651	8.67949	7.94288	7.30463	P	P	P	5.64339	6.18106	6.48658	P	P	P	1417462_at	Cap1	CAP, adenylate cyclase-associated protein 1 (yeast)	NM_007598 /// XM_006502695 /// XM_006502696 /// XM_006502697	12331	ENSMUSG00000028656 /// OTTMUSG00000008872	chr4	122858940	122886045	-	0000902 // cell morphogenesis // inferred from genetic interaction /// 0001667 // ameboidal cell migration // inferred from mutant phenotype /// 0006898 // receptor-mediated endocytosis // inferred from mutant phenotype /// 0007010 // cytoskeleton organization // inferred from electronic annotation /// 0030036 // actin cytoskeleton organization // inferred from mutant phenotype	0005576 // extracellular region // traceable author statement /// 0005737 // cytoplasm // inferred from direct assay /// 0005829 // cytosol // traceable author statement /// 0005886 // plasma membrane // inferred from electronic annotation /// 0016020 // membrane // inferred from electronic annotation /// 0030864 // cortical actin cytoskeleton // inferred from direct assay /// 0070062 // extracel…	0003779 // actin binding // inferred from electronic annotation /// 0005515 // protein binding // inferred from physical interaction	---
1417483_at	0.0381049	4.86157	11.6398	11.3953	12.8095	P	P	P	9.77281	9.8847	9.75969	P	P	P	1417483_at	Nfkbiz	nuclear factor of kappa light polypeptide gene enhancer in B cells inhibitor, zeta	NM_001159394 /// NM_001159395 /// NM_030612	80859	ENSMUSG00000035356 /// OTTMUSG00000019996	chr16	55811374	55838899	-	0006351 // transcription, DNA-templated // inferred from electronic annotation /// 0006355 // regulation of transcription, DNA-templated // inferred from electronic annotation /// 0006954 // inflammatory response // inferred from direct assay	0005634 // nucleus // inferred from direct assay	0005515 // protein binding // inferred from electronic annotation	---
1417487_at	0.00399083	35.3639	11.3137	10.0544	11.8255	P	P	P	5.62976	6.48988	6.02869	A	A	A	1417487_at	Fosl1	fos-like antigen 1	NM_010235	14283	ENSMUSG00000024912	chr19	5447697	5455947	+	0001701 // in utero embryonic development // inferred from mutant phenotype /// 0006355 // regulation of transcription, DNA-templated // inferred from electronic annotation /// 0007296 // vitellogenesis // inferred from mutant phenotype /// 0007565 // female pregnancy // inferred from electronic annotation /// 0007612 // learning // inferred from electronic annotation /// 0008285 // negative regu…	0005634 // nucleus // not recorded /// 0005829 // cytosol // not recorded /// 0042734 // presynaptic membrane // not recorded /// 0043005 // neuron projection // not recorded /// 0043231 // intracellular membrane-bounded organelle // not recorded	0000977 // RNA polymerase II regulatory region sequence-specific DNA binding // inferred from direct assay /// 0003677 // DNA binding // not recorded /// 0003700 // sequence-specific DNA binding transcription factor activity // inferred from electronic annotation /// 0005515 // protein binding // inferred from electronic annotation /// 0043565 // sequence-specific DNA binding // inferred from ele…	Wnt_Signaling // GenMAPP
1417488_at	0.00943988	17.7387	6.89489	6.14046	6.64936	P	P	P	2.26029	3.20622	1.21693	A	A	A	1417488_at	Fosl1	fos-like antigen 1	NM_010235	14283	ENSMUSG00000024912	chr19	5447697	5455947	+	0001701 // in utero embryonic development // inferred from mutant phenotype /// 0006355 // regulation of transcription, DNA-templated // inferred from electronic annotation /// 0007296 // vitellogenesis // inferred from mutant phenotype /// 0007565 // female pregnancy // inferred from electronic annotation /// 0007612 // learning // inferred from electronic annotation /// 0008285 // negative regu…	0005634 // nucleus // not recorded /// 0005829 // cytosol // not recorded /// 0042734 // presynaptic membrane // not recorded /// 0043005 // neuron projection // not recorded /// 0043231 // intracellular membrane-bounded organelle // not recorded	0000977 // RNA polymerase II regulatory region sequence-specific DNA binding // inferred from direct assay /// 0003677 // DNA binding // not recorded /// 0003700 // sequence-specific DNA binding transcription factor activity // inferred from electronic annotation /// 0005515 // protein binding // inferred from electronic annotation /// 0043565 // sequence-specific DNA binding // inferred from ele…	Wnt_Signaling // GenMAPP
1417491_at	0.014318	2.24505	9.5294	10.1069	10.2094	P	P	P	8.6648	8.58094	9.12656	P	P	P	1417491_at	Ctsb	cathepsin B	NM_007798	13030	ENSMUSG00000021939	chr14	63122482	63145921	+	0006508 // proteolysis // not recorded /// 0030574 // collagen catabolic process // not recorded /// 0046697 // decidualization // inferred from genetic interaction /// 0050790 // regulation of catalytic activity // inferred from electronic annotation /// 0051603 // proteolysis involved in cellular protein catabolic process // not recorded /// 0060548 // negative regulation of cell death // not r…	0005576 // extracellular region // not recorded /// 0005615 // extracellular space // not recorded /// 0005730 // nucleolus // not recorded /// 0005737 // cytoplasm // not recorded /// 0005739 // mitochondrion // inferred from direct assay /// 0005739 // mitochondrion // not recorded /// 0005764 // lysosome // inferred from direct assay /// 0005764 // lysosome // not recorded /// 0005901 // caveo…	0004175 // endopeptidase activity // not recorded /// 0004197 // cysteine-type endopeptidase activity // not recorded /// 0005515 // protein binding // inferred from electronic annotation /// 0005518 // collagen binding // not recorded /// 0008233 // peptidase activity // not recorded /// 0008234 // cysteine-type peptidase activity // not recorded /// 0016787 // hydrolase activity // inferred fro…	---
1417500_a_at	0.00961014	2.28447	12.6024	12.5384	12.1856	P	P	P	10.8487	11.422	11.4395	P	P	P	1417500_a_at	Tgm2	transglutaminase 2, C polypeptide	NM_009373	21817	ENSMUSG00000037820 /// OTTMUSG00000015888	chr2	158116402	158146398	-	0001974 // blood vessel remodeling // not recorded /// 0007186 // G-protein coupled receptor signaling pathway // traceable author statement /// 0007200 // phospholipase C-activating G-protein coupled receptor signaling pathway // not recorded /// 0018149 // peptide cross-linking // traceable author statement /// 0018153 // isopeptide cross-linking via N6-(L-isoglutamyl)-L-lysine // not recorded …	0005578 // proteinaceous extracellular matrix // traceable author statement /// 0005737 // cytoplasm // not recorded /// 0005739 // mitochondrion // not recorded /// 0005829 // cytosol // traceable author statement /// 0005886 // plasma membrane // not recorded /// 0016020 // membrane // traceable author statement /// 0070062 // extracellular vesicular exosome // not recorded	0003810 // protein-glutamine gamma-glutamyltransferase activity // inferred from mutant phenotype /// 0005509 // calcium ion binding // non-traceable author statement /// 0005515 // protein binding // inferred from electronic annotation /// 0005525 // GTP binding // not recorded /// 0005525 // GTP binding // non-traceable author statement /// 0008483 // transaminase activity // not recorded /// 0…	---
1417504_at	0.035056	0.419721	12.1895	12.6709	13.297	P	P	P	14.4058	13.8951	13.7423	P	P	P	1417504_at	Calb1	calbindin 1	NM_009788	12307	ENSMUSG00000028222 /// OTTMUSG00000004637	chr4	15881258	15907063	+	0007611 // learning or memory // inferred from electronic annotation /// 0007614 // short-term memory // not recorded /// 0007616 // long-term memory // not recorded /// 0007626 // locomotory behavior // inferred from mutant phenotype /// 0010842 // retina layer formation // inferred from expression pattern /// 0035502 // metanephric part of ureteric bud development // inferred from expression pa…	0005622 // intracellular // inferred from direct assay /// 0005634 // nucleus // inferred from direct assay /// 0005634 // nucleus // not recorded /// 0005737 // cytoplasm // inferred from direct assay /// 0005737 // cytoplasm // not recorded /// 0005829 // cytosol // inferred from direct assay /// 0030424 // axon // inferred from direct assay /// 0030424 // axon // not recorded /// 0030425 // de…	0005499 // vitamin D binding // inferred from electronic annotation /// 0005509 // calcium ion binding // not recorded /// 0005515 // protein binding // inferred from electronic annotation /// 0008270 // zinc ion binding // not recorded /// 0046872 // metal ion binding // inferred from electronic annotation	---
1417562_at	0.0180086	4.1334	12.1804	11.7866	11.1438	P	P	P	9.85181	9.61909	9.67003	P	P	P	1417562_at	Eif4ebp1	eukaryotic translation initiation factor 4E binding protein 1	NM_007918	13685	ENSMUSG00000031490	chr8	27260352	27276668	+	0000082 // G1/S transition of mitotic cell cycle // not recorded /// 0002931 // response to ischemia // inferred from electronic annotation /// 0006417 // regulation of translation // inferred from electronic annotation /// 0006446 // regulation of translational initiation // traceable author statement /// 0008286 // insulin receptor signaling pathway // inferred from direct assay /// 0017148 // …	0005634 // nucleus // not recorded /// 0005737 // cytoplasm // inferred by curator /// 0005737 // cytoplasm // not recorded /// 0043234 // protein complex // not recorded	0005515 // protein binding // inferred from physical interaction /// 0008190 // eukaryotic initiation factor 4E binding // inferred from physical interaction /// 0008190 // eukaryotic initiation factor 4E binding // not recorded /// 0030371 // translation repressor activity // not recorded /// 0030371 // translation repressor activity // traceable author statement /// 0031369 // translation initi…	Translation_Factors // GenMAPP
1417574_at	0.00192501	0.158751	8.67551	7.99421	8.90191	P	P	P	11.3079	10.7398	11.5263	P	P	P	1417574_at	Cxcl12	chemokine (C-X-C motif) ligand 12	NM_001012477 /// NM_013655 /// NM_021704	20315	ENSMUSG00000061353 /// OTTMUSG00000022768	chr6	117168577	117181367	+	0001569 // patterning of blood vessels // inferred from mutant phenotype /// 0001666 // response to hypoxia // inferred from electronic annotation /// 0001667 // ameboidal cell migration // inferred from mutant phenotype /// 0001764 // neuron migration // not recorded /// 0001938 // positive regulation of endothelial cell proliferation // not recorded /// 0006935 // chemotaxis // inferred from el…	0005576 // extracellular region // inferred from electronic annotation /// 0005615 // extracellular space // not recorded /// 0005886 // plasma membrane // not recorded /// 0009897 // external side of plasma membrane // inferred from direct assay	0005125 // cytokine activity // inferred from electronic annotation /// 0008009 // chemokine activity // inferred from direct assay /// 0008083 // growth factor activity // inferred from electronic annotation /// 0042379 // chemokine receptor binding // not recorded /// 0045236 // CXCR chemokine receptor binding // not recorded	---
1417600_at	0.00158489	0.255196	9.17923	8.78248	9.40889	P	P	P	11.1777	10.8725	11.2701	P	P	P	1417600_at	Slc15a2	solute carrier family 15 (H+/peptide transporter), member 2	NM_001145899 /// NM_021301 /// XM_006522428 /// XM_006522429 /// XM_006522430 /// XR_384581	57738	ENSMUSG00000022899 /// OTTMUSG00000035783	chr16	36750163	36784962	-	0006810 // transport // inferred from electronic annotation /// 0006857 // oligopeptide transport // inferred from direct assay /// 0042891 // antibiotic transport // not recorded /// 0042938 // dipeptide transport // not recorded	0005887 // integral component of plasma membrane // inferred from direct assay /// 0016020 // membrane // inferred from direct assay /// 0016021 // integral component of membrane // inferred from electronic annotation /// 0070062 // extracellular vesicular exosome // not recorded	0005215 // transporter activity // inferred from electronic annotation /// 0005515 // protein binding // inferred from electronic annotation /// 0015198 // oligopeptide transporter activity // inferred from electronic annotation /// 0015334 // high affinity oligopeptide transporter activity // inferred from direct assay /// 0042895 // antibiotic transporter activity // not recorded /// 0042936 //…	---
1417601_at	0.0123035	7.81351	6.69258	6.23023	7.19813	P	P	P	4.04946	2.62117	4.24254	P	A	A	1417601_at	Rgs1	regulator of G-protein signaling 1	NM_015811	50778	ENSMUSG00000026358 /// OTTMUSG00000035154	chr1	144244669	144249068	-	0007186 // G-protein coupled receptor signaling pathway // traceable author statement /// 0009968 // negative regulation of signal transduction // inferred from electronic annotation /// 0038032 // termination of G-protein coupled receptor signaling pathway // inferred from electronic annotation /// 0043547 // positive regulation of GTPase activity // not recorded	0005737 // cytoplasm // not recorded /// 0005886 // plasma membrane // not recorded /// 0005886 // plasma membrane // traceable author statement	0005096 // GTPase activator activity // not recorded /// 0005096 // GTPase activator activity // traceable author statement	Calcium_regulation_in_cardiac_cells // GenMAPP /// Smooth_muscle_contraction // GenMAPP
1417602_at	0.00134787	0.421903	9.62823	9.51314	9.717	P	P	P	10.6567	10.9728	10.9501	P	P	P	1417602_at	Per2	period circadian clock 2	NM_011066 /// XM_006529249 /// XM_006529250	18627	ENSMUSG00000055866	chr1	91415981	91459324	-	0000122 // negative regulation of transcription from RNA polymerase II promoter // inferred from direct assay /// 0000122 // negative regulation of transcription from RNA polymerase II promoter // not recorded /// 0002931 // response to ischemia // inferred from mutant phenotype /// 0005978 // glycogen biosynthetic process // inferred from mutant phenotype /// 0006094 // gluconeogenesis // inferr…	0005634 // nucleus // inferred from direct assay /// 0005634 // nucleus // inferred from physical interaction /// 0005634 // nucleus // not recorded /// 0005654 // nucleoplasm // traceable author statement /// 0005737 // cytoplasm // inferred from direct assay /// 0005737 // cytoplasm // not recorded /// 0005829 // cytosol // traceable author statement /// 0048471 // perinuclear region of cytopla…	0000976 // transcription regulatory region sequence-specific DNA binding // inferred from direct assay /// 0000988 // protein binding transcription factor activity // inferred from electronic annotation /// 0000989 // transcription factor binding transcription factor activity // not recorded /// 0001047 // core promoter binding // inferred from direct assay /// 0001222 // transcription corepresso…	Circadian_Exercise // GenMAPP
1417612_at	0.020809	2.90964	10.811	9.79928	10.2953	P	P	P	9.23657	8.21586	8.82963	P	P	P	1417612_at	Ier5	immediate early response 5	NM_010500	15939	ENSMUSG00000056708	chr1	155097014	155099633	-	---	---	---	---
1417635_at	0.0206235	0.337645	7.40716	7.59278	8.33412	P	P	P	9.50199	9.20868	9.47871	P	P	P	1417635_at	Spa17	sperm autoantigenic protein 17	NM_011449 /// XM_006510123	20686	ENSMUSG00000001948	chr9	37603293	37613614	-	0001539 // cilium or flagellum-dependent cell motility // inferred from electronic annotation /// 0007165 // signal transduction // inferred from electronic annotation /// 0007339 // binding of sperm to zona pellucida // traceable author statement	0005737 // cytoplasm // not recorded /// 0016020 // membrane // inferred from electronic annotation /// 0031514 // motile cilium // not recorded /// 0072372 // primary cilium // not recorded	0005515 // protein binding // inferred from electronic annotation /// 0008603 // cAMP-dependent protein kinase regulator activity // inferred from electronic annotation	---
1417667_a_at	0.0353005	0.455623	12.0991	12.7659	12.861	P	P	P	13.7818	13.8026	13.6519	P	P	P	1417667_a_at	Pter	phosphotriesterase related	NM_008961 /// XM_006497400 /// XM_006497401 /// XM_006497402 /// XM_006497403	19212	ENSMUSG00000026730 /// OTTMUSG00000011123	chr2	12924040	13001859	+	0009056 // catabolic process // inferred from electronic annotation	0070062 // extracellular vesicular exosome // not recorded	0004518 // nuclease activity // inferred from electronic annotation /// 0008270 // zinc ion binding // inferred from electronic annotation /// 0016787 // hydrolase activity // inferred from electronic annotation /// 0016788 // hydrolase activity, acting on ester bonds // inferred from electronic annotation /// 0016888 // endodeoxyribonuclease activity, producing 5'-phosphomonoesters // inferred f…	---
1417688_at	0.00395158	0.355437	8.73458	8.47735	8.0945	P	P	P	10.1906	9.87157	9.75612	P	P	P	1417688_at	Fam20c	family with sequence similarity 20, member C	NM_030565 /// XM_006504775	80752	ENSMUSG00000025854 /// OTTMUSG00000030351	chr5	138754651	138810063	+	0001501 // skeletal system development // inferred from mutant phenotype /// 0006468 // protein phosphorylation // not recorded /// 0016310 // phosphorylation // inferred from electronic annotation /// 0030501 // positive regulation of bone mineralization // inferred from direct assay /// 0031214 // biomineral tissue development // inferred from electronic annotation /// 0036179 // osteoclast mat…	0005576 // extracellular region // inferred from electronic annotation /// 0005615 // extracellular space // inferred from direct assay /// 0005615 // extracellular space // not recorded /// 0005794 // Golgi apparatus // not recorded /// 0070062 // extracellular vesicular exosome // not recorded	0004674 // protein serine/threonine kinase activity // not recorded /// 0005509 // calcium ion binding // inferred from direct assay /// 0016301 // kinase activity // inferred from electronic annotation /// 0016740 // transferase activity // inferred from electronic annotation /// 0046872 // metal ion binding // inferred from electronic annotation	---
1417719_at	0.000982279	0.394449	10.886	11.2287	11.1346	P	P	P	12.4499	12.6058	12.2146	P	P	P	1417719_at	Sap30	sin3 associated polypeptide	NM_021788	60406	ENSMUSG00000031609 /// OTTMUSG00000029898	chr8	57482703	57487917	-	0000122 // negative regulation of transcription from RNA polymerase II promoter // inferred from direct assay /// 0006351 // transcription, DNA-templated // inferred from electronic annotation /// 0006355 // regulation of transcription, DNA-templated // not recorded /// 0035914 // skeletal muscle cell differentiation // inferred from mutant phenotype	0000118 // histone deacetylase complex // not recorded /// 0005634 // nucleus // inferred from direct assay /// 0016580 // Sin3 complex // not recorded	0003677 // DNA binding // inferred from electronic annotation /// 0003714 // transcription corepressor activity // not recorded /// 0005515 // protein binding // inferred from physical interaction /// 0046872 // metal ion binding // inferred from electronic annotation	---
1417741_at	0.00682291	0.417394	8.85363	8.35167	8.25029	P	P	P	10.0423	9.57573	9.6491	P	P	P	1417741_at	Pygl	liver glycogen phosphorylase	NM_133198	110095	ENSMUSG00000021069 /// OTTMUSG00000025904	chr12	70190575	70227640	-	0005975 // carbohydrate metabolic process // inferred from electronic annotation /// 0005977 // glycogen metabolic process // inferred from direct assay /// 0005977 // glycogen metabolic process // not recorded /// 0005980 // glycogen catabolic process // not recorded /// 0006015 // 5-phosphoribose 1-diphosphate biosynthetic process // not recorded /// 0008152 // metabolic process // inferred fro…	0005737 // cytoplasm // not recorded /// 0005886 // plasma membrane // not recorded	0000166 // nucleotide binding // inferred from electronic annotation /// 0002060 // purine nucleobase binding // not recorded /// 0003824 // catalytic activity // inferred from electronic annotation /// 0004645 // phosphorylase activity // inferred from electronic annotation /// 0005515 // protein binding // inferred from physical interaction /// 0005524 // ATP binding // not recorded /// 0008144…	Glycogen_Metabolism // GenMAPP
1417744_a_at	0.00220318	2.26034	10.8732	11.0825	10.6559	P	P	P	9.52333	9.75757	9.81629	P	P	P	1417744_a_at	Ralb	v-ral simian leukemia viral oncogene homolog B (ras related)	NM_022327 /// XM_006529782	64143	ENSMUSG00000004451 /// OTTMUSG00000021776	chr1	119470304	119483659	-	0000910 // cytokinesis // not recorded /// 0001928 // regulation of exocyst assembly // not recorded /// 0006184 // GTP catabolic process // not recorded /// 0006886 // intracellular protein transport // inferred from electronic annotation /// 0006913 // nucleocytoplasmic transport // inferred from electronic annotation /// 0006915 // apoptotic process // inferred from electronic annotation /// 0…	0005622 // intracellular // inferred from electronic annotation /// 0005886 // plasma membrane // not recorded /// 0016020 // membrane // inferred from electronic annotation /// 0030496 // midbody // not recorded	0000166 // nucleotide binding // inferred from electronic annotation /// 0003924 // GTPase activity // not recorded /// 0005515 // protein binding // inferred from electronic annotation /// 0005525 // GTP binding // not recorded	---
1417752_at	0.00420652	4.44809	8.18034	8.02525	7.76313	P	P	P	5.47849	6.27678	5.65828	A	M	A	1417752_at	Coro1c	coronin, actin binding protein 1C	NM_011779	23790	ENSMUSG00000004530 /// OTTMUSG00000036099	chr5	113842436	113908758	-	0000147 // actin cortical patch assembly // traceable author statement /// 0006909 // phagocytosis // traceable author statement /// 0030036 // actin cytoskeleton organization // not recorded /// 0030036 // actin cytoskeleton organization // traceable author statement	0005737 // cytoplasm // inferred from electronic annotation /// 0005856 // cytoskeleton // traceable author statement /// 0005886 // plasma membrane // inferred from electronic annotation /// 0015629 // actin cytoskeleton // not recorded /// 0016020 // membrane // inferred from electronic annotation /// 0030027 // lamellipodium // inferred from electronic annotation /// 0042995 // cell projection…	0003779 // actin binding // inferred from electronic annotation /// 0005515 // protein binding // inferred from electronic annotation /// 0051015 // actin filament binding // not recorded	---
1417764_at	0.01236	2.01495	10.2211	10.0505	9.71678	P	P	P	8.7306	8.88332	9.32037	P	P	P	1417764_at	Ssr1	signal sequence receptor, alpha	NM_025965 /// XM_006516523 /// XM_006516524	107513	ENSMUSG00000021427	chr13	37977221	37994208	-	---	0005783 // endoplasmic reticulum // inferred from direct assay /// 0005783 // endoplasmic reticulum // not recorded /// 0005789 // endoplasmic reticulum membrane // inferred from electronic annotation /// 0016020 // membrane // inferred from electronic annotation /// 0016021 // integral component of membrane // inferred from electronic annotation	0005515 // protein binding // inferred from electronic annotation	---
1417779_at	0.000682221	0.474761	8.5702	8.31541	8.44965	P	P	P	9.60732	9.50303	9.45616	P	P	P	1417779_at	Ntpcr	nucleoside-triphosphatase, cancer-related	NM_025636 /// XM_006531283 /// XM_006531284 /// XM_006531285 /// XM_006531286 /// XM_006531287	66566	ENSMUSG00000031851 /// OTTMUSG00000032845	chr8	125734202	125748235	+	0008152 // metabolic process // inferred from electronic annotation /// 0016311 // dephosphorylation // inferred from electronic annotation	---	0000166 // nucleotide binding // inferred from electronic annotation /// 0005524 // ATP binding // inferred from electronic annotation /// 0016740 // transferase activity // inferred from electronic annotation /// 0016787 // hydrolase activity // inferred from electronic annotation /// 0017111 // nucleoside-triphosphatase activity // inferred from electronic annotation /// 0044822 // poly(A) RNA …	---
1417803_at	0.0281446	0.0303328	4.34488	4.62746	4.05496	P	A	A	10.2309	7.36286	9.38029	P	P	P	1417803_at	Sptssb	serine palmitoyltransferase, small subunit B	NM_001164210 /// NM_001286959 /// NM_133675	66183	ENSMUSG00000043461	chr3	69819538	69859940	-	0006629 // lipid metabolic process // inferred from electronic annotation /// 0006665 // sphingolipid metabolic process // inferred from electronic annotation	0005783 // endoplasmic reticulum // inferred from electronic annotation /// 0005789 // endoplasmic reticulum membrane // inferred from electronic annotation /// 0016020 // membrane // inferred from electronic annotation /// 0016021 // integral component of membrane // inferred from electronic annotation /// 0017059 // serine C-palmitoyltransferase complex // not recorded	0004758 // serine C-palmitoyltransferase activity // not recorded /// 0005515 // protein binding // inferred from electronic annotation	---
1417817_a_at	0.0064417	4.12271	10.992	11.0555	11.6596	P	P	P	9.14379	9.16068	9.3597	P	P	P	1417817_a_at	Wwtr1	WW domain containing transcription regulator 1	NM_001168281 /// NM_133784	97064	ENSMUSG00000027803 /// OTTMUSG00000029047	chr3	57455644	57575853	-	0000122 // negative regulation of transcription from RNA polymerase II promoter // inferred from genetic interaction /// 0001649 // osteoblast differentiation // inferred from genetic interaction /// 0001649 // osteoblast differentiation // inferred from mutant phenotype /// 0001933 // negative regulation of protein phosphorylation // not recorded /// 0006351 // transcription, DNA-templated // in…	0005634 // nucleus // inferred from direct assay /// 0005634 // nucleus // not recorded /// 0005634 // nucleus // inferred from sequence or structural similarity /// 0005654 // nucleoplasm // traceable author statement /// 0005667 // transcription factor complex // inferred from direct assay /// 0005737 // cytoplasm // inferred from direct assay /// 0005737 // cytoplasm // not recorded	0003713 // transcription coactivator activity // inferred from direct assay /// 0003713 // transcription coactivator activity // not recorded /// 0003714 // transcription corepressor activity // inferred from genetic interaction /// 0005515 // protein binding // inferred from physical interaction /// 0042803 // protein homodimerization activity // inferred from direct assay	---
1417848_at	0.0249725	0.447912	8.95003	9.4674	8.72199	P	P	P	10.2091	10.361	10.1402	P	P	P	1417848_at	Zfp704	zinc finger protein 704	NM_133218 /// XM_006530055	170753	ENSMUSG00000040209	chr3	9427011	9610109	-	---	---	0046872 // metal ion binding // inferred from electronic annotation	---
1417856_at	0.0112302	3.44076	8.31435	7.92219	8.34781	P	P	P	5.82	6.55215	6.74635	A	P	A	1417856_at	Relb	avian reticuloendotheliosis viral (v-rel) oncogene related B	NM_001290457 /// NM_009046 /// XM_006539674 /// XM_006539675	19698	ENSMUSG00000002983 /// OTTMUSG00000020490	chr7	19606221	19629438	-	0006351 // transcription, DNA-templated // inferred from electronic annotation /// 0006355 // regulation of transcription, DNA-templated // inferred from electronic annotation /// 0010628 // positive regulation of gene expression // inferred from mutant phenotype /// 0019882 // antigen processing and presentation // inferred from mutant phenotype /// 0032922 // circadian regulation of gene expres…	0005634 // nucleus // inferred from direct assay /// 0005634 // nucleus // not recorded /// 0005737 // cytoplasm // not recorded /// 0005815 // microtubule organizing center // inferred from electronic annotation /// 0005829 // cytosol // inferred from direct assay /// 0005856 // cytoskeleton // inferred from electronic annotation	0001047 // core promoter binding // inferred from direct assay /// 0003677 // DNA binding // inferred from direct assay /// 0003677 // DNA binding // not recorded /// 0003700 // sequence-specific DNA binding transcription factor activity // inferred from electronic annotation /// 0005515 // protein binding // inferred from physical interaction	---
1417857_at	0.0303728	0.4212	8.50969	8.39126	7.76679	P	P	P	9.53229	9.48105	9.50072	P	P	P	1417857_at	Mmaa	methylmalonic aciduria (cobalamin deficiency) type A	NM_133823 /// XM_006530562 /// XM_006530563 /// XM_006530564 /// XM_006530565 /// XM_006530566 /// XM_006530567	109136	ENSMUSG00000037022	chr8	79267906	79294676	-	0009236 // cobalamin biosynthetic process // inferred from electronic annotation	0005739 // mitochondrion // inferred from electronic annotation	0000166 // nucleotide binding // inferred from electronic annotation /// 0005525 // GTP binding // inferred from electronic annotation /// 0016787 // hydrolase activity // inferred from electronic annotation /// 0017111 // nucleoside-triphosphatase activity // inferred from electronic annotation	---
1417865_at	0.00248927	2.2649	11.8239	11.8313	11.7461	P	P	P	10.6232	10.4683	10.7584	P	P	P	1417865_at	Tnfaip1	tumor necrosis factor, alpha-induced protein 1 (endothelial)	NM_001159392 /// NM_009395 /// XM_006533152	21927	ENSMUSG00000017615 /// OTTMUSG00000000144	chr11	78522868	78536186	-	0006260 // DNA replication // not recorded /// 0006955 // immune response // inferred from sequence or structural similarity /// 0006955 // immune response // inferred from electronic annotation /// 0009790 // embryo development // inferred from expression pattern /// 0016477 // cell migration // not recorded /// 0016567 // protein ubiquitination // not recorded /// 0035024 // negative regulation…	0005634 // nucleus // inferred from electronic annotation /// 0005730 // nucleolus // not recorded /// 0005737 // cytoplasm // not recorded /// 0005768 // endosome // not recorded /// 0031463 // Cul3-RING ubiquitin ligase complex // not recorded	0004842 // ubiquitin-protein transferase activity // not recorded /// 0005515 // protein binding // inferred from electronic annotation /// 0017049 // GTP-Rho binding // not recorded /// 0019904 // protein domain specific binding // not recorded	---
1417866_at	0.00171992	2.46977	11.2066	11.0447	10.8117	P	P	P	9.6366	9.85212	9.67897	P	P	P	1417866_at	Tnfaip1	tumor necrosis factor, alpha-induced protein 1 (endothelial)	NM_001159392 /// NM_009395 /// XM_006533152	21927	ENSMUSG00000017615 /// OTTMUSG00000000144	chr11	78522868	78536186	-	0006260 // DNA replication // not recorded /// 0006955 // immune response // inferred from sequence or structural similarity /// 0006955 // immune response // inferred from electronic annotation /// 0009790 // embryo development // inferred from expression pattern /// 0016477 // cell migration // not recorded /// 0016567 // protein ubiquitination // not recorded /// 0035024 // negative regulation…	0005634 // nucleus // inferred from electronic annotation /// 0005730 // nucleolus // not recorded /// 0005737 // cytoplasm // not recorded /// 0005768 // endosome // not recorded /// 0031463 // Cul3-RING ubiquitin ligase complex // not recorded	0004842 // ubiquitin-protein transferase activity // not recorded /// 0005515 // protein binding // inferred from electronic annotation /// 0017049 // GTP-Rho binding // not recorded /// 0019904 // protein domain specific binding // not recorded	---
1417884_at	0.015706	4.91295	10.3557	10.6477	11.7106	P	P	P	8.25178	8.70378	9.11281	P	P	P	1417884_at	Slc16a6	solute carrier family 16 (monocarboxylic acid transporters), member 6	NM_001029842 /// NM_134038 /// XM_006531945 /// XM_006531946 /// XM_006531947	104681	ENSMUSG00000041920 /// OTTMUSG00000003343	chr11	109452529	109473229	-	0006810 // transport // inferred from electronic annotation /// 0055085 // transmembrane transport // inferred from electronic annotation	0005886 // plasma membrane // inferred from electronic annotation /// 0016020 // membrane // inferred from electronic annotation /// 0016021 // integral component of membrane // inferred from electronic annotation	0015293 // symporter activity // inferred from electronic annotation	---
1417892_a_at	0.0241929	0.279232	8.59462	8.96409	9.63749	P	P	P	11.0128	10.9659	10.9358	P	P	P	1417892_a_at	Sirt3	sirtuin 3	NM_001127351 /// NM_001177804 /// NM_022433 /// XM_006536222 /// XM_006536223	64384	ENSMUSG00000025486 /// OTTMUSG00000023441	chr7	140863665	140882309	-	0006476 // protein deacetylation // inferred from direct assay /// 0006476 // protein deacetylation // not recorded /// 0009060 // aerobic respiration // not recorded /// 0034983 // peptidyl-lysine deacetylation // not recorded /// 0070932 // histone H3 deacetylation // inferred from direct assay	0005737 // cytoplasm // inferred from direct assay /// 0005739 // mitochondrion // inferred from direct assay /// 0005739 // mitochondrion // not recorded /// 0005759 // mitochondrial matrix // inferred from electronic annotation /// 0016020 // membrane // inferred from direct assay	0004407 // histone deacetylase activity // inferred from electronic annotation /// 0005515 // protein binding // inferred from physical interaction /// 0008270 // zinc ion binding // not recorded /// 0008418 // protein-N-terminal asparagine amidohydrolase activity // inferred from electronic annotation /// 0008759 // UDP-3-O-[3-hydroxymyristoyl] N-acetylglucosamine deacetylase activity // inferre…	---
1417896_at	0.0450693	0.370111	6.59506	6.52127	5.5132	P	P	P	7.73872	7.58957	7.82384	P	P	P	1417896_at	Tjp3	tight junction protein 3	NM_001282095 /// NM_001282096 /// NM_013769 /// XM_006513708 /// XM_006513709	27375	ENSMUSG00000034917	chr10	81273187	81291234	-	2000045 // regulation of G1/S transition of mitotic cell cycle // inferred from genetic interaction	0005634 // nucleus // not recorded /// 0005886 // plasma membrane // inferred from electronic annotation /// 0005923 // tight junction // inferred from direct assay /// 0005923 // tight junction // not recorded /// 0009986 // cell surface // not recorded /// 0016020 // membrane // inferred from electronic annotation /// 0016324 // apical plasma membrane // inferred from direct assay /// 0030054 /…	0005515 // protein binding // inferred from physical interaction	---
1417897_at	0.0302374	2.48143	8.20547	8.34376	8.39637	P	M	M	6.71616	6.67529	7.47837	A	A	A	1417897_at	Brms1	breast cancer metastasis-suppressor 1	NM_134155 /// XM_006531623 /// XM_006531624 /// XM_006531625	107392	ENSMUSG00000080268	chr19	5041371	5049912	+	0006351 // transcription, DNA-templated // inferred from electronic annotation /// 0006355 // regulation of transcription, DNA-templated // inferred from electronic annotation /// 0006486 // protein glycosylation // inferred from electronic annotation /// 0006486 // protein glycosylation // inferred from mutant phenotype /// 0006915 // apoptotic process // inferred from electronic annotation /// …	0000139 // Golgi membrane // inferred from electronic annotation /// 0005634 // nucleus // not recorded /// 0005737 // cytoplasm // not recorded /// 0005794 // Golgi apparatus // inferred from electronic annotation /// 0016020 // membrane // inferred from electronic annotation /// 0016021 // integral component of membrane // inferred from electronic annotation	0005515 // protein binding // inferred from physical interaction /// 0008532 // N-acetyllactosaminide beta-1,3-N-acetylglucosaminyltransferase activity // inferred from electronic annotation /// 0016740 // transferase activity // inferred from electronic annotation /// 0016757 // transferase activity, transferring glycosyl groups // inferred from electronic annotation /// 0051059 // NF-kappaB bin…	---
1417902_at	0.0483232	2.2637	11.5858	11.2226	12.2989	P	P	P	10.9499	10.3495	10.4061	P	P	P	1417902_at	Slc19a2	solute carrier family 19 (thiamine transporter), member 2	NM_001276455 /// NM_054087	116914	ENSMUSG00000040918 /// OTTMUSG00000031583	chr1	164249045	164265369	+	0006810 // transport // inferred from electronic annotation /// 0015888 // thiamine transport // inferred from direct assay /// 0055085 // transmembrane transport // inferred from electronic annotation /// 0071934 // thiamine transmembrane transport // inferred from mutant phenotype	0005886 // plasma membrane // inferred by curator /// 0005886 // plasma membrane // inferred from direct assay /// 0016020 // membrane // inferred from electronic annotation /// 0016021 // integral component of membrane // inferred from electronic annotation	0005542 // folic acid binding // inferred from electronic annotation /// 0008518 // reduced folate carrier activity // inferred from electronic annotation /// 0015234 // thiamine transmembrane transporter activity // inferred from direct assay /// 0015403 // thiamine uptake transmembrane transporter activity // inferred from mutant phenotype	---
1417914_at	0.000357877	3.09153	9.44494	9.41123	9.54066	P	P	P	7.98735	7.74214	7.77296	P	P	A	1417914_at	Rap2b	RAP2B, member of RAS oncogene family	NM_028712	74012	ENSMUSG00000036894	chr3	61364572	61367742	+	0006184 // GTP catabolic process // inferred from electronic annotation /// 0007165 // signal transduction // inferred from electronic annotation /// 0007264 // small GTPase mediated signal transduction // inferred from electronic annotation /// 0015031 // protein transport // inferred from electronic annotation /// 0030336 // negative regulation of cell migration // inferred from direct assay //…	0005622 // intracellular // inferred from electronic annotation /// 0005768 // endosome // inferred from electronic annotation /// 0005829 // cytosol // inferred from direct assay /// 0005886 // plasma membrane // not recorded /// 0016020 // membrane // inferred from direct assay /// 0055037 // recycling endosome // inferred from direct assay /// 0055038 // recycling endosome membrane // inferred…	0000166 // nucleotide binding // inferred from electronic annotation /// 0003924 // GTPase activity // inferred from electronic annotation /// 0005525 // GTP binding // not recorded /// 0019003 // GDP binding // not recorded /// 0019904 // protein domain specific binding // inferred from physical interaction	---
1417959_at	0.00413321	2.60865	8.21301	7.61613	7.85822	P	P	P	6.22063	6.62576	6.70842	P	P	P	1417959_at	Pdlim7	PDZ and LIM domain 7	NM_001114087 /// NM_001114088 /// NM_026131 /// NR_104287 /// XM_006517344 /// XM_006517345 /// XM_006517346 /// XM_006517347 /// XM_006517348 /// XM_006517349	67399	ENSMUSG00000021493 /// OTTMUSG00000032913	chr13	55506542	55513434	-	0001503 // ossification // inferred from electronic annotation /// 0007275 // multicellular organismal development // inferred from electronic annotation /// 0030036 // actin cytoskeleton organization // inferred from physical interaction /// 0030154 // cell differentiation // inferred from electronic annotation /// 0045669 // positive regulation of osteoblast differentiation // not recorded	0001725 // stress fiber // inferred from direct assay /// 0001726 // ruffle // inferred from direct assay /// 0005634 // nucleus // not recorded /// 0005737 // cytoplasm // inferred from direct assay /// 0005856 // cytoskeleton // inferred from electronic annotation /// 0005925 // focal adhesion // not recorded /// 0015629 // actin cytoskeleton // not recorded /// 0030054 // cell junction // infe…	0005515 // protein binding // inferred from physical interaction /// 0008270 // zinc ion binding // inferred from electronic annotation /// 0046872 // metal ion binding // inferred from electronic annotation	---
1417960_at	0.01408	2.83183	9.81117	9.6172	8.9742	P	P	P	7.45408	8.27164	8.16883	P	P	P	1417960_at	Cpeb1	cytoplasmic polyadenylation element binding protein 1	NM_001252525 /// NM_001252526 /// NM_007755	12877	ENSMUSG00000025586 /// OTTMUSG00000024594	chr7	81347025	81455465	-	0006397 // mRNA processing // inferred from electronic annotation /// 0006417 // regulation of translation // inferred from direct assay /// 0007130 // synaptonemal complex assembly // inferred from mutant phenotype /// 0032869 // cellular response to insulin stimulus // not recorded /// 0048168 // regulation of neuronal synaptic plasticity // inferred from mutant phenotype /// 0071230 // cellula…	0000932 // cytoplasmic mRNA processing body // inferred from electronic annotation /// 0005634 // nucleus // inferred from direct assay /// 0005737 // cytoplasm // inferred from direct assay /// 0005886 // plasma membrane // inferred from electronic annotation /// 0014069 // postsynaptic density // inferred from electronic annotation /// 0016020 // membrane // inferred from direct assay /// 00300…	0000166 // nucleotide binding // inferred from electronic annotation /// 0000900 // translation repressor activity, nucleic acid binding // inferred from direct assay /// 0003676 // nucleic acid binding // inferred from electronic annotation /// 0003723 // RNA binding // inferred from direct assay /// 0003729 // mRNA binding // inferred from direct assay /// 0005515 // protein binding // inferred…	mRNA_processing_binding_Reactome // GenMAPP
1417962_s_at	0.0475758	0.454173	12.8369	13.5553	13.8144	P	P	P	14.72	14.4558	14.6024	P	P	P	1417962_s_at	Ghr	growth hormone receptor	NM_001048147 /// NM_001048178 /// NM_001286370 /// NM_010284 /// XM_006519963 /// XM_006519964 /// XM_006519965 /// XM_006519966	14600	ENSMUSG00000055737 /// OTTMUSG00000030599	chr15	3317759	3583231	-	0000187 // activation of MAPK activity // not recorded /// 0000255 // allantoin metabolic process // inferred from mutant phenotype /// 0006101 // citrate metabolic process // inferred from mutant phenotype /// 0006103 // 2-oxoglutarate metabolic process // inferred from mutant phenotype /// 0006105 // succinate metabolic process // inferred from mutant phenotype /// 0006107 // oxaloacetate metab…	0005576 // extracellular region // inferred from electronic annotation /// 0005615 // extracellular space // not recorded /// 0005634 // nucleus // inferred from direct assay /// 0005634 // nucleus // not recorded /// 0005737 // cytoplasm // not recorded /// 0005739 // mitochondrion // not recorded /// 0005886 // plasma membrane // inferred from direct assay /// 0005886 // plasma membrane // not …	0004896 // cytokine receptor activity // inferred from electronic annotation /// 0004903 // growth hormone receptor activity // inferred from direct assay /// 0004903 // growth hormone receptor activity // not recorded /// 0005515 // protein binding // inferred from physical interaction /// 0017046 // peptide hormone binding // inferred from physical interaction /// 0017046 // peptide hormone bin…	---
1417970_at	0.00158271	0.462534	8.82306	8.91973	8.6099	P	P	P	9.95986	9.93848	9.80373	P	P	P	1417970_at	Atp5s	ATP synthase, H+ transporting, mitochondrial F0 complex, subunit S	NM_026536 /// XM_006516180 /// XM_006516181 /// XM_006516182 /// XM_006516183 /// XM_006516184	68055	ENSMUSG00000054894	chr12	69724967	69744665	+	0006754 // ATP biosynthetic process // inferred from electronic annotation /// 0006810 // transport // inferred from electronic annotation /// 0006811 // ion transport // inferred from electronic annotation /// 0015992 // proton transport // inferred from electronic annotation	0005739 // mitochondrion // inferred from direct assay /// 0005743 // mitochondrial inner membrane // inferred from electronic annotation /// 0016020 // membrane // inferred from electronic annotation /// 0045263 // proton-transporting ATP synthase complex, coupling factor F(o) // inferred from electronic annotation	0046872 // metal ion binding // inferred from electronic annotation	Electron_Transport_Chain // GenMAPP
1418014_a_at	0.00331753	2.20008	10.7308	10.9856	11.1306	P	P	P	9.54339	9.89462	9.98731	P	P	P	1418014_a_at	B4galt1	UDP-Gal:betaGlcNAc beta 1,4- galactosyltransferase, polypeptide 1	NM_022305 /// XM_006537620	14595	ENSMUSG00000028413 /// OTTMUSG00000006610	chr4	40804601	40854535	-	0002064 // epithelial cell development // inferred from mutant phenotype /// 0002526 // acute inflammatory response // inferred from mutant phenotype /// 0005975 // carbohydrate metabolic process // inferred from electronic annotation /// 0005989 // lactose biosynthetic process // inferred from mutant phenotype /// 0006012 // galactose metabolic process // inferred from direct assay /// 0006486 /…	0000138 // Golgi trans cisterna // not recorded /// 0005576 // extracellular region // inferred from electronic annotation /// 0005794 // Golgi apparatus // inferred from direct assay /// 0005794 // Golgi apparatus // not recorded /// 0005886 // plasma membrane // inferred from direct assay /// 0009897 // external side of plasma membrane // not recorded /// 0009986 // cell surface // inferred fro…	0000009 // alpha-1,6-mannosyltransferase activity // inferred from electronic annotation /// 0000026 // alpha-1,2-mannosyltransferase activity // inferred from electronic annotation /// 0000030 // mannosyltransferase activity // inferred from electronic annotation /// 0000033 // alpha-1,3-mannosyltransferase activity // inferred from electronic annotation /// 0001962 // alpha-1,3-galactosyltransf…	---
1418095_at	0.01043	0.347592	5.05665	5.55238	5.18132	P	P	P	6.66032	7.22449	6.40004	P	P	P	1418095_at	Smpx	small muscle protein, X-linked	NM_001252591 /// NM_025357 /// NR_045569 /// NR_103722 /// XR_387086 /// XR_387087	66106	ENSMUSG00000041476 /// OTTMUSG00000019394	chrX	157699117	157752589	+	---	0005634 // nucleus // inferred from direct assay /// 0005737 // cytoplasm // inferred from direct assay /// 0005927 // muscle tendon junction // inferred from direct assay /// 0031430 // M band // inferred from direct assay /// 0043034 // costamere // inferred from direct assay /// 0043292 // contractile fiber // inferred from direct assay	---	Striated_muscle_contraction // GenMAPP
1418097_a_at	0.0294142	2.61604	9.60991	8.95814	8.60287	P	P	P	7.95969	7.70208	7.49387	P	P	P	1418097_a_at	Crlf2	cytokine receptor-like factor 2	NM_001164735 /// NM_016715 /// XM_006535165 /// XM_006535166 /// XM_006535167	57914	ENSMUSG00000033467	chr5	109554708	109559123	-	0002380 // immunoglobulin secretion involved in immune response // inferred from direct assay /// 0006954 // inflammatory response // inferred from mutant phenotype /// 0035745 // T-helper 2 cell cytokine production // inferred from direct assay	0005576 // extracellular region // inferred from electronic annotation /// 0005623 // cell // inferred from direct assay /// 0005886 // plasma membrane // inferred from electronic annotation /// 0016020 // membrane // inferred from electronic annotation /// 0016021 // integral component of membrane // inferred from electronic annotation	0005125 // cytokine activity // not recorded /// 0005515 // protein binding // inferred from electronic annotation	---
1418129_at	0.0240351	2.14477	6.55192	7.18309	6.48005	P	P	P	5.64374	5.86867	5.48205	A	A	A	1418129_at	Dhcr24	24-dehydrocholesterol reductase	NM_053272	74754	ENSMUSG00000034926 /// OTTMUSG00000008196	chr4	106561052	106587648	+	0006629 // lipid metabolic process // inferred from electronic annotation /// 0006694 // steroid biosynthetic process // inferred from electronic annotation /// 0006695 // cholesterol biosynthetic process // inferred from mutant phenotype /// 0006695 // cholesterol biosynthetic process // not recorded /// 0006979 // response to oxidative stress // inferred from sequence or structural similarity /…	0000139 // Golgi membrane // inferred from electronic annotation /// 0005634 // nucleus // not recorded /// 0005737 // cytoplasm // not recorded /// 0005783 // endoplasmic reticulum // not recorded /// 0005789 // endoplasmic reticulum membrane // inferred from electronic annotation /// 0005794 // Golgi apparatus // inferred from electronic annotation /// 0005829 // cytosol // not recorded /// 000…	0003824 // catalytic activity // inferred from electronic annotation /// 0008762 // UDP-N-acetylmuramate dehydrogenase activity // inferred from electronic annotation /// 0016491 // oxidoreductase activity // inferred from electronic annotation /// 0016614 // oxidoreductase activity, acting on CH-OH group of donors // inferred from electronic annotation /// 0016628 // oxidoreductase activity, act…	---
1418133_at	0.028537	3.11778	8.88146	9.57141	8.51495	P	P	P	7.48256	7.23216	7.51909	P	P	P	1418133_at	Bcl3	B cell leukemia/lymphoma 3	NM_033601 /// XM_006539487	12051	ENSMUSG00000053175 /// OTTMUSG00000031375	chr7	19808461	19822715	-	0000060 // protein import into nucleus, translocation // not recorded /// 0002268 // follicular dendritic cell differentiation // inferred from mutant phenotype /// 0002315 // marginal zone B cell differentiation // inferred from mutant phenotype /// 0002455 // humoral immune response mediated by circulating immunoglobulin // inferred from mutant phenotype /// 0002467 // germinal center formation…	0005634 // nucleus // not recorded /// 0005737 // cytoplasm // not recorded /// 0032996 // Bcl3-Bcl10 complex // not recorded /// 0033257 // Bcl3/NF-kappaB2 complex // not recorded /// 0043234 // protein complex // not recorded /// 0045171 // intercellular bridge // not recorded /// 0048471 // perinuclear region of cytoplasm // inferred from electronic annotation	0003677 // DNA binding // inferred from direct assay /// 0003700 // sequence-specific DNA binding transcription factor activity // inferred from direct assay /// 0005515 // protein binding // inferred from physical interaction /// 0008134 // transcription factor binding // not recorded	---
1418150_at	0.00752199	0.451937	7.95967	7.999	7.47186	P	P	P	8.75749	9.08055	9.06478	P	P	P	1418150_at	Mtmr4	myotubularin related protein 4	NM_133215 /// XM_006532383 /// XM_006532384 /// XM_006532385 /// XM_006536434 /// XM_006536435 /// XM_006536436	170749	ENSMUSG00000018401 /// OTTMUSG00000001293	chr11	87592164	87616297	+	0014894 // response to denervation involved in regulation of muscle adaptation // inferred from electronic annotation /// 0016311 // dephosphorylation // inferred from electronic annotation /// 0035335 // peptidyl-tyrosine dephosphorylation // inferred from electronic annotation	0005615 // extracellular space // not recorded /// 0005737 // cytoplasm // inferred from electronic annotation /// 0016020 // membrane // inferred from electronic annotation	0004721 // phosphoprotein phosphatase activity // inferred from electronic annotation /// 0004725 // protein tyrosine phosphatase activity // inferred from electronic annotation /// 0005515 // protein binding // inferred from electronic annotation /// 0016787 // hydrolase activity // inferred from electronic annotation /// 0016791 // phosphatase activity // inferred from electronic annotation ///…	---
1418153_at	0.0224702	0.465245	6.40599	6.78853	6.00847	P	P	P	7.41209	7.21086	7.90563	P	P	P	1418153_at	Lama1	laminin, alpha 1	NM_008480 /// XM_006523717 /// XM_006523718	16772	ENSMUSG00000032796	chr17	67697266	67822641	+	0002011 // morphogenesis of an epithelial sheet // inferred from mutant phenotype /// 0007155 // cell adhesion // inferred from electronic annotation /// 0007166 // cell surface receptor signaling pathway // inferred from direct assay /// 0009888 // tissue development // inferred from mutant phenotype /// 0030155 // regulation of cell adhesion // inferred from electronic annotation /// 0030334 //…	0005576 // extracellular region // inferred from electronic annotation /// 0005578 // proteinaceous extracellular matrix // inferred from direct assay /// 0005604 // basement membrane // inferred from direct assay /// 0005604 // basement membrane // not recorded /// 0005605 // basal lamina // traceable author statement /// 0005606 // laminin-1 complex // inferred from direct assay /// 0005606 // …	0005102 // receptor binding // inferred from electronic annotation /// 0005201 // extracellular matrix structural constituent // inferred from direct assay /// 0005515 // protein binding // inferred from physical interaction /// 0043208 // glycosphingolipid binding // inferred from direct assay	---
1418174_at	0.0461051	0.252954	8.45345	9.7798	8.01982	P	P	P	10.643	11.1324	10.9965	P	P	P	1418174_at	Dbp	D site albumin promoter binding protein	NM_016974 /// XM_006540596 /// XM_006540597	13170	ENSMUSG00000059824 /// OTTMUSG00000023187	chr7	45705175	45710155	+	0001889 // liver development // inferred from electronic annotation /// 0006351 // transcription, DNA-templated // inferred from electronic annotation /// 0006355 // regulation of transcription, DNA-templated // traceable author statement /// 0006366 // transcription from RNA polymerase II promoter // not recorded /// 0007623 // circadian rhythm // traceable author statement /// 0045944 // positi…	0005634 // nucleus // not recorded /// 0005654 // nucleoplasm // traceable author statement	0000977 // RNA polymerase II regulatory region sequence-specific DNA binding // not recorded /// 0001077 // RNA polymerase II core promoter proximal region sequence-specific DNA binding transcription factor activity involved in positive regulation of transcription // not recorded /// 0003677 // DNA binding // inferred from electronic annotation /// 0003700 // sequence-specific DNA binding transcr…	---
1418203_at	0.0266595	2.73276	10.6556	9.74134	10.3803	P	P	P	8.60695	9.41251	8.32115	P	P	P	1418203_at	Pmaip1	phorbol-12-myristate-13-acetate-induced protein 1	NM_021451	58801	ENSMUSG00000024521	chr18	66458573	66465560	+	0001836 // release of cytochrome c from mitochondria // inferred from direct assay /// 0001836 // release of cytochrome c from mitochondria // inferred from mutant phenotype /// 0006915 // apoptotic process // not recorded /// 0006919 // activation of cysteine-type endopeptidase activity involved in apoptotic process // inferred from direct assay /// 0006974 // cellular response to DNA damage sti…	0005622 // intracellular // inferred from mutant phenotype /// 0005634 // nucleus // inferred from electronic annotation /// 0005739 // mitochondrion // inferred from direct assay /// 0005739 // mitochondrion // not recorded /// 0005829 // cytosol // inferred from electronic annotation	0005515 // protein binding // inferred from physical interaction	---
1418219_at	0.0258924	0.323119	8.39691	8.17376	7.32361	P	P	P	9.52887	9.87191	9.56396	P	P	P	1418219_at	Il15	interleukin 15	NM_001254747 /// NM_008357 /// XM_006530705 /// XM_006530706 /// XM_006530707 /// XM_006530708 /// XM_006530709 /// XM_006530710 /// XM_006530711 /// XM_006530712 /// XM_006530713 /// XM_006530714 /// XM_006530715	16168	ENSMUSG00000031712	chr8	82331625	82402583	-	0001779 // natural killer cell differentiation // inferred from genetic interaction /// 0001866 // NK T cell proliferation // inferred from mutant phenotype /// 0006954 // inflammatory response // inferred from electronic annotation /// 0006955 // immune response // inferred from electronic annotation /// 0007568 // aging // inferred from electronic annotation /// 0008284 // positive regulation o…	0005576 // extracellular region // inferred from electronic annotation /// 0005615 // extracellular space // not recorded /// 0005634 // nucleus // not recorded /// 0005737 // cytoplasm // inferred from direct assay /// 0005737 // cytoplasm // not recorded /// 0009986 // cell surface // not recorded	0005125 // cytokine activity // inferred from direct assay /// 0005125 // cytokine activity // inferred from mutant phenotype /// 0005126 // cytokine receptor binding // inferred from electronic annotation /// 0005515 // protein binding // inferred from electronic annotation	---
1418226_at	0.000529114	2.15824	9.57947	9.41299	9.6141	P	P	P	8.56473	8.2886	8.41834	P	P	P	1418226_at	Orc2	origin recognition complex, subunit 2	NM_001025378 /// NM_001271526 /// NM_008765 /// XM_006495775	18393	ENSMUSG00000026037 /// OTTMUSG00000021969	chr1	58462770	58504955	-	0006260 // DNA replication // inferred from electronic annotation	0000785 // chromatin // inferred from direct assay /// 0000792 // heterochromatin // inferred from direct assay /// 0000808 // origin recognition complex // not recorded /// 0000939 // condensed chromosome inner kinetochore // inferred from direct assay /// 0005634 // nucleus // not recorded /// 0005664 // nuclear origin of replication recognition complex // inferred from direct assay /// 0005664…	0003688 // DNA replication origin binding // inferred from direct assay /// 0005515 // protein binding // inferred from electronic annotation	Cell_Cycle_KEGG // GenMAPP /// DNA_replication_Reactome // GenMAPP /// G1_to_S_cell_cycle_Reactome // GenMAPP
1418231_at	0.010844	2.95951	9.74952	9.34579	8.84825	P	P	P	7.70401	8.15006	7.44184	P	P	P	1418231_at	Lims1	LIM and senescent cell antigen-like domains 1	NM_001193303 /// NM_026148 /// NM_201242 /// XM_006513068 /// XM_006513069 /// XM_006513070 /// XM_006513071 /// XM_006513072 /// XM_006513073 /// XM_006513074	110829	ENSMUSG00000019920 /// OTTMUSG00000024823	chr10	58323465	58424691	+	0007160 // cell-matrix adhesion // inferred from mutant phenotype /// 0007163 // establishment or maintenance of cell polarity // inferred from mutant phenotype /// 0016337 // single organismal cell-cell adhesion // inferred from mutant phenotype /// 0043009 // chordate embryonic development // inferred from mutant phenotype /// 0043066 // negative regulation of apoptotic process // inferred from…	0005886 // plasma membrane // inferred from electronic annotation /// 0005925 // focal adhesion // inferred from direct assay /// 0005925 // focal adhesion // not recorded /// 0016020 // membrane // inferred from electronic annotation /// 0030054 // cell junction // inferred from electronic annotation /// 0043234 // protein complex // not recorded /// 0048471 // perinuclear region of cytoplasm //…	0005515 // protein binding // inferred from physical interaction /// 0008270 // zinc ion binding // not recorded /// 0046872 // metal ion binding // inferred from electronic annotation	---
1418280_at	0.0360126	11.0474	10.3197	9.48989	11.6784	P	P	P	7.36216	7.41572	7.15151	P	P	P	1418280_at	Klf6	Kruppel-like factor 6	NM_011803	23849	ENSMUSG00000000078	chr13	5861485	5868989	+	0006351 // transcription, DNA-templated // inferred from electronic annotation /// 0006355 // regulation of transcription, DNA-templated // inferred from electronic annotation /// 0019221 // cytokine-mediated signaling pathway // inferred from direct assay /// 0045944 // positive regulation of transcription from RNA polymerase II promoter // not recorded	0005634 // nucleus // inferred from direct assay /// 0005634 // nucleus // not recorded /// 0005737 // cytoplasm // inferred from direct assay	0003676 // nucleic acid binding // inferred from electronic annotation /// 0003677 // DNA binding // inferred from sequence or structural similarity /// 0003690 // double-stranded DNA binding // not recorded /// 0003700 // sequence-specific DNA binding transcription factor activity // not recorded /// 0046872 // metal ion binding // inferred from electronic annotation	---
1418283_at	0.039535	9.43373	12.1477	10.9406	13.1241	P	P	P	9.12368	8.91238	9.21928	A	A	A	1418283_at	Cldn4	claudin 4	NM_009903	12740	ENSMUSG00000047501	chr5	134945122	134947082	-	0007565 // female pregnancy // inferred from electronic annotation /// 0016338 // calcium-independent cell-cell adhesion // inferred from sequence or structural similarity /// 0032570 // response to progesterone // inferred from electronic annotation	0005886 // plasma membrane // inferred from direct assay /// 0005923 // tight junction // inferred from direct assay /// 0009925 // basal plasma membrane // not recorded /// 0016020 // membrane // inferred from electronic annotation /// 0016021 // integral component of membrane // non-traceable author statement /// 0016324 // apical plasma membrane // not recorded /// 0016327 // apicolateral plas…	0005198 // structural molecule activity // inferred from electronic annotation /// 0005515 // protein binding // inferred from physical interaction /// 0042802 // identical protein binding // inferred from sequence or structural similarity	---
1418288_at	0.0227422	0.355747	8.42995	9.1651	9.41594	P	P	P	10.3238	10.7356	10.5667	P	P	P	1418288_at	Lpin1	lipin 1	NM_001130412 /// NM_015763 /// NM_172950 /// XM_006514975 /// XM_006514976 /// XM_006514977 /// XM_006514978 /// XM_006514979 /// XM_006514980 /// XM_006514981 /// XM_006514982 /// XM_006514983 /// XM_006514984 /// XM_006514985 /// XM_006514986 /// XM_006514987 /// XM_006514988	14245	ENSMUSG00000020593	chr12	16535950	16589769	-	0000122 // negative regulation of transcription from RNA polymerase II promoter // inferred from genetic interaction /// 0000266 // mitochondrial fission // inferred from direct assay /// 0006351 // transcription, DNA-templated // inferred from electronic annotation /// 0006355 // regulation of transcription, DNA-templated // inferred from electronic annotation /// 0006357 // regulation of transc…	0005634 // nucleus // inferred from direct assay /// 0005667 // transcription factor complex // inferred from direct assay /// 0005737 // cytoplasm // inferred from direct assay /// 0005739 // mitochondrion // inferred from electronic annotation /// 0005741 // mitochondrial outer membrane // inferred from direct assay /// 0005783 // endoplasmic reticulum // inferred from electronic annotation ///…	0001085 // RNA polymerase II transcription factor binding // inferred from direct assay /// 0003713 // transcription coactivator activity // inferred from direct assay /// 0005515 // protein binding // inferred from physical interaction /// 0008195 // phosphatidate phosphatase activity // inferred from direct assay /// 0016787 // hydrolase activity // inferred from electronic annotation /// 00428…	---
1418305_s_at	0.00731128	2.54424	10.8264	10.2732	10.2793	P	P	P	9.01703	9.48352	8.82858	P	P	P	1418305_s_at	Gar1	GAR1 ribonucleoprotein homolog (yeast)	NM_026578 /// XM_006501963	68147	ENSMUSG00000028010 /// OTTMUSG00000028857	chr3	129824911	129831313	-	0001522 // pseudouridine synthesis // inferred from electronic annotation /// 0006364 // rRNA processing // inferred from electronic annotation /// 0042254 // ribosome biogenesis // inferred from electronic annotation	0001651 // dense fibrillar component // not recorded /// 0005634 // nucleus // inferred from electronic annotation /// 0005730 // nucleolus // inferred from electronic annotation /// 0015030 // Cajal body // inferred from electronic annotation /// 0030529 // ribonucleoprotein complex // inferred from electronic annotation /// 0031429 // box H/ACA snoRNP complex // inferred from electronic annotat…	0003723 // RNA binding // inferred from electronic annotation /// 0030515 // snoRNA binding // not recorded	---
1418311_at	0.00330322	0.19793	6.00591	6.54955	6.46881	A	A	A	8.60975	8.74876	8.73	P	P	P	1418311_at	Fn3k	fructosamine 3 kinase	NM_001038699 /// NM_022014 /// XM_006533915	63828	ENSMUSG00000025175 /// OTTMUSG00000004677	chr11	121434912	121450491	+	0016310 // phosphorylation // inferred from direct assay /// 0030389 // fructosamine metabolic process // inferred from direct assay	0005829 // cytosol // not recorded	0008443 // phosphofructokinase activity // inferred from electronic annotation /// 0008607 // phosphorylase kinase regulator activity // inferred from electronic annotation /// 0008819 // cobinamide kinase activity // inferred from electronic annotation /// 0010276 // phytol kinase activity // inferred from electronic annotation /// 0016301 // kinase activity // inferred from electronic annotatio…	---
1418321_at	0.00164525	0.407707	10.9048	11.0532	10.6403	P	P	P	12.3231	12.0917	12.0836	P	P	P	1418321_at	Eci1	enoyl-Coenzyme A delta isomerase 1	NM_010023	13177	ENSMUSG00000024132	chr17	24426673	24439316	+	0006629 // lipid metabolic process // inferred from electronic annotation /// 0006631 // fatty acid metabolic process // inferred from electronic annotation /// 0006635 // fatty acid beta-oxidation // inferred from mutant phenotype /// 0008152 // metabolic process // inferred from electronic annotation	0005739 // mitochondrion // inferred from direct assay /// 0005739 // mitochondrion // not recorded /// 0005739 // mitochondrion // traceable author statement /// 0005743 // mitochondrial inner membrane // inferred from direct assay /// 0005759 // mitochondrial matrix // inferred from electronic annotation	0003824 // catalytic activity // inferred from electronic annotation /// 0004165 // dodecenoyl-CoA delta-isomerase activity // inferred from direct assay /// 0004165 // dodecenoyl-CoA delta-isomerase activity // not recorded /// 0016853 // isomerase activity // inferred from electronic annotation /// 0042802 // identical protein binding // not recorded	Mitochondrial_fatty_acid_betaoxidation // GenMAPP
1418327_at	0.00511123	0.440897	10.1597	10.5497	10.0249	P	P	P	11.6119	11.4466	11.2504	P	P	P	1418327_at	1110058L19Rik	RIKEN cDNA 1110058L19 gene	NM_026503	68002	ENSMUSG00000026154 /// OTTMUSG00000022115	chr1	23995936	24005640	-	0045087 // innate immune response // inferred from mutant phenotype	0005576 // extracellular region // inferred from electronic annotation /// 0005739 // mitochondrion // inferred from direct assay	---	---
1418334_at	0.0158828	3.31173	9.26147	9.08252	9.84327	P	P	P	7.71163	7.76767	7.63557	P	P	P	1418334_at	Dbf4	DBF4 homolog (S. cerevisiae)	NM_001190717 /// NM_013726 /// XM_006503589	27214	ENSMUSG00000002297 /// OTTMUSG00000035269	chr5	8396898	8422606	-	0006260 // DNA replication // inferred from electronic annotation /// 0006468 // protein phosphorylation // not recorded /// 0007049 // cell cycle // inferred from electronic annotation /// 0007089 // traversing start control point of mitotic cell cycle // not recorded	0005634 // nucleus // inferred from direct assay	0003676 // nucleic acid binding // inferred from electronic annotation /// 0004674 // protein serine/threonine kinase activity // not recorded /// 0008270 // zinc ion binding // inferred from electronic annotation /// 0046872 // metal ion binding // inferred from electronic annotation	Cell_Cycle_KEGG // GenMAPP /// DNA_replication_Reactome // GenMAPP
1418348_a_at	0.00686363	2.18222	7.46537	7.60352	7.19565	P	P	P	5.98395	6.31816	6.55764	A	A	A	1418348_a_at	Ascc2	activating signal cointegrator 1 complex subunit 2	NM_029291 /// XM_006514874 /// XR_380985	75452	ENSMUSG00000020412 /// OTTMUSG00000005066	chr11	4637745	4683647	+	0006351 // transcription, DNA-templated // inferred from electronic annotation /// 0006355 // regulation of transcription, DNA-templated // inferred from electronic annotation	---	0005515 // protein binding // inferred from electronic annotation	---
1418349_at	0.0341868	3.19426	10.2375	9.97434	11.0401	P	P	P	7.97409	8.68954	9.42579	P	P	P	1418349_at	Hbegf	heparin-binding EGF-like growth factor	NM_010415	15200	ENSMUSG00000024486	chr18	36504927	36515774	-	0001525 // angiogenesis // non-traceable author statement /// 0001832 // blastocyst growth // traceable author statement /// 0007173 // epidermal growth factor receptor signaling pathway // inferred from direct assay /// 0007173 // epidermal growth factor receptor signaling pathway // not recorded /// 0008016 // regulation of heart contraction // inferred from mutant phenotype /// 0016477 // cell…	0005576 // extracellular region // inferred from electronic annotation /// 0005615 // extracellular space // inferred from direct assay /// 0005615 // extracellular space // not recorded /// 0005886 // plasma membrane // inferred from electronic annotation /// 0005887 // integral component of plasma membrane // inferred from direct assay /// 0009986 // cell surface // not recorded /// 0016020 // …	0005154 // epidermal growth factor receptor binding // inferred from direct assay /// 0005154 // epidermal growth factor receptor binding // not recorded /// 0005515 // protein binding // inferred from electronic annotation /// 0008083 // growth factor activity // inferred from direct assay /// 0008083 // growth factor activity // not recorded /// 0008201 // heparin binding // inferred from direc…	---
1418350_at	0.00432916	5.07884	9.82042	9.47867	10.4919	P	P	P	7.13861	7.67913	8.00106	P	P	P	1418350_at	Hbegf	heparin-binding EGF-like growth factor	NM_010415	15200	ENSMUSG00000024486	chr18	36504927	36515774	-	0001525 // angiogenesis // non-traceable author statement /// 0001832 // blastocyst growth // traceable author statement /// 0007173 // epidermal growth factor receptor signaling pathway // inferred from direct assay /// 0007173 // epidermal growth factor receptor signaling pathway // not recorded /// 0008016 // regulation of heart contraction // inferred from mutant phenotype /// 0016477 // cell…	0005576 // extracellular region // inferred from electronic annotation /// 0005615 // extracellular space // inferred from direct assay /// 0005615 // extracellular space // not recorded /// 0005886 // plasma membrane // inferred from electronic annotation /// 0005887 // integral component of plasma membrane // inferred from direct assay /// 0009986 // cell surface // not recorded /// 0016020 // …	0005154 // epidermal growth factor receptor binding // inferred from direct assay /// 0005154 // epidermal growth factor receptor binding // not recorded /// 0005515 // protein binding // inferred from electronic annotation /// 0008083 // growth factor activity // inferred from direct assay /// 0008083 // growth factor activity // not recorded /// 0008201 // heparin binding // inferred from direc…	---
1418355_at	0.0164075	2.07549	10.7563	10.4743	11.0902	P	P	P	9.8551	9.76586	9.59343	P	P	P	1418355_at	Nucb2	nucleobindin 2	NM_001130479 /// NM_016773 /// XM_006508024 /// XM_006508025 /// XM_006508026 /// XM_006508027 /// XM_006508028 /// XR_378260 /// XR_378261	53322	ENSMUSG00000030659 /// OTTMUSG00000043201	chr7	116504368	116540686	+	0006874 // cellular calcium ion homeostasis // traceable author statement	0005576 // extracellular region // inferred from electronic annotation /// 0005634 // nucleus // inferred from direct assay /// 0005635 // nuclear envelope // inferred from electronic annotation /// 0005640 // nuclear outer membrane // inferred from direct assay /// 0005737 // cytoplasm // inferred from direct assay /// 0005783 // endoplasmic reticulum // inferred from direct assay /// 0005793 //…	0003677 // DNA binding // inferred from electronic annotation /// 0005164 // tumor necrosis factor receptor binding // not recorded /// 0005509 // calcium ion binding // inferred from direct assay /// 0005515 // protein binding // inferred from electronic annotation /// 0046872 // metal ion binding // inferred from electronic annotation	---
1418356_at	0.0462117	0.45103	7.11625	7.41525	8.02928	P	P	P	8.7051	8.70231	8.75288	P	P	P	1418356_at	Mpst	mercaptopyruvate sulfurtransferase	NM_001162492 /// NM_001162493 /// NM_138670 /// XM_006520994 /// XM_006520995 /// XM_006520996	246221	ENSMUSG00000071711	chr15	78409739	78414007	+	0008152 // metabolic process // inferred from electronic annotation /// 0008152 // metabolic process // inferred from mutant phenotype /// 0070814 // hydrogen sulfide biosynthetic process // inferred from direct assay	0005737 // cytoplasm // not recorded /// 0005739 // mitochondrion // inferred from direct assay /// 0005739 // mitochondrion // not recorded /// 0005743 // mitochondrial inner membrane // inferred from direct assay /// 0030054 // cell junction // inferred from electronic annotation /// 0043005 // neuron projection // inferred from direct assay /// 0045202 // synapse // inferred from electronic an…	0004792 // thiosulfate sulfurtransferase activity // inferred from electronic annotation /// 0016740 // transferase activity // inferred from electronic annotation /// 0016784 // 3-mercaptopyruvate sulfurtransferase activity // inferred from mutant phenotype	---
1418359_at	0.00144316	0.466353	7.145	7.05806	7.4054	P	A	M	8.15151	8.4297	8.33802	P	P	P	1418359_at	Wbscr27	Williams Beuren syndrome chromosome region 27 (human)	NM_024479 /// XM_006504522 /// XM_006504523 /// XM_006504524 /// XM_006504525 /// XM_006504526 /// XM_006504527 /// XM_006504528 /// XM_006504529 /// XM_006504530 /// XM_006504531 /// XM_006504532	79565	ENSMUSG00000040557 /// OTTMUSG00000025980	chr5	134932398	134941222	+	0008152 // metabolic process // inferred from electronic annotation /// 0032259 // methylation // inferred from electronic annotation	---	0008168 // methyltransferase activity // inferred from electronic annotation	---
1418373_at	0.00698558	0.255205	9.26917	9.25581	9.26697	P	P	P	11.5388	11.1011	11.0051	P	P	P	1418373_at	Pgam2	phosphoglycerate mutase 2	NM_018870	56012	ENSMUSG00000020475 /// OTTMUSG00000005095	chr11	5801636	5803796	-	0006094 // gluconeogenesis // not recorded /// 0006096 // glycolytic process // inferred from direct assay /// 0006096 // glycolytic process // not recorded /// 0006941 // striated muscle contraction // not recorded /// 0007283 // spermatogenesis // inferred from electronic annotation /// 0008152 // metabolic process // inferred from electronic annotation /// 0010035 // response to inorganic subs…	0005634 // nucleus // not recorded /// 0005829 // cytosol // not recorded	0003824 // catalytic activity // inferred from electronic annotation /// 0004082 // bisphosphoglycerate mutase activity // inferred from electronic annotation /// 0004083 // bisphosphoglycerate 2-phosphatase activity // inferred from electronic annotation /// 0004619 // phosphoglycerate mutase activity // inferred from direct assay /// 0004619 // phosphoglycerate mutase activity // not recorded /…	Glycolysis_and_Gluconeogenesis // GenMAPP
1418386_at	0.0138735	0.375063	8.31944	8.19116	7.48975	P	P	P	9.58494	9.61529	9.12384	P	P	P	1418386_at	N6amt2	N-6 adenine-specific DNA methyltransferase 2 (putative)	NM_026526 /// XM_006519483	68043	ENSMUSG00000021951	chr14	57549595	57566085	-	0032259 // methylation // inferred from electronic annotation	---	0000179 // rRNA (adenine-N6,N6-)-dimethyltransferase activity // inferred from electronic annotation /// 0003676 // nucleic acid binding // inferred from electronic annotation /// 0003880 // protein C-terminal carboxyl O-methyltransferase activity // inferred from electronic annotation /// 0004809 // tRNA (guanine-N2-)-methyltransferase activity // inferred from electronic annotation /// 0008168 …	---
1418408_at	0.0278009	0.445213	8.74038	8.88363	8.18844	P	P	P	9.74203	9.84844	9.81141	P	P	P	1418408_at	Zfand1	zinc finger, AN1-type domain 1	NM_025512 /// XM_006530080 /// XM_006530081 /// XM_006530082	66361	ENSMUSG00000039795 /// OTTMUSG00000022145	chr2	134762066	134763649	-	---	---	0008270 // zinc ion binding // inferred from electronic annotation /// 0046872 // metal ion binding // inferred from electronic annotation	---
1418432_at	0.0119337	2.09931	9.97937	9.48018	10.0592	P	P	P	8.59276	8.99214	8.76152	P	P	P	1418432_at	Cab39	calcium binding protein 39	NM_133781 /// XM_006529090 /// XM_006529091	12283	ENSMUSG00000036707 /// OTTMUSG00000021589	chr1	85793440	85851577	+	0006468 // protein phosphorylation // not recorded /// 0032147 // activation of protein kinase activity // inferred from direct assay /// 0045860 // positive regulation of protein kinase activity // not recorded /// 0051291 // protein heterooligomerization // inferred from electronic annotation	0005737 // cytoplasm // inferred by curator /// 0043234 // protein complex // inferred from electronic annotation /// 0070062 // extracellular vesicular exosome // not recorded	0004674 // protein serine/threonine kinase activity // not recorded /// 0005488 // binding // inferred from electronic annotation /// 0005509 // calcium ion binding // inferred from sequence or structural similarity /// 0005515 // protein binding // inferred from electronic annotation /// 0019900 // kinase binding // not recorded /// 0030295 // protein kinase activator activity // not recorded	---
1418435_at	0.00254717	2.56779	9.2752	9.35552	9.54386	P	P	P	8.29584	7.86102	7.90896	P	P	P	1418435_at	Mkrn1	makorin, ring finger protein, 1	NM_018810 /// XM_006506396 /// XM_006506397	54484	ENSMUSG00000029922 /// OTTMUSG00000024514	chr6	39397804	39420464	-	0000209 // protein polyubiquitination // not recorded /// 0016567 // protein ubiquitination // inferred from electronic annotation	---	0003682 // chromatin binding // inferred from direct assay /// 0004842 // ubiquitin-protein transferase activity // not recorded /// 0005515 // protein binding // inferred from electronic annotation /// 0008270 // zinc ion binding // inferred from electronic annotation /// 0008766 // UDP-N-acetylmuramoylalanyl-D-glutamyl-2,6-diaminopimelate-D-alanyl-D-alanine ligase activity // inferred from elec…	---
1418450_at	0.00702396	0.358838	5.74272	6.28664	6.47315	P	P	P	7.89663	7.38406	7.70748	P	P	P	1418450_at	Islr	immunoglobulin superfamily containing leucine-rich repeat	NM_001195431 /// NM_012043 /// XM_006511204	26968	ENSMUSG00000037206	chr9	58156266	58159183	-	---	0005576 // extracellular region // inferred from electronic annotation	0005515 // protein binding // inferred from electronic annotation	---
1418457_at	0.00992607	4.24149	7.92407	8.90491	8.42847	P	P	P	6.17612	6.58144	6.38243	P	P	P	1418457_at	Cxcl14	chemokine (C-X-C motif) ligand 14	NM_019568 /// XM_006517307 /// XM_006517308	57266	ENSMUSG00000021508	chr13	56288552	56296551	-	0006955 // immune response // inferred from electronic annotation /// 0048839 // inner ear development // inferred from direct assay /// 0060326 // cell chemotaxis // inferred from electronic annotation	0005576 // extracellular region // inferred from electronic annotation /// 0005615 // extracellular space // inferred from electronic annotation /// 0005794 // Golgi apparatus // not recorded	0005125 // cytokine activity // inferred from electronic annotation /// 0008009 // chemokine activity // inferred from electronic annotation	---
1418472_at	0.00774759	0.344867	10.5508	10.1834	10.9997	P	P	P	12.2186	12.3701	11.8133	P	P	P	1418472_at	Aspa	aspartoacylase	NM_023113 /// XM_006532010 /// XM_006532011 /// XM_006532012 /// XM_006532013 /// XM_006536285 /// XM_006536286 /// XM_006536287 /// XM_006536288	11484	ENSMUSG00000020774 /// OTTMUSG00000006136	chr11	73304991	73324634	-	0006083 // acetate metabolic process // traceable author statement /// 0008152 // metabolic process // inferred from electronic annotation /// 0022010 // central nervous system myelination // inferred from electronic annotation /// 0048714 // positive regulation of oligodendrocyte differentiation // not recorded	0005634 // nucleus // not recorded /// 0005737 // cytoplasm // not recorded	0004046 // aminoacylase activity // traceable author statement /// 0016787 // hydrolase activity // inferred from electronic annotation /// 0016788 // hydrolase activity, acting on ester bonds // inferred from electronic annotation /// 0016811 // hydrolase activity, acting on carbon-nitrogen (but not peptide) bonds, in linear amides // inferred from electronic annotation /// 0019807 // aspartoacy…	---
1418486_at	0.0333466	0.498984	13.0781	12.9798	12.3025	P	P	P	14.0544	13.6391	13.7599	P	P	P	1418486_at	Vnn1	vanin 1	NM_011704 /// XM_006512718	22361	ENSMUSG00000037440 /// OTTMUSG00000044612	chr10	23894687	23905340	+	0002526 // acute inflammatory response // inferred from direct assay /// 0002544 // chronic inflammatory response // inferred from direct assay /// 0006807 // nitrogen compound metabolic process // inferred from electronic annotation /// 0006954 // inflammatory response // inferred from mutant phenotype /// 0015939 // pantothenate metabolic process // not recorded /// 0016337 // single organismal…	0005615 // extracellular space // inferred from direct assay /// 0005886 // plasma membrane // inferred from electronic annotation /// 0016020 // membrane // inferred from electronic annotation /// 0016021 // integral component of membrane // traceable author statement /// 0031225 // anchored component of membrane // inferred from electronic annotation	0016787 // hydrolase activity // inferred from electronic annotation /// 0016810 // hydrolase activity, acting on carbon-nitrogen (but not peptide) bonds // inferred from electronic annotation /// 0016811 // hydrolase activity, acting on carbon-nitrogen (but not peptide) bonds, in linear amides // inferred from electronic annotation /// 0017159 // pantetheine hydrolase activity // not recorded //…	---
1418511_at	0.0324305	0.497688	7.0605	7.4936	6.69759	P	P	M	8.3021	8.02022	8.04234	P	P	P	1418511_at	Dpt	dermatopontin	NM_019759	56429	ENSMUSG00000026574	chr1	164796643	164824274	+	0007155 // cell adhesion // inferred from electronic annotation /// 0008285 // negative regulation of cell proliferation // inferred from direct assay /// 0030199 // collagen fibril organization // inferred from mutant phenotype	0005576 // extracellular region // inferred from electronic annotation /// 0005578 // proteinaceous extracellular matrix // inferred from electronic annotation /// 0005615 // extracellular space // not recorded /// 0031012 // extracellular matrix // not recorded	---	---
1418535_at	0.0330212	0.494434	7.8169	8.65316	8.02964	P	P	P	9.24577	9.44044	8.95687	P	P	P	1418535_at	Rgl1	ral guanine nucleotide dissociation stimulator,-like 1	NM_016846 /// XM_006529264 /// XM_006529265 /// XM_006529266 /// XM_006529267 /// XM_006529268	19731	ENSMUSG00000026482 /// OTTMUSG00000022514	chr1	152517346	152625155	-	0007165 // signal transduction // inferred from electronic annotation /// 0007264 // small GTPase mediated signal transduction // inferred from electronic annotation /// 0043547 // positive regulation of GTPase activity // inferred from electronic annotation /// 0051056 // regulation of small GTPase mediated signal transduction // inferred from electronic annotation	0005622 // intracellular // inferred from electronic annotation	0005085 // guanyl-nucleotide exchange factor activity // inferred from electronic annotation	---
1418538_at	0.0144805	3.28022	8.13609	7.97922	7.32461	P	P	P	6.29355	6.05826	6.05484	A	A	A	1418538_at	Kdelr3	KDEL (Lys-Asp-Glu-Leu) endoplasmic reticulum protein retention receptor 3	NM_134090 /// XM_006520243	105785	ENSMUSG00000010830	chr15	79516448	79527735	+	0006621 // protein retention in ER lumen // inferred from electronic annotation /// 0006810 // transport // inferred from electronic annotation /// 0015031 // protein transport // inferred from electronic annotation /// 0016192 // vesicle-mediated transport // inferred from electronic annotation	0005783 // endoplasmic reticulum // inferred from electronic annotation /// 0005789 // endoplasmic reticulum membrane // inferred from electronic annotation /// 0016020 // membrane // inferred from electronic annotation /// 0016021 // integral component of membrane // inferred from electronic annotation	0046923 // ER retention sequence binding // inferred from electronic annotation	---
1418540_a_at	0.0103585	2.30445	8.36169	7.74845	8.32201	P	P	P	7.23368	6.79939	6.82065	P	P	P	1418540_a_at	Ptpre	protein tyrosine phosphatase, receptor type, E	NM_011212 /// XM_006507458 /// XM_006507459 /// XM_006507460 /// XM_006507461 /// XM_006507462	19267	ENSMUSG00000041836	chr7	135537480	135686293	+	0006470 // protein dephosphorylation // inferred from electronic annotation /// 0007185 // transmembrane receptor protein tyrosine phosphatase signaling pathway // inferred from direct assay /// 0016311 // dephosphorylation // inferred from electronic annotation /// 0033003 // regulation of mast cell activation // inferred from mutant phenotype /// 0035335 // peptidyl-tyrosine dephosphorylation /…	0005634 // nucleus // not recorded /// 0005737 // cytoplasm // inferred from direct assay /// 0005737 // cytoplasm // not recorded /// 0005886 // plasma membrane // inferred from direct assay /// 0005886 // plasma membrane // not recorded /// 0016020 // membrane // inferred from electronic annotation /// 0016021 // integral component of membrane // inferred from electronic annotation /// 0045111 …	0004721 // phosphoprotein phosphatase activity // inferred from electronic annotation /// 0004725 // protein tyrosine phosphatase activity // inferred from direct assay /// 0005515 // protein binding // inferred from electronic annotation /// 0016787 // hydrolase activity // inferred from electronic annotation /// 0016791 // phosphatase activity // inferred from electronic annotation /// 0042803 …	---
1418563_at	0.0192439	0.485502	9.64457	9.71169	9.13236	P	P	P	10.6831	10.5199	10.4709	P	P	P	1418563_at	Serbp1	serpine1 mRNA binding protein 1	NM_001113564 /// NM_001113565 /// NM_001113566 /// NM_025814	66870	ENSMUSG00000036371	chr6	67266979	67287491	+	0042981 // regulation of apoptotic process // inferred from electronic annotation	0005634 // nucleus // inferred from electronic annotation /// 0005737 // cytoplasm // not recorded /// 0005886 // plasma membrane // inferred from electronic annotation /// 0048471 // perinuclear region of cytoplasm // inferred from electronic annotation /// 0070062 // extracellular vesicular exosome // not recorded	0003723 // RNA binding // inferred from electronic annotation /// 0003730 // mRNA 3'-UTR binding // not recorded /// 0005515 // protein binding // inferred from electronic annotation /// 0044822 // poly(A) RNA binding // not recorded	---
1418571_at	0.00136224	15.2776	12.1953	11.6595	12.6337	P	P	P	7.50108	8.75412	8.32981	A	A	A	1418571_at	Tnfrsf12a	tumor necrosis factor receptor superfamily, member 12a	NM_001161746 /// NM_013749	27279	ENSMUSG00000023905	chr17	23675446	23677437	-	0001525 // angiogenesis // inferred from electronic annotation /// 0006915 // apoptotic process // inferred from electronic annotation /// 0006931 // substrate-dependent cell migration, cell attachment to substrate // inferred from direct assay /// 0007155 // cell adhesion // inferred from direct assay /// 0007275 // multicellular organismal development // inferred from electronic annotation /// …	0001726 // ruffle // inferred from direct assay /// 0005886 // plasma membrane // inferred from direct assay /// 0009986 // cell surface // inferred from direct assay /// 0016020 // membrane // inferred from electronic annotation /// 0016021 // integral component of membrane // inferred from electronic annotation	0005515 // protein binding // inferred from physical interaction	---
1418572_x_at	0.00154239	17.4146	12.2064	11.7724	12.5523	P	P	P	7.26876	8.41748	8.32663	M	P	P	1418572_x_at	Tnfrsf12a	tumor necrosis factor receptor superfamily, member 12a	NM_001161746 /// NM_013749	27279	ENSMUSG00000023905	chr17	23675446	23677437	-	0001525 // angiogenesis // inferred from electronic annotation /// 0006915 // apoptotic process // inferred from electronic annotation /// 0006931 // substrate-dependent cell migration, cell attachment to substrate // inferred from direct assay /// 0007155 // cell adhesion // inferred from direct assay /// 0007275 // multicellular organismal development // inferred from electronic annotation /// …	0001726 // ruffle // inferred from direct assay /// 0005886 // plasma membrane // inferred from direct assay /// 0009986 // cell surface // inferred from direct assay /// 0016020 // membrane // inferred from electronic annotation /// 0016021 // integral component of membrane // inferred from electronic annotation	0005515 // protein binding // inferred from physical interaction	---
1418600_at	0.0198813	0.465704	6.13512	5.77416	6.49749	P	A	M	7.40164	7.29125	7.09511	P	P	P	1418600_at	Klf1	Kruppel-like factor 1 (erythroid)	NM_010635	16596	ENSMUSG00000054191	chr8	84901927	84905294	+	0001701 // in utero embryonic development // inferred from mutant phenotype /// 0001889 // liver development // inferred from mutant phenotype /// 0006338 // chromatin remodeling // inferred from direct assay /// 0006351 // transcription, DNA-templated // inferred from electronic annotation /// 0006355 // regulation of transcription, DNA-templated // inferred from electronic annotation /// 003021…	0000790 // nuclear chromatin // not recorded /// 0005634 // nucleus // not recorded	0000987 // core promoter proximal region sequence-specific DNA binding // not recorded /// 0003676 // nucleic acid binding // inferred from electronic annotation /// 0003677 // DNA binding // inferred from sequence or structural similarity /// 0019904 // protein domain specific binding // inferred from physical interaction /// 0033613 // activating transcription factor binding // inferred from ph…	---
1418626_a_at	0.0032848	2.8844	13.9857	13.8525	13.3897	P	P	P	12.3518	12.3727	11.9451	P	P	P	1418626_a_at	Clu	clusterin	NM_013492 /// XM_006518503 /// XM_006518504	12759	ENSMUSG00000022037 /// OTTMUSG00000032654	chr14	65968654	65981543	+	0000902 // cell morphogenesis // not recorded /// 0001774 // microglial cell activation // not recorded /// 0008219 // cell death // inferred from electronic annotation /// 0008284 // positive regulation of cell proliferation // not recorded /// 0009615 // response to virus // inferred from electronic annotation /// 0017038 // protein import // not recorded /// 0031018 // endocrine pancreas devel…	0005576 // extracellular region // inferred from electronic annotation /// 0005615 // extracellular space // not recorded /// 0005634 // nucleus // inferred from electronic annotation /// 0005737 // cytoplasm // not recorded /// 0005739 // mitochondrion // not recorded /// 0005783 // endoplasmic reticulum // inferred from electronic annotation /// 0005829 // cytosol // inferred from electronic an…	0005515 // protein binding // inferred from physical interaction /// 0016887 // ATPase activity // inferred from sequence or structural similarity /// 0031625 // ubiquitin protein ligase binding // not recorded /// 0051787 // misfolded protein binding // not recorded	---
1418655_at	0.0358566	4.25947	8.19148	8.20076	7.02338	P	P	M	5.80918	5.76797	5.85014	A	A	A	1418655_at	B4galnt1	beta-1,4-N-acetyl-galactosaminyl transferase 1	NM_001244617 /// NM_001244618 /// NM_008080 /// NM_027739 /// NR_045166 /// XM_006513217 /// XM_006513218 /// XM_006513219 /// XM_006513220	14421	ENSMUSG00000006731	chr10	127165830	127172584	+	0001574 // ganglioside biosynthetic process // inferred from genetic interaction /// 0001574 // ganglioside biosynthetic process // inferred from mutant phenotype /// 0006486 // protein glycosylation // inferred from electronic annotation /// 0006687 // glycosphingolipid metabolic process // inferred from mutant phenotype /// 0007283 // spermatogenesis // inferred from mutant phenotype /// 001991…	0000139 // Golgi membrane // inferred from electronic annotation /// 0005794 // Golgi apparatus // inferred from electronic annotation /// 0005886 // plasma membrane // not recorded /// 0016020 // membrane // inferred from electronic annotation /// 0016021 // integral component of membrane // inferred from electronic annotation /// 0030173 // integral component of Golgi membrane // inferred from …	0003947 // (N-acetylneuraminyl)-galactosylglucosylceramide N-acetylgalactosaminyltransferase activity // inferred from electronic annotation /// 0008376 // acetylgalactosaminyltransferase activity // not recorded /// 0016740 // transferase activity // inferred from electronic annotation /// 0016757 // transferase activity, transferring glycosyl groups // inferred from electronic annotation /// 00…	---
1418658_at	0.000108698	0.316779	8.73805	8.64411	8.57706	P	P	P	10.4499	10.2431	10.2357	P	P	P	1418658_at	Rmdn1	regulator of microtubule dynamics 1	NM_025476	66302	ENSMUSG00000028229 /// OTTMUSG00000004720	chr4	19575066	19606293	+	---	0000922 // spindle pole // inferred from electronic annotation /// 0005737 // cytoplasm // inferred from electronic annotation /// 0005739 // mitochondrion // inferred from direct assay /// 0005813 // centrosome // inferred from electronic annotation /// 0005819 // spindle // inferred from electronic annotation /// 0005856 // cytoskeleton // inferred from electronic annotation /// 0005874 // micr…	---	---
1418673_at	0.0298419	0.396133	5.54811	4.67511	4.99091	A	A	A	6.37011	6.49059	6.49574	P	P	M	1418673_at	Snai2	snail family zinc finger 2	NM_011415	20583	ENSMUSG00000022676	chr16	14705842	14709388	+	0000122 // negative regulation of transcription from RNA polymerase II promoter // inferred from direct assay /// 0000122 // negative regulation of transcription from RNA polymerase II promoter // inferred from genetic interaction /// 0000122 // negative regulation of transcription from RNA polymerase II promoter // not recorded /// 0001649 // osteoblast differentiation // inferred from electroni…	0000790 // nuclear chromatin // not recorded /// 0005634 // nucleus // inferred from direct assay /// 0005634 // nucleus // not recorded /// 0005737 // cytoplasm // inferred from direct assay	0001078 // RNA polymerase II core promoter proximal region sequence-specific DNA binding transcription factor activity involved in negative regulation of transcription // inferred from direct assay /// 0001078 // RNA polymerase II core promoter proximal region sequence-specific DNA binding transcription factor activity involved in negative regulation of transcription // inferred from genetic inte…	---
1418674_at	0.00579015	2.59555	10.9679	11.4645	10.8635	P	P	P	10.0619	9.47509	9.63979	P	P	P	1418674_at	Osmr	oncostatin M receptor	NM_011019 /// XM_006519973 /// XM_006519974 /// XM_006519975 /// XM_006519976 /// XM_006519977	18414	ENSMUSG00000022146 /// OTTMUSG00000040092	chr15	6813578	6874969	-	0007166 // cell surface receptor signaling pathway // traceable author statement /// 0008284 // positive regulation of cell proliferation // not recorded /// 0019221 // cytokine-mediated signaling pathway // inferred from electronic annotation /// 0034097 // response to cytokine // not recorded /// 0038165 // oncostatin-M-mediated signaling pathway // inferred from direct assay /// 0038165 // onc…	0005887 // integral component of plasma membrane // traceable author statement /// 0005900 // oncostatin-M receptor complex // not recorded /// 0016020 // membrane // inferred from electronic annotation /// 0016021 // integral component of membrane // inferred from electronic annotation	0003824 // catalytic activity // inferred from electronic annotation /// 0004896 // cytokine receptor activity // inferred from electronic annotation /// 0004924 // oncostatin-M receptor activity // inferred from direct assay /// 0004924 // oncostatin-M receptor activity // not recorded /// 0005515 // protein binding // inferred from electronic annotation /// 0019838 // growth factor binding // n…	---
1418675_at	0.0333094	2.9087	7.57016	7.70291	6.66822	P	P	M	6.04775	5.65439	5.79212	A	A	A	1418675_at	Osmr	oncostatin M receptor	NM_011019 /// XM_006519973 /// XM_006519974 /// XM_006519975 /// XM_006519976 /// XM_006519977	18414	ENSMUSG00000022146 /// OTTMUSG00000040092	chr15	6813578	6874969	-	0007166 // cell surface receptor signaling pathway // traceable author statement /// 0008284 // positive regulation of cell proliferation // not recorded /// 0019221 // cytokine-mediated signaling pathway // inferred from electronic annotation /// 0034097 // response to cytokine // not recorded /// 0038165 // oncostatin-M-mediated signaling pathway // inferred from direct assay /// 0038165 // onc…	0005887 // integral component of plasma membrane // traceable author statement /// 0005900 // oncostatin-M receptor complex // not recorded /// 0016020 // membrane // inferred from electronic annotation /// 0016021 // integral component of membrane // inferred from electronic annotation	0003824 // catalytic activity // inferred from electronic annotation /// 0004896 // cytokine receptor activity // inferred from electronic annotation /// 0004924 // oncostatin-M receptor activity // inferred from direct assay /// 0004924 // oncostatin-M receptor activity // not recorded /// 0005515 // protein binding // inferred from electronic annotation /// 0019838 // growth factor binding // n…	---
1418685_at	0.0110905	3.09772	9.21765	9.21113	9.75996	P	P	P	7.75238	7.76827	7.84414	P	P	P	1418685_at	Tirap	toll-interleukin 1 receptor (TIR) domain-containing adaptor protein	NM_001177845 /// NM_001177846 /// NM_001177847 /// NM_054096	117149	ENSMUSG00000032041 /// OTTMUSG00000042147	chr9	35186777	35200291	-	0002376 // immune system process // inferred from electronic annotation /// 0006954 // inflammatory response // inferred from electronic annotation /// 0007165 // signal transduction // inferred from electronic annotation /// 0007166 // cell surface receptor signaling pathway // inferred from physical interaction /// 0007166 // cell surface receptor signaling pathway // not recorded /// 0007249 /…	0005622 // intracellular // inferred from mutant phenotype /// 0005737 // cytoplasm // not recorded /// 0005777 // peroxisome // inferred from direct assay /// 0005886 // plasma membrane // not recorded /// 0016020 // membrane // inferred from electronic annotation /// 0030139 // endocytic vesicle // inferred from direct assay /// 0032587 // ruffle membrane // inferred from direct assay	0005080 // protein kinase C binding // not recorded /// 0005515 // protein binding // inferred from physical interaction /// 0005546 // phosphatidylinositol-4,5-bisphosphate binding // inferred from direct assay /// 0035662 // Toll-like receptor 4 binding // not recorded /// 0035663 // Toll-like receptor 2 binding // inferred from physical interaction /// 0035663 // Toll-like receptor 2 binding /…	---
1418701_at	0.034891	3.41607	11.4306	11.1624	10.225	P	P	P	9.36788	9.3341	9.03124	P	P	P	1418701_at	Comt	catechol-O-methyltransferase	NM_001111062 /// NM_001111063 /// NM_007744	12846	ENSMUSG00000000326 /// ENSMUSG00000098892	chr16	18406881	18426602	-	0006584 // catecholamine metabolic process // inferred from electronic annotation /// 0007565 // female pregnancy // not recorded /// 0007612 // learning // not recorded /// 0008210 // estrogen metabolic process // not recorded /// 0009712 // catechol-containing compound metabolic process // inferred from mutant phenotype /// 0014070 // response to organic cyclic compound // inferred from electro…	0005737 // cytoplasm // inferred from electronic annotation /// 0005739 // mitochondrion // inferred from direct assay /// 0005886 // plasma membrane // inferred from direct assay /// 0016020 // membrane // not recorded /// 0016021 // integral component of membrane // inferred from electronic annotation /// 0043231 // intracellular membrane-bounded organelle // inferred from electronic annotation…	0000287 // magnesium ion binding // inferred from electronic annotation /// 0008168 // methyltransferase activity // inferred from electronic annotation /// 0008171 // O-methyltransferase activity // inferred from electronic annotation /// 0016206 // catechol O-methyltransferase activity // inferred from direct assay /// 0016206 // catechol O-methyltransferase activity // inferred from mutant phe…	Biogenic_Amine_Synthesis // GenMAPP
1418703_at	0.0178628	2.03561	11.8801	11.2582	11.8315	P	P	P	10.8919	10.4128	10.6275	P	P	P	1418703_at	Rbms1	RNA binding motif, single stranded interacting protein 1	NM_001141931 /// NM_001141932 /// NM_020296 /// XM_006499940 /// XM_006499941 /// XM_006499942	56878	ENSMUSG00000026970 /// OTTMUSG00000016821	chr2	60752231	60963386	-	0006260 // DNA replication // inferred from electronic annotation	0005634 // nucleus // inferred from electronic annotation	0000166 // nucleotide binding // inferred from electronic annotation /// 0003676 // nucleic acid binding // inferred from electronic annotation /// 0003677 // DNA binding // inferred from electronic annotation /// 0003723 // RNA binding // inferred from electronic annotation /// 0005515 // protein binding // inferred from electronic annotation /// 0044822 // poly(A) RNA binding // not recorded	mRNA_processing_binding_Reactome // GenMAPP
1418706_at	0.0481837	0.2869	7.10053	8.93202	8.11189	M	P	P	9.92877	9.56111	10.4666	P	P	P	1418706_at	Slc38a3	solute carrier family 38, member 3	NM_001199217 /// NM_001199218 /// NM_023805 /// XM_006511846	76257	ENSMUSG00000010064	chr9	107651154	107659247	-	0006810 // transport // inferred from electronic annotation /// 0006811 // ion transport // inferred from electronic annotation /// 0006814 // sodium ion transport // inferred from electronic annotation /// 0006855 // drug transmembrane transport // not recorded /// 0006865 // amino acid transport // inferred from electronic annotation /// 0006867 // asparagine transport // not recorded /// 00068…	0005886 // plasma membrane // not recorded /// 0005887 // integral component of plasma membrane // inferred from direct assay /// 0005887 // integral component of plasma membrane // not recorded /// 0016020 // membrane // inferred from electronic annotation /// 0016021 // integral component of membrane // inferred from electronic annotation	0005290 // L-histidine transmembrane transporter activity // inferred from direct assay /// 0005290 // L-histidine transmembrane transporter activity // not recorded /// 0015180 // L-alanine transmembrane transporter activity // not recorded /// 0015182 // L-asparagine transmembrane transporter activity // not recorded /// 0015186 // L-glutamine transmembrane transporter activity // inferred from…	---
1418711_at	0.018309	2.20818	10.4091	9.79265	10.51	P	P	P	8.98098	8.92733	9.42133	P	P	P	1418711_at	Pdgfa	platelet derived growth factor, alpha	NM_008808 /// XM_006504658 /// XM_006504659	18590	ENSMUSG00000025856 /// OTTMUSG00000025151	chr5	138976011	138994928	-	0001525 // angiogenesis // inferred from direct assay /// 0001666 // response to hypoxia // inferred from electronic annotation /// 0001942 // hair follicle development // inferred from mutant phenotype /// 0002053 // positive regulation of mesenchymal cell proliferation // inferred from mutant phenotype /// 0007179 // transforming growth factor beta receptor signaling pathway // inferred from el…	0005576 // extracellular region // inferred from electronic annotation /// 0005615 // extracellular space // inferred from direct assay /// 0005615 // extracellular space // not recorded /// 0005902 // microvillus // inferred from direct assay /// 0009986 // cell surface // not recorded /// 0016020 // membrane // inferred from electronic annotation	0005161 // platelet-derived growth factor receptor binding // not recorded /// 0005518 // collagen binding // not recorded /// 0008083 // growth factor activity // not recorded /// 0042803 // protein homodimerization activity // not recorded /// 0046982 // protein heterodimerization activity // not recorded /// 0048407 // platelet-derived growth factor binding // not recorded	---
1418714_at	0.0183105	3.24684	8.58855	7.82568	8.5916	P	P	P	6.62042	6.60981	6.79694	P	P	P	1418714_at	Dusp8	dual specificity phosphatase 8	NM_008748 /// XM_006508509	18218	ENSMUSG00000037887 /// OTTMUSG00000027242	chr7	142081473	142090270	-	0000188 // inactivation of MAPK activity // --- /// 0000188 // inactivation of MAPK activity // inferred from electronic annotation /// 0006470 // protein dephosphorylation // not recorded /// 0016311 // dephosphorylation // inferred from electronic annotation /// 0035335 // peptidyl-tyrosine dephosphorylation // inferred from electronic annotation	0005634 // nucleus // not recorded /// 0005737 // cytoplasm // not recorded	0004721 // phosphoprotein phosphatase activity // inferred from electronic annotation /// 0004725 // protein tyrosine phosphatase activity // inferred from electronic annotation /// 0008138 // protein tyrosine/serine/threonine phosphatase activity // not recorded /// 0016787 // hydrolase activity // inferred from electronic annotation /// 0016791 // phosphatase activity // inferred from electroni…	---
1418715_at	0.0431751	0.391014	11.749	12.4541	12.8449	P	P	P	13.789	13.656	13.8636	P	P	P	1418715_at	Pank1	pantothenate kinase 1	NM_001114339 /// NM_023792 /// XM_006527427	75735	ENSMUSG00000033610	chr19	34810813	34877917	-	0015937 // coenzyme A biosynthetic process // inferred from direct assay /// 0015937 // coenzyme A biosynthetic process // inferred from mutant phenotype /// 0015937 // coenzyme A biosynthetic process // traceable author statement /// 0016310 // phosphorylation // inferred from mutant phenotype	0005634 // nucleus // inferred from direct assay /// 0005829 // cytosol // inferred from direct assay /// 0030118 // clathrin coat // inferred from direct assay /// 0055037 // recycling endosome // inferred from direct assay /// 0071944 // cell periphery // inferred from direct assay	0000166 // nucleotide binding // inferred from electronic annotation /// 0004594 // pantothenate kinase activity // inferred from direct assay /// 0004594 // pantothenate kinase activity // inferred from mutant phenotype /// 0005524 // ATP binding // inferred from electronic annotation /// 0016301 // kinase activity // inferred from electronic annotation /// 0016740 // transferase activity // inf…	---
1418736_at	0.0386045	0.329856	7.7826	7.47177	8.02488	P	P	P	9.42956	9.84845	8.5843	P	P	P	1418736_at	B3galnt1	UDP-GalNAc:betaGlcNAc beta 1,3-galactosaminyltransferase, polypeptide 1	NM_020026 /// XM_006501529	26879	ENSMUSG00000043300	chr3	69573918	69579392	-	0006486 // protein glycosylation // inferred from electronic annotation /// 0009312 // oligosaccharide biosynthetic process // inferred from direct assay	0000139 // Golgi membrane // inferred from electronic annotation /// 0005794 // Golgi apparatus // inferred from electronic annotation /// 0016020 // membrane // inferred from electronic annotation /// 0016021 // integral component of membrane // inferred from electronic annotation	0008378 // galactosyltransferase activity // inferred from electronic annotation /// 0008499 // UDP-galactose:beta-N-acetylglucosamine beta-1,3-galactosyltransferase activity // inferred from direct assay /// 0016740 // transferase activity // inferred from electronic annotation /// 0016757 // transferase activity, transferring glycosyl groups // inferred from electronic annotation /// 0047273 //…	---
1418746_at	0.000367225	0.23007	6.19894	6.65072	6.32177	P	P	P	8.45129	8.38835	8.70948	P	P	P	1418746_at	Pnkd	paroxysmal nonkinesiogenic dyskinesia	NM_001039509 /// NM_019999 /// NM_025580 /// XM_006496167	56695	ENSMUSG00000026179 /// OTTMUSG00000021729	chr1	74332609	74353690	+	0006750 // glutathione biosynthetic process // inferred from electronic annotation /// 0032225 // regulation of synaptic transmission, dopaminergic // inferred from mutant phenotype /// 0042053 // regulation of dopamine metabolic process // inferred from mutant phenotype /// 0050884 // neuromuscular process controlling posture // inferred from mutant phenotype	0005634 // nucleus // inferred from electronic annotation /// 0005737 // cytoplasm // inferred from electronic annotation /// 0005739 // mitochondrion // inferred from direct assay /// 0005739 // mitochondrion // not recorded /// 0016020 // membrane // not recorded	0003923 // GPI-anchor transamidase activity // inferred from electronic annotation /// 0004416 // hydroxyacylglutathione hydrolase activity // inferred from electronic annotation /// 0008270 // zinc ion binding // inferred from electronic annotation /// 0016787 // hydrolase activity // inferred from electronic annotation /// 0046872 // metal ion binding // inferred from electronic annotation /// …	---
1418788_at	0.0315616	0.385217	9.49128	8.8413	8.40223	P	P	P	10.4436	10.0945	10.5031	P	P	P	1418788_at	Tek	endothelial-specific receptor tyrosine kinase	NM_001290549 /// NM_001290551 /// NM_013690 /// XM_006502929 /// XM_006502930	21687	ENSMUSG00000006386 /// OTTMUSG00000007859	chr4	94739299	94874939	+	0001525 // angiogenesis // inferred from mutant phenotype /// 0001525 // angiogenesis // traceable author statement /// 0001569 // patterning of blood vessels // traceable author statement /// 0001570 // vasculogenesis // inferred from mutant phenotype /// 0001666 // response to hypoxia // inferred from electronic annotation /// 0001934 // positive regulation of protein phosphorylation // not rec…	0001725 // stress fiber // not recorded /// 0005576 // extracellular region // inferred from electronic annotation /// 0005737 // cytoplasm // inferred from electronic annotation /// 0005856 // cytoskeleton // inferred from electronic annotation /// 0005884 // actin filament // not recorded /// 0005886 // plasma membrane // inferred from electronic annotation /// 0005887 // integral component of …	0000166 // nucleotide binding // inferred from electronic annotation /// 0004672 // protein kinase activity // inferred from electronic annotation /// 0004713 // protein tyrosine kinase activity // inferred from direct assay /// 0004713 // protein tyrosine kinase activity // not recorded /// 0004714 // transmembrane receptor protein tyrosine kinase activity // inferred from electronic annotation …	---
1418791_at	0.0190717	0.49158	9.26179	9.09416	8.58232	P	P	P	10.3449	9.90967	9.77794	P	P	P	1418791_at	Sh3gl2	SH3-domain GRB2-like 2	NM_019535 /// XM_006537710	20404	ENSMUSG00000028488 /// OTTMUSG00000007959	chr4	85205129	85389382	+	0002090 // regulation of receptor internalization // inferred from direct assay /// 0006897 // endocytosis // inferred from electronic annotation /// 0048488 // synaptic vesicle endocytosis // inferred from genetic interaction	0005623 // cell // inferred from genetic interaction /// 0005737 // cytoplasm // inferred from electronic annotation /// 0016020 // membrane // inferred from electronic annotation	0005515 // protein binding // inferred from physical interaction /// 0008289 // lipid binding // inferred from electronic annotation /// 0042802 // identical protein binding // not recorded	---
1418794_at	0.0429593	2.0257	9.60326	9.75644	8.92559	P	P	P	8.67859	8.3673	8.28088	P	P	P	1418794_at	Cds2	CDP-diacylglycerol synthase (phosphatidate cytidylyltransferase) 2	NM_001291039 /// NM_001291040 /// NM_138651 /// XM_006498584	110911	ENSMUSG00000058793 /// OTTMUSG00000015552	chr2	132263224	132306144	+	0006629 // lipid metabolic process // inferred from electronic annotation /// 0007602 // phototransduction // traceable author statement /// 0008152 // metabolic process // inferred from electronic annotation /// 0008654 // phospholipid biosynthetic process // inferred from electronic annotation /// 0016024 // CDP-diacylglycerol biosynthetic process // inferred from electronic annotation /// 0070…	0005739 // mitochondrion // inferred from electronic annotation /// 0005743 // mitochondrial inner membrane // inferred from electronic annotation /// 0005783 // endoplasmic reticulum // inferred from direct assay /// 0005783 // endoplasmic reticulum // non-traceable author statement /// 0016020 // membrane // inferred from electronic annotation /// 0016021 // integral component of membrane // in…	0004605 // phosphatidate cytidylyltransferase activity // non-traceable author statement /// 0016740 // transferase activity // inferred from electronic annotation /// 0016772 // transferase activity, transferring phosphorus-containing groups // inferred from electronic annotation /// 0016779 // nucleotidyltransferase activity // inferred from electronic annotation	---
1418796_at	0.00147473	0.438231	6.90826	6.86889	6.55272	P	P	P	8.08342	7.76613	8.05576	P	P	P	1418796_at	Clec11a	C-type lectin domain family 11, member a	NM_009131	20256	ENSMUSG00000004473	chr7	44303774	44306931	-	0008284 // positive regulation of cell proliferation // not recorded	0005576 // extracellular region // not recorded /// 0005737 // cytoplasm // inferred from electronic annotation /// 0005813 // centrosome // inferred from electronic annotation	0008083 // growth factor activity // not recorded /// 0030246 // carbohydrate binding // non-traceable author statement	---
1418804_at	0.0367168	0.192849	8.26215	9.39011	7.4738	P	P	P	10.8573	11.2291	10.7628	P	P	P	1418804_at	Sucnr1	succinate receptor 1	NM_032400	84112	ENSMUSG00000027762	chr3	60081860	60087564	+	0007165 // signal transduction // inferred from electronic annotation /// 0007186 // G-protein coupled receptor signaling pathway // inferred from electronic annotation	0005886 // plasma membrane // inferred from electronic annotation /// 0016020 // membrane // inferred from electronic annotation /// 0016021 // integral component of membrane // inferred from electronic annotation /// 0070062 // extracellular vesicular exosome // not recorded	0004871 // signal transducer activity // inferred from electronic annotation /// 0004930 // G-protein coupled receptor activity // inferred from electronic annotation	GPCRDB_Class_A_Rhodopsin-like // GenMAPP
1418822_a_at	0.0131065	2.06511	13.3835	13.1222	13.6074	P	P	P	12.4129	12.3074	12.2917	P	P	P	1418822_a_at	Arf6	ADP-ribosylation factor 6	NM_007481	11845	ENSMUSG00000044147	chr12	69370483	69375104	+	0001889 // liver development // inferred from mutant phenotype /// 0006184 // GTP catabolic process // traceable author statement /// 0006810 // transport // inferred from electronic annotation /// 0006886 // intracellular protein transport // inferred from electronic annotation /// 0007049 // cell cycle // inferred from electronic annotation /// 0007186 // G-protein coupled receptor signaling pa…	0001726 // ruffle // not recorded /// 0005622 // intracellular // inferred from electronic annotation /// 0005634 // nucleus // inferred from electronic annotation /// 0005737 // cytoplasm // inferred from direct assay /// 0005768 // endosome // inferred from direct assay /// 0005768 // endosome // not recorded /// 0005768 // endosome // traceable author statement /// 0005769 // early endosome //…	0000166 // nucleotide binding // inferred from electronic annotation /// 0003924 // GTPase activity // traceable author statement /// 0004871 // signal transducer activity // inferred from electronic annotation /// 0005515 // protein binding // inferred from physical interaction /// 0005525 // GTP binding // traceable author statement /// 0019001 // guanyl nucleotide binding // inferred from elec…	---
1418823_at	0.00381962	3.11664	11.9456	11.2982	11.4093	P	P	P	10.0641	10.074	9.64006	P	P	P	1418823_at	Arf6	ADP-ribosylation factor 6	NM_007481	11845	ENSMUSG00000044147	chr12	69370483	69375104	+	0001889 // liver development // inferred from mutant phenotype /// 0006184 // GTP catabolic process // traceable author statement /// 0006810 // transport // inferred from electronic annotation /// 0006886 // intracellular protein transport // inferred from electronic annotation /// 0007049 // cell cycle // inferred from electronic annotation /// 0007186 // G-protein coupled receptor signaling pa…	0001726 // ruffle // not recorded /// 0005622 // intracellular // inferred from electronic annotation /// 0005634 // nucleus // inferred from electronic annotation /// 0005737 // cytoplasm // inferred from direct assay /// 0005768 // endosome // inferred from direct assay /// 0005768 // endosome // not recorded /// 0005768 // endosome // traceable author statement /// 0005769 // early endosome //…	0000166 // nucleotide binding // inferred from electronic annotation /// 0003924 // GTPase activity // traceable author statement /// 0004871 // signal transducer activity // inferred from electronic annotation /// 0005515 // protein binding // inferred from physical interaction /// 0005525 // GTP binding // traceable author statement /// 0019001 // guanyl nucleotide binding // inferred from elec…	---
1418835_at	0.0232484	3.1428	11.3926	10.2936	10.7535	P	P	P	9.45865	8.96288	9.23241	P	P	P	1418835_at	Phlda1	pleckstrin homology-like domain, family A, member 1	NM_009344	21664	ENSMUSG00000020205 /// OTTMUSG00000035222	chr10	111506285	111508645	+	0006915 // apoptotic process // inferred from electronic annotation /// 0007010 // cytoskeleton organization // inferred from electronic annotation /// 0021879 // forebrain neuron differentiation // inferred from electronic annotation /// 0043065 // positive regulation of apoptotic process // not recorded /// 0045210 // FasL biosynthetic process // inferred from direct assay	0005634 // nucleus // inferred from electronic annotation /// 0005730 // nucleolus // inferred from electronic annotation /// 0005737 // cytoplasm // inferred from electronic annotation /// 0005886 // plasma membrane // inferred from electronic annotation /// 0016020 // membrane // inferred from electronic annotation /// 0030659 // cytoplasmic vesicle membrane // inferred from electronic annotati…	0003779 // actin binding // inferred from electronic annotation /// 0005515 // protein binding // inferred from physical interaction /// 0005543 // phospholipid binding // inferred from electronic annotation	---
1418857_at	0.0136178	0.308108	7.82022	7.91804	8.80589	P	P	P	9.45944	10.024	10.2596	P	P	P	1418857_at	Slc13a2	solute carrier family 13 (sodium-dependent dicarboxylate transporter), member 2	NM_022411 /// XM_006532645 /// XM_006532646 /// XM_006532647 /// XM_006532648 /// XM_006532649	20500	ENSMUSG00000001095 /// OTTMUSG00000000151	chr11	78397301	78422228	-	0006810 // transport // inferred from electronic annotation /// 0006811 // ion transport // inferred from electronic annotation /// 0006814 // sodium ion transport // inferred from electronic annotation /// 0055085 // transmembrane transport // inferred from electronic annotation	0016020 // membrane // inferred from electronic annotation /// 0016021 // integral component of membrane // inferred from electronic annotation /// 0070062 // extracellular vesicular exosome // not recorded	0005215 // transporter activity // inferred from electronic annotation /// 0015293 // symporter activity // inferred from electronic annotation	---
1418862_at	0.0209346	0.470971	9.01005	9.3637	9.66873	P	P	P	10.3515	10.5479	10.4698	P	P	P	1418862_at	Echdc3	enoyl Coenzyme A hydratase domain containing 3	NM_024208	67856	ENSMUSG00000039063 /// OTTMUSG00000011754	chr2	6188464	6213033	-	0008152 // metabolic process // inferred from electronic annotation	0005739 // mitochondrion // inferred from direct assay	0003824 // catalytic activity // inferred from electronic annotation	---
1418892_at	0.0018175	2.2137	10.1241	9.84985	9.99969	P	P	P	9.00896	8.62499	8.88713	P	P	P	1418892_at	Rhoj	ras homolog gene family, member J	NM_023275	80837	ENSMUSG00000046768 /// OTTMUSG00000027646	chr12	75308378	75401456	+	0006184 // GTP catabolic process // inferred from sequence or structural similarity /// 0007165 // signal transduction // inferred from electronic annotation /// 0007264 // small GTPase mediated signal transduction // inferred from electronic annotation /// 0007266 // Rho protein signal transduction // inferred from direct assay /// 0008360 // regulation of cell shape // inferred from direct assa…	0005622 // intracellular // inferred from direct assay /// 0005886 // plasma membrane // inferred from electronic annotation /// 0016020 // membrane // inferred from electronic annotation	0000166 // nucleotide binding // inferred from electronic annotation /// 0003924 // GTPase activity // inferred from sequence or structural similarity /// 0005515 // protein binding // inferred from physical interaction /// 0005525 // GTP binding // inferred from electronic annotation	---
1418897_at	0.0388871	0.402154	4.9831	4.02415	4.94258	A	A	A	5.84588	6.03926	6.17568	P	P	P	1418897_at	F2	coagulation factor II	NM_010168	14061	ENSMUSG00000027249 /// OTTMUSG00000014282	chr2	91625317	91636417	-	0001934 // positive regulation of protein phosphorylation // not recorded /// 0006508 // proteolysis // inferred from mutant phenotype /// 0006953 // acute-phase response // inferred from electronic annotation /// 0007166 // cell surface receptor signaling pathway // not recorded /// 0007596 // blood coagulation // not recorded /// 0007599 // hemostasis // inferred from electronic annotation /// …	0005576 // extracellular region // inferred from electronic annotation /// 0005615 // extracellular space // not recorded /// 0031012 // extracellular matrix // not recorded /// 0072562 // blood microparticle // not recorded	0003824 // catalytic activity // inferred from electronic annotation /// 0004252 // serine-type endopeptidase activity // inferred from direct assay /// 0004252 // serine-type endopeptidase activity // not recorded /// 0005102 // receptor binding // not recorded /// 0005509 // calcium ion binding // inferred from electronic annotation /// 0005515 // protein binding // inferred from physical inter…	Blood_Clotting_Cascade // GenMAPP
1418901_at	0.0395556	4.46433	12.274	12.5877	13.6573	P	P	P	10.7892	10.7789	10.8578	P	P	P	1418901_at	Cebpb	CCAAT/enhancer binding protein (C/EBP), beta	NM_001287738 /// NM_001287739 /// NM_009883	12608	ENSMUSG00000056501 /// OTTMUSG00000016307	chr2	167688914	167690415	+	0001892 // embryonic placenta development // inferred from genetic interaction /// 0006351 // transcription, DNA-templated // inferred from electronic annotation /// 0006355 // regulation of transcription, DNA-templated // not recorded /// 0006366 // transcription from RNA polymerase II promoter // inferred from direct assay /// 0030154 // cell differentiation // inferred from electronic annotati…	0000779 // condensed chromosome, centromeric region // inferred from direct assay /// 0000790 // nuclear chromatin // inferred from direct assay /// 0005634 // nucleus // inferred from direct assay /// 0005634 // nucleus // not recorded /// 0005654 // nucleoplasm // traceable author statement /// 0005737 // cytoplasm // inferred from direct assay /// 0016363 // nuclear matrix // inferred from dir…	0001077 // RNA polymerase II core promoter proximal region sequence-specific DNA binding transcription factor activity involved in positive regulation of transcription // inferred from direct assay /// 0003677 // DNA binding // inferred from direct assay /// 0003677 // DNA binding // not recorded /// 0003682 // chromatin binding // inferred from direct assay /// 0003700 // sequence-specific DNA b…	Circadian_Exercise // GenMAPP /// Ovarian_Infertility_Genes // GenMAPP
1418902_at	0.0120065	0.473994	6.9101	7.42159	6.97388	P	P	M	8.06978	8.23615	8.27805	P	P	P	1418902_at	Chid1	chitinase domain containing 1	NM_001142681 /// NM_026522 /// XM_006536230 /// XM_006536231	68038	ENSMUSG00000025512 /// OTTMUSG00000028950	chr7	141495286	141539832	-	0002376 // immune system process // inferred from electronic annotation /// 0005975 // carbohydrate metabolic process // inferred from electronic annotation /// 0006032 // chitin catabolic process // inferred from electronic annotation /// 0045087 // innate immune response // inferred from electronic annotation /// 1900016 // negative regulation of cytokine production involved in inflammatory res…	0005576 // extracellular region // inferred from electronic annotation /// 0005615 // extracellular space // not recorded /// 0005634 // nucleus // not recorded /// 0005764 // lysosome // not recorded /// 0005770 // late endosome // not recorded /// 0005802 // trans-Golgi network // not recorded /// 0070062 // extracellular vesicular exosome // not recorded	0003824 // catalytic activity // inferred from electronic annotation /// 0004553 // hydrolase activity, hydrolyzing O-glycosyl compounds // inferred from electronic annotation /// 0004568 // chitinase activity // inferred from electronic annotation /// 0070492 // oligosaccharide binding // not recorded	---
1418932_at	0.0155605	4.44711	8.4434	8.12372	9.43327	P	P	P	6.95198	5.92809	6.80426	P	A	P	1418932_at	Nfil3	nuclear factor, interleukin 3, regulated	NM_017373 /// XM_006516875 /// XM_006516876 /// XM_006516877 /// XM_006516878 /// XM_006516879	18030	ENSMUSG00000056749 /// OTTMUSG00000020972	chr13	52967209	52981018	-	0000122 // negative regulation of transcription from RNA polymerase II promoter // not recorded /// 0006351 // transcription, DNA-templated // inferred from electronic annotation /// 0006355 // regulation of transcription, DNA-templated // inferred from electronic annotation /// 0006366 // transcription from RNA polymerase II promoter // not recorded /// 0007623 // circadian rhythm // inferred fr…	0005634 // nucleus // inferred from electronic annotation	0000977 // RNA polymerase II regulatory region sequence-specific DNA binding // not recorded /// 0000979 // RNA polymerase II core promoter sequence-specific DNA binding // inferred from direct assay /// 0001078 // RNA polymerase II core promoter proximal region sequence-specific DNA binding transcription factor activity involved in negative regulation of transcription // not recorded /// 0003677…	---
1418936_at	0.00565752	13.0097	9.96257	9.76062	10.9034	P	P	P	6.67865	6.71547	6.37628	A	A	A	1418936_at	Maff	v-maf musculoaponeurotic fibrosarcoma oncogene family, protein F (avian)	NM_010755 /// XM_006520546 /// XM_006520547 /// XM_006520548 /// XM_006520549 /// XM_006520550	17133	ENSMUSG00000042622	chr15	79347689	79359074	+	0001701 // in utero embryonic development // inferred from genetic interaction /// 0006351 // transcription, DNA-templated // inferred from electronic annotation /// 0006355 // regulation of transcription, DNA-templated // inferred from electronic annotation /// 0035914 // skeletal muscle cell differentiation // inferred from mutant phenotype /// 0045604 // regulation of epidermal cell differenti…	0005634 // nucleus // inferred from electronic annotation /// 0005654 // nucleoplasm // traceable author statement	0003677 // DNA binding // inferred from electronic annotation /// 0003700 // sequence-specific DNA binding transcription factor activity // inferred from electronic annotation /// 0043565 // sequence-specific DNA binding // inferred from electronic annotation	Smooth_muscle_contraction // GenMAPP
1418945_at	0.0218443	3.84701	8.51878	7.61391	7.5823	P	P	P	6.10888	6.07401	5.89951	P	A	A	1418945_at	Mmp3	matrix metallopeptidase 3	NM_010809	17392	ENSMUSG00000043613	chr9	7445821	7455972	+	0006508 // proteolysis // inferred from electronic annotation /// 0030163 // protein catabolic process // inferred from mutant phenotype /// 0030334 // regulation of cell migration // inferred from mutant phenotype /// 0030574 // collagen catabolic process // inferred from electronic annotation /// 0034599 // cellular response to oxidative stress // inferred from mutant phenotype /// 0051898 // n…	0005576 // extracellular region // inferred from electronic annotation /// 0005578 // proteinaceous extracellular matrix // inferred from electronic annotation /// 0005615 // extracellular space // not recorded /// 0005634 // nucleus // not recorded /// 0005739 // mitochondrion // inferred from direct assay /// 0005829 // cytosol // inferred from direct assay /// 0030425 // dendrite // not record…	0004222 // metalloendopeptidase activity // inferred from electronic annotation /// 0005509 // calcium ion binding // inferred from electronic annotation /// 0008233 // peptidase activity // inferred from electronic annotation /// 0008237 // metallopeptidase activity // inferred from electronic annotation /// 0008270 // zinc ion binding // inferred from electronic annotation /// 0016787 // hydrol…	Matrix_Metalloproteinases // GenMAPP
1418949_at	0.00126569	6.62833	11.8901	11.284	11.2429	P	P	P	8.75988	8.57154	8.96733	P	P	P	1418949_at	Gdf15	growth differentiation factor 15	NM_011819 /// XM_006509669	23886	ENSMUSG00000038508 /// OTTMUSG00000023705	chr8	70629392	70632095	-	---	0005576 // extracellular region // inferred from electronic annotation /// 0005615 // extracellular space // inferred from electronic annotation	0005125 // cytokine activity // inferred from electronic annotation /// 0008083 // growth factor activity // inferred from electronic annotation	---
1418971_x_at	0.0160045	2.04849	10.7879	10.1538	10.6033	P	P	P	9.28511	9.63689	9.56713	P	P	P	1418971_x_at	Bcl10	B cell leukemia/lymphoma 10	NM_009740	12042	ENSMUSG00000028191	chr3	145924300	145934358	+	0001783 // B cell apoptotic process // inferred from direct assay /// 0001783 // B cell apoptotic process // inferred from mutant phenotype /// 0001843 // neural tube closure // inferred from mutant phenotype /// 0002237 // response to molecule of bacterial origin // inferred from electronic annotation /// 0002237 // response to molecule of bacterial origin // inferred from sequence or structural…	0001772 // immunological synapse // inferred from direct assay /// 0005622 // intracellular // inferred from mutant phenotype /// 0005634 // nucleus // not recorded /// 0005737 // cytoplasm // inferred from direct assay /// 0005737 // cytoplasm // not recorded /// 0005764 // lysosome // not recorded /// 0005829 // cytosol // inferred from direct assay /// 0005829 // cytosol // not recorded /// 00…	0002020 // protease binding // not recorded /// 0003713 // transcription coactivator activity // not recorded /// 0005515 // protein binding // inferred from physical interaction /// 0008022 // protein C-terminus binding // not recorded /// 0008134 // transcription factor binding // not recorded /// 0008656 // cysteine-type endopeptidase activator activity involved in apoptotic process // not rec…	---
1418972_at	0.0400682	2.93295	9.57021	9.10056	9.52285	P	P	P	6.97749	8.11181	8.20227	A	P	P	1418972_at	Bcl10	B cell leukemia/lymphoma 10	NM_009740	12042	ENSMUSG00000028191	chr3	145924300	145934358	+	0001783 // B cell apoptotic process // inferred from direct assay /// 0001783 // B cell apoptotic process // inferred from mutant phenotype /// 0001843 // neural tube closure // inferred from mutant phenotype /// 0002237 // response to molecule of bacterial origin // inferred from electronic annotation /// 0002237 // response to molecule of bacterial origin // inferred from sequence or structural…	0001772 // immunological synapse // inferred from direct assay /// 0005622 // intracellular // inferred from mutant phenotype /// 0005634 // nucleus // not recorded /// 0005737 // cytoplasm // inferred from direct assay /// 0005737 // cytoplasm // not recorded /// 0005764 // lysosome // not recorded /// 0005829 // cytosol // inferred from direct assay /// 0005829 // cytosol // not recorded /// 00…	0002020 // protease binding // not recorded /// 0003713 // transcription coactivator activity // not recorded /// 0005515 // protein binding // inferred from physical interaction /// 0008022 // protein C-terminus binding // not recorded /// 0008134 // transcription factor binding // not recorded /// 0008656 // cysteine-type endopeptidase activator activity involved in apoptotic process // not rec…	---
1418991_at	0.0349829	2.86322	8.56985	9.05024	7.97651	P	P	P	6.91619	7.20378	7.1048	P	P	P	1418991_at	Bak1	BCL2-antagonist/killer 1	NM_007523 /// XM_006523517 /// XR_385266	12018	ENSMUSG00000057789 /// OTTMUSG00000030987	chr17	27019813	27029009	-	0001776 // leukocyte homeostasis // inferred from genetic interaction /// 0001782 // B cell homeostasis // inferred from genetic interaction /// 0001782 // B cell homeostasis // inferred from mutant phenotype /// 0001783 // B cell apoptotic process // inferred from genetic interaction /// 0001836 // release of cytochrome c from mitochondria // inferred from mutant phenotype /// 0001836 // release…	0005622 // intracellular // inferred from direct assay /// 0005622 // intracellular // inferred from genetic interaction /// 0005739 // mitochondrion // inferred from direct assay /// 0005739 // mitochondrion // not recorded /// 0005783 // endoplasmic reticulum // inferred from direct assay /// 0005783 // endoplasmic reticulum // inferred from genetic interaction /// 0005829 // cytosol // inferre…	0005515 // protein binding // inferred from physical interaction /// 0031072 // heat shock protein binding // not recorded /// 0042802 // identical protein binding // not recorded /// 0042803 // protein homodimerization activity // not recorded /// 0046872 // metal ion binding // inferred from electronic annotation /// 0046982 // protein heterodimerization activity // not recorded /// 0051087 // …	Apoptosis // GenMAPP /// Apoptosis_GenMAPP // GenMAPP
1419017_at	0.0207569	0.0810164	5.15409	4.96759	5.32507	P	A	M	9.03074	7.52688	9.2599	P	P	P	1419017_at	Corin	corin	NM_001122756 /// NM_016869	53419	ENSMUSG00000005220 /// OTTMUSG00000039797	chr5	72299947	72504234	-	0003050 // regulation of systemic arterial blood pressure by atrial natriuretic peptide // inferred from mutant phenotype /// 0003050 // regulation of systemic arterial blood pressure by atrial natriuretic peptide // not recorded /// 0006508 // proteolysis // inferred from mutant phenotype /// 0006508 // proteolysis // not recorded /// 0006898 // receptor-mediated endocytosis // inferred from ele…	0005576 // extracellular region // inferred from electronic annotation /// 0005886 // plasma membrane // inferred from electronic annotation /// 0005887 // integral component of plasma membrane // not recorded /// 0009986 // cell surface // inferred from direct assay /// 0016020 // membrane // inferred from electronic annotation /// 0016021 // integral component of membrane // inferred from elect…	0003824 // catalytic activity // inferred from electronic annotation /// 0004252 // serine-type endopeptidase activity // inferred from mutant phenotype /// 0004252 // serine-type endopeptidase activity // not recorded /// 0005044 // scavenger receptor activity // inferred from electronic annotation /// 0005515 // protein binding // inferred from electronic annotation /// 0008233 // peptidase act…	---
1419024_at	0.00216829	2.53333	10.2627	9.94798	9.78145	P	P	P	8.73262	8.80555	8.44881	P	P	P	1419024_at	Gm13363 /// Ptp4a1	predicted gene 13363 /// protein tyrosine phosphatase 4a1	NM_011200 /// NR_002688 /// XM_006495798 /// XM_006495799	19243 /// 433406	ENSMUSG00000026064 /// OTTMUSG00000021326	chr1	30940894	30949755	-	0006470 // protein dephosphorylation // inferred from electronic annotation /// 0007049 // cell cycle // inferred from electronic annotation /// 0007275 // multicellular organismal development // inferred from electronic annotation /// 0016311 // dephosphorylation // inferred from electronic annotation /// 0030335 // positive regulation of cell migration // inferred from direct assay /// 0035335 …	0005634 // nucleus // not recorded /// 0005737 // cytoplasm // not recorded /// 0005768 // endosome // traceable author statement /// 0005769 // early endosome // inferred from electronic annotation /// 0005783 // endoplasmic reticulum // inferred from electronic annotation /// 0005819 // spindle // inferred from electronic annotation /// 0005856 // cytoskeleton // inferred from electronic annota…	0004721 // phosphoprotein phosphatase activity // inferred from electronic annotation /// 0004725 // protein tyrosine phosphatase activity // not recorded /// 0004727 // prenylated protein tyrosine phosphatase activity // traceable author statement /// 0008138 // protein tyrosine/serine/threonine phosphatase activity // inferred from electronic annotation /// 0016787 // hydrolase activity // infe…	---
1419029_at	0.0033134	2.21636	10.0618	10.0281	9.96149	P	P	P	9.04645	8.78094	8.76347	P	P	P	1419029_at	Ero1l	ERO1-like (S. cerevisiae)	NM_015774	50527	ENSMUSG00000021831	chr14	45283091	45318562	-	0006457 // protein folding // inferred from direct assay /// 0006457 // protein folding // not recorded /// 0006810 // transport // inferred from electronic annotation /// 0006915 // apoptotic process // inferred from electronic annotation /// 0019471 // 4-hydroxyproline metabolic process // inferred from genetic interaction /// 0022417 // protein maturation by protein folding // inferred from ge…	0005622 // intracellular // inferred from mutant phenotype /// 0005623 // cell // inferred from mutant phenotype /// 0005783 // endoplasmic reticulum // not recorded /// 0005789 // endoplasmic reticulum membrane // inferred from electronic annotation /// 0016020 // membrane // inferred from electronic annotation /// 0030176 // integral component of endoplasmic reticulum membrane // not recorded	0003756 // protein disulfide isomerase activity // inferred from electronic annotation /// 0005515 // protein binding // inferred from electronic annotation /// 0008113 // peptide-methionine (S)-S-oxide reductase activity // inferred from electronic annotation /// 0015035 // protein disulfide oxidoreductase activity // inferred from direct assay /// 0016491 // oxidoreductase activity // inferred …	---
1419034_at	0.00483412	2.15386	8.55175	8.57925	8.56921	P	P	P	7.2983	7.50545	7.56262	P	P	P	1419034_at	Csnk2a1	casein kinase 2, alpha 1 polypeptide	NM_007788 /// XM_006498657	12995	ENSMUSG00000074698 /// ENSMUSG00000096493 /// OTTMUSG00000015858	chr2	152226841	152281848	+	0006351 // transcription, DNA-templated // inferred from electronic annotation /// 0006355 // regulation of transcription, DNA-templated // inferred from electronic annotation /// 0006468 // protein phosphorylation // inferred from direct assay /// 0006468 // protein phosphorylation // not recorded /// 0006915 // apoptotic process // inferred from electronic annotation /// 0007049 // cell cycle /…	0005634 // nucleus // not recorded /// 0005956 // protein kinase CK2 complex // traceable author statement /// 0016580 // Sin3 complex // not recorded /// 0016581 // NuRD complex // not recorded /// 0031519 // PcG protein complex // not recorded	0000166 // nucleotide binding // inferred from electronic annotation /// 0004672 // protein kinase activity // inferred from electronic annotation /// 0004674 // protein serine/threonine kinase activity // not recorded /// 0004713 // protein tyrosine kinase activity // inferred from electronic annotation /// 0005515 // protein binding // inferred from physical interaction /// 0005524 // ATP bindi…	---
1419043_a_at	0.0266992	0.465429	7.86301	8.45557	7.76228	P	P	P	9.23917	8.67386	9.46806	P	P	P	1419043_a_at	Iigp1	interferon inducible GTPase 1	NM_001146275 /// NM_021792	60440	ENSMUSG00000054072	chr18	60389216	60392629	+	0002376 // immune system process // inferred from electronic annotation /// 0006184 // GTP catabolic process // inferred from sequence or structural similarity /// 0008152 // metabolic process // inferred from electronic annotation /// 0010506 // regulation of autophagy // inferred from mutant phenotype /// 0019221 // cytokine-mediated signaling pathway // traceable author statement /// 0035458 /…	0005634 // nucleus // inferred from electronic annotation /// 0005737 // cytoplasm // inferred from electronic annotation /// 0005783 // endoplasmic reticulum // inferred from electronic annotation /// 0005789 // endoplasmic reticulum membrane // inferred from direct assay /// 0005794 // Golgi apparatus // inferred from electronic annotation /// 0016020 // membrane // inferred from electronic ann…	0000166 // nucleotide binding // inferred from electronic annotation /// 0003924 // GTPase activity // inferred from direct assay /// 0003924 // GTPase activity // inferred from sequence or structural similarity /// 0005525 // GTP binding // inferred from direct assay /// 0016787 // hydrolase activity // inferred from electronic annotation /// 0016817 // hydrolase activity, acting on acid anhydri…	---
1419053_at	0.00550231	2.08246	9.3737	9.68552	9.19126	P	P	P	8.13827	8.3902	8.56008	P	P	P	1419053_at	Pex14	peroxisomal biogenesis factor 14	NM_019781	56273	ENSMUSG00000028975 /// OTTMUSG00000010943	chr4	148960534	149099822	-	0006461 // protein complex assembly // not recorded /// 0006810 // transport // inferred from electronic annotation /// 0007031 // peroxisome organization // not recorded /// 0015031 // protein transport // inferred from electronic annotation /// 0016558 // protein import into peroxisome matrix // not recorded /// 0016560 // protein import into peroxisome matrix, docking // inferred from electron…	0005622 // intracellular // not recorded /// 0005730 // nucleolus // not recorded /// 0005777 // peroxisome // inferred from direct assay /// 0005777 // peroxisome // not recorded /// 0005778 // peroxisomal membrane // inferred from direct assay /// 0005778 // peroxisomal membrane // not recorded /// 0016020 // membrane // inferred from electronic annotation /// 0016021 // integral component of m…	0003714 // transcription corepressor activity // not recorded /// 0005102 // receptor binding // not recorded /// 0005515 // protein binding // inferred from electronic annotation /// 0008017 // microtubule binding // not recorded /// 0047485 // protein N-terminus binding // not recorded /// 0048487 // beta-tubulin binding // not recorded	---
1419063_at	0.00451662	0.278091	10.7941	11.3455	10.689	P	P	P	12.6543	12.9819	12.8022	P	P	P	1419063_at	Ugt8a	UDP galactosyltransferase 8A	NM_011674 /// XM_006501309 /// XM_006501310	22239	ENSMUSG00000032854	chr3	125865320	125915461	-	0002175 // protein localization to paranode region of axon // inferred from mutant phenotype /// 0005975 // carbohydrate metabolic process // inferred from electronic annotation /// 0006629 // lipid metabolic process // inferred from electronic annotation /// 0006665 // sphingolipid metabolic process // inferred from electronic annotation /// 0006682 // galactosylceramide biosynthetic process // …	0005622 // intracellular // inferred from mutant phenotype /// 0005623 // cell // inferred from mutant phenotype /// 0016020 // membrane // inferred from electronic annotation /// 0016021 // integral component of membrane // inferred from electronic annotation	0003851 // 2-hydroxyacylsphingosine 1-beta-galactosyltransferase activity // inferred from electronic annotation /// 0008120 // ceramide glucosyltransferase activity // traceable author statement /// 0008489 // UDP-galactose:glucosylceramide beta-1,4-galactosyltransferase activity // not recorded /// 0016740 // transferase activity // inferred from electronic annotation /// 0016757 // transferase…	---
1419091_a_at	0.0225376	4.45574	13.6086	13.7205	12.591	P	P	P	11.3752	11.0491	11.2539	P	P	P	1419091_a_at	Anxa2	annexin A2	NM_007585 /// XM_006510796	12306	ENSMUSG00000032231 /// OTTMUSG00000030907	chr9	69453651	69491789	+	0001525 // angiogenesis // inferred from mutant phenotype /// 0001765 // membrane raft assembly // not recorded /// 0001934 // positive regulation of protein phosphorylation // not recorded /// 0006900 // membrane budding // not recorded /// 0007589 // body fluid secretion // not recorded /// 0030199 // collagen fibril organization // inferred from mutant phenotype /// 0031340 // positive regulat…	0001725 // stress fiber // inferred from sequence or structural similarity /// 0001726 // ruffle // not recorded /// 0005576 // extracellular region // inferred from electronic annotation /// 0005578 // proteinaceous extracellular matrix // inferred from electronic annotation /// 0005604 // basement membrane // inferred from electronic annotation /// 0005615 // extracellular space // not recorded…	0004859 // phospholipase inhibitor activity // inferred from electronic annotation /// 0005509 // calcium ion binding // inferred from electronic annotation /// 0005515 // protein binding // inferred from physical interaction /// 0005544 // calcium-dependent phospholipid binding // not recorded /// 0005546 // phosphatidylinositol-4,5-bisphosphate binding // not recorded /// 0008092 // cytoskeleta…	Prostaglandin_synthesis_regulation // GenMAPP
1419092_a_at	0.0410755	2.68439	7.80073	8.08489	8.78237	P	P	P	6.47129	6.27756	7.50725	P	P	P	1419092_a_at	Slk	STE20-like kinase	NM_001164639 /// NM_009289 /// XM_006526827	20874	ENSMUSG00000025060 /// OTTMUSG00000029687	chr19	47580018	47644139	+	0006468 // protein phosphorylation // not recorded /// 0006915 // apoptotic process // inferred from electronic annotation /// 0006950 // response to stress // not recorded /// 0016310 // phosphorylation // inferred from electronic annotation /// 0023014 // signal transduction by phosphorylation // not recorded /// 0035556 // intracellular signal transduction // not recorded /// 0046777 // protei…	0005737 // cytoplasm // not recorded /// 0005886 // plasma membrane // inferred from electronic annotation /// 0070062 // extracellular vesicular exosome // not recorded	0000166 // nucleotide binding // inferred from electronic annotation /// 0004672 // protein kinase activity // not recorded /// 0004674 // protein serine/threonine kinase activity // not recorded /// 0004702 // receptor signaling protein serine/threonine kinase activity // not recorded /// 0004713 // protein tyrosine kinase activity // inferred from electronic annotation /// 0005515 // protein bi…	---
1419129_at	0.0460529	0.187858	7.41564	9.08794	9.46233	P	P	P	11.1108	11.1491	11.5879	P	P	P	1419129_at	Slc22a13	solute carrier family 22 (organic cation transporter), member 13	NM_133980 /// XM_006511917	102570	ENSMUSG00000074028	chr9	119192983	119209105	-	0006810 // transport // inferred from electronic annotation /// 0015747 // urate transport // not recorded /// 0055085 // transmembrane transport // inferred from electronic annotation /// 2001142 // nicotinate transport // not recorded	0016020 // membrane // inferred from electronic annotation /// 0016021 // integral component of membrane // inferred from electronic annotation /// 0016324 // apical plasma membrane // not recorded /// 0070062 // extracellular vesicular exosome // not recorded	0005215 // transporter activity // inferred from electronic annotation /// 0022857 // transmembrane transporter activity // inferred from electronic annotation /// 0090416 // nicotinate transporter activity // not recorded	---
1419134_at	0.00937997	0.380687	8.11096	7.89898	8.42358	P	P	P	9.23887	9.3637	9.95445	P	P	P	1419134_at	Rhbg	Rhesus blood group-associated B glycoprotein	NM_021375 /// XM_006501826	58176	ENSMUSG00000001417 /// OTTMUSG00000035936	chr3	88242873	88254702	-	0006810 // transport // inferred from electronic annotation /// 0015695 // organic cation transport // not recorded /// 0015696 // ammonium transport // inferred from direct assay /// 0015696 // ammonium transport // not recorded /// 0070634 // transepithelial ammonium transport // not recorded /// 0072488 // ammonium transmembrane transport // inferred from direct assay /// 0072488 // ammonium t…	0005886 // plasma membrane // not recorded /// 0005887 // integral component of plasma membrane // not recorded /// 0005887 // integral component of plasma membrane // inferred from sequence or structural similarity /// 0014731 // spectrin-associated cytoskeleton // not recorded /// 0016020 // membrane // inferred from direct assay /// 0016021 // integral component of membrane // inferred from el…	0008519 // ammonium transmembrane transporter activity // inferred from direct assay /// 0008519 // ammonium transmembrane transporter activity // not recorded /// 0030506 // ankyrin binding // not recorded	---
1419136_at	0.0338173	0.135402	5.85803	7.47278	7.9787	A	A	M	10.1095	10.0158	10.5149	P	P	P	1419136_at	Akr1c18	aldo-keto reductase family 1, member C18	NM_134066	105349	ENSMUSG00000021214 /// OTTMUSG00000027950	chr13	4132619	4150654	-	0000060 // protein import into nucleus, translocation // not recorded /// 0006709 // progesterone catabolic process // inferred from direct assay /// 0006709 // progesterone catabolic process // inferred from mutant phenotype /// 0007186 // G-protein coupled receptor signaling pathway // not recorded /// 0007567 // parturition // inferred from mutant phenotype /// 0008284 // positive regulation o…	0005622 // intracellular // not recorded /// 0005634 // nucleus // not recorded /// 0005737 // cytoplasm // not recorded /// 0005829 // cytosol // not recorded	0001758 // retinal dehydrogenase activity // not recorded /// 0004032 // alditol:NADP+ 1-oxidoreductase activity // not recorded /// 0004745 // retinol dehydrogenase activity // not recorded /// 0004958 // prostaglandin F receptor activity // not recorded /// 0016491 // oxidoreductase activity // inferred from electronic annotation /// 0016655 // oxidoreductase activity, acting on NAD(P)H, quinon…	---
1419149_at	0.00132563	25.0094	12.2607	11.2287	11.2061	P	P	P	6.55875	7.72936	6.32476	A	P	A	1419149_at	Serpine1	serine (or cysteine) peptidase inhibitor, clade E, member 1	NM_008871	18787	ENSMUSG00000037411	chr5	137061503	137072259	-	0001300 // chronological cell aging // inferred from electronic annotation /// 0001525 // angiogenesis // inferred from electronic annotation /// 0008585 // female gonad development // not recorded /// 0010466 // negative regulation of peptidase activity // inferred from electronic annotation /// 0010469 // regulation of receptor activity // not recorded /// 0010628 // positive regulation of gene…	0005576 // extracellular region // not recorded /// 0005615 // extracellular space // not recorded /// 0031012 // extracellular matrix // not recorded /// 0042583 // chromaffin granule // not recorded	0002020 // protease binding // not recorded /// 0004867 // serine-type endopeptidase inhibitor activity // inferred from direct assay /// 0004867 // serine-type endopeptidase inhibitor activity // not recorded /// 0005102 // receptor binding // not recorded /// 0005515 // protein binding // inferred from physical interaction /// 0030414 // peptidase inhibitor activity // inferred from electronic …	Blood_Clotting_Cascade // GenMAPP /// TGF_Beta_Signaling_Pathway // GenMAPP
1419155_a_at	0.00518626	3.13276	9.29092	9.07432	9.72661	P	P	P	7.59005	7.70565	7.91309	A	A	A	1419155_a_at	Sox4	SRY (sex determining region Y)-box 4	NM_009238	20677	ENSMUSG00000076431 /// OTTMUSG00000000729	chr13	28950649	28953711	-	0001501 // skeletal system development // inferred from mutant phenotype /// 0001666 // response to hypoxia // not recorded /// 0001841 // neural tube formation // inferred from mutant phenotype /// 0002328 // pro-B cell differentiation // inferred from mutant phenotype /// 0003183 // mitral valve morphogenesis // inferred from mutant phenotype /// 0003211 // cardiac ventricle formation // inferr…	0005634 // nucleus // inferred from direct assay /// 0005634 // nucleus // not recorded /// 0005737 // cytoplasm // not recorded /// 0005739 // mitochondrion // not recorded /// 0044798 // nuclear transcription factor complex // inferred from direct assay	0000976 // transcription regulatory region sequence-specific DNA binding // inferred from direct assay /// 0000981 // sequence-specific DNA binding RNA polymerase II transcription factor activity // inferred from direct assay /// 0001046 // core promoter sequence-specific DNA binding // inferred from direct assay /// 0001046 // core promoter sequence-specific DNA binding // not recorded /// 00010…	---
1419156_at	0.00856159	4.2995	9.2754	8.88009	9.97061	P	P	P	7.1545	7.05844	7.72329	M	A	P	1419156_at	Sox4	SRY (sex determining region Y)-box 4	NM_009238	20677	ENSMUSG00000076431 /// OTTMUSG00000000729	chr13	28950649	28953711	-	0001501 // skeletal system development // inferred from mutant phenotype /// 0001666 // response to hypoxia // not recorded /// 0001841 // neural tube formation // inferred from mutant phenotype /// 0002328 // pro-B cell differentiation // inferred from mutant phenotype /// 0003183 // mitral valve morphogenesis // inferred from mutant phenotype /// 0003211 // cardiac ventricle formation // inferr…	0005634 // nucleus // inferred from direct assay /// 0005634 // nucleus // not recorded /// 0005737 // cytoplasm // not recorded /// 0005739 // mitochondrion // not recorded /// 0044798 // nuclear transcription factor complex // inferred from direct assay	0000976 // transcription regulatory region sequence-specific DNA binding // inferred from direct assay /// 0000981 // sequence-specific DNA binding RNA polymerase II transcription factor activity // inferred from direct assay /// 0001046 // core promoter sequence-specific DNA binding // inferred from direct assay /// 0001046 // core promoter sequence-specific DNA binding // not recorded /// 00010…	---
1419169_at	0.0225501	5.10291	11.5262	11.1178	12.4023	P	P	P	9.30072	9.39064	9.59328	P	P	P	1419169_at	Mapk6	mitogen-activated protein kinase 6	NM_015806 /// NM_027418	50772	ENSMUSG00000042688 /// OTTMUSG00000037218	chr9	75386377	75409998	-	0000165 // MAPK cascade // inferred from direct assay /// 0006468 // protein phosphorylation // inferred from direct assay /// 0007049 // cell cycle // inferred from electronic annotation /// 0016310 // phosphorylation // inferred from electronic annotation	0005634 // nucleus // inferred from direct assay /// 0005737 // cytoplasm // inferred from direct assay /// 0005737 // cytoplasm // not recorded	0000166 // nucleotide binding // inferred from electronic annotation /// 0004672 // protein kinase activity // inferred from electronic annotation /// 0004674 // protein serine/threonine kinase activity // inferred from electronic annotation /// 0004707 // MAP kinase activity // inferred from direct assay /// 0004713 // protein tyrosine kinase activity // inferred from electronic annotation /// 0…	Integrin-mediated_cell_adhesion_KEGG // GenMAPP /// S1P_Signaling // GenMAPP
1419182_at	0.037383	0.466619	7.22134	7.31279	7.42056	P	A	A	8.7629	7.96484	8.42392	P	P	P	1419182_at	Svep1	sushi, von Willebrand factor type A, EGF and pentraxin domain containing 1	NM_022814	64817	ENSMUSG00000028369 /// OTTMUSG00000007439	chr4	58042451	58206859	-	0007155 // cell adhesion // inferred from electronic annotation	0005576 // extracellular region // inferred from sequence or structural similarity /// 0005737 // cytoplasm // inferred from electronic annotation /// 0016020 // membrane // inferred from electronic annotation	0003682 // chromatin binding // inferred from direct assay /// 0005509 // calcium ion binding // inferred from electronic annotation /// 0005515 // protein binding // inferred from electronic annotation	---
1419186_a_at	0.0441239	0.456589	7.31049	7.40027	6.41996	P	P	P	8.50219	7.92029	8.23045	P	P	P	1419186_a_at	St8sia4	ST8 alpha-N-acetyl-neuraminide alpha-2,8-sialyltransferase 4	NM_001159745 /// NM_009183 /// XM_006529275	20452	ENSMUSG00000040710	chr1	95587681	95667594	-	0001574 // ganglioside biosynthetic process // not recorded /// 0006486 // protein glycosylation // not recorded /// 0006491 // N-glycan processing // not recorded /// 0009311 // oligosaccharide metabolic process // not recorded /// 0097503 // sialylation // inferred from direct assay /// 0097503 // sialylation // not recorded	0000139 // Golgi membrane // inferred from electronic annotation /// 0005794 // Golgi apparatus // inferred from electronic annotation /// 0016020 // membrane // inferred from electronic annotation /// 0016021 // integral component of membrane // inferred from electronic annotation /// 0030173 // integral component of Golgi membrane // inferred from electronic annotation	0003828 // alpha-N-acetylneuraminate alpha-2,8-sialyltransferase activity // inferred from direct assay /// 0003828 // alpha-N-acetylneuraminate alpha-2,8-sialyltransferase activity // not recorded /// 0008373 // sialyltransferase activity // inferred from electronic annotation /// 0008932 // lytic endotransglycosylase activity // inferred from electronic annotation /// 0016740 // transferase act…	---
1419188_s_at	0.0435859	0.434282	8.17562	8.21951	7.35123	P	P	P	9.26489	9.10129	9.13876	P	P	P	1419188_s_at	Ccl27a /// Ccl27b /// Gm13306 /// Gm2506 /// LOC100861978	chemokine (C-C motif) ligand 27A /// chemokine (C-C motif) ligand 27b /// predicted gene 13306 /// predicted gene 2506 /// c-C motif chemokine 27-like	NM_001048179 /// NM_001164044 /// NM_001164045 /// NM_001164046 /// NM_001199959 /// NM_001199960 /// NM_001199961 /// NM_001199962 /// NM_001199963 /// NM_001199964 /// NM_001199965 /// NM_001199966 /// NM_001267702 /// NM_001267703 /// NM_001267704 /// NM_011336 /// XM_006537492 /// XM_006537493 /// XM_006537494 /// XM_006537495 /// XM_006537496 /// XM_006537497 /// XM_006537498 /// XM_00653749…	20301 /// 100039863 /// 100039939 /// 100040048 /// 100861978	ENSMUSG00000073877 /// ENSMUSG00000073888 /// ENSMUSG00000093828 /// ENSMUSG00000095247 /// ENSMUSG00000096826 /// OTTMUSG00000006697 /// OTTMUSG00000011352	chr4	42655250	42655996	+	0006955 // immune response // inferred from electronic annotation /// 0010820 // positive regulation of T cell chemotaxis // inferred from direct assay /// 0060326 // cell chemotaxis // inferred from electronic annotation /// 0071677 // positive regulation of mononuclear cell migration // inferred from direct assay /// 2000251 // positive regulation of actin cytoskeleton reorganization // inferre…	0005576 // extracellular region // inferred from direct assay /// 0005615 // extracellular space // inferred from electronic annotation /// 0005634 // nucleus // inferred from direct assay	0005125 // cytokine activity // inferred from direct assay /// 0005515 // protein binding // inferred from physical interaction /// 0008009 // chemokine activity // inferred from electronic annotation	---
1419191_at	0.0461037	2.21029	7.85467	7.59859	7.37853	P	P	P	6.77312	5.78987	6.68651	P	P	P	1419191_at	Hipk3	homeodomain interacting protein kinase 3	NM_001145824 /// NM_010434	15259	ENSMUSG00000027177 /// OTTMUSG00000014944	chr2	104429484	104494514	-	0000122 // negative regulation of transcription from RNA polymerase II promoter // inferred from sequence or structural similarity /// 0006351 // transcription, DNA-templated // inferred from electronic annotation /// 0006355 // regulation of transcription, DNA-templated // inferred from electronic annotation /// 0006468 // protein phosphorylation // not recorded /// 0006468 // protein phosphoryl…	0005634 // nucleus // not recorded /// 0005634 // nucleus // inferred from sequence or structural similarity /// 0005737 // cytoplasm // inferred from direct assay /// 0005737 // cytoplasm // not recorded /// 0016020 // membrane // inferred from electronic annotation /// 0016605 // PML body // inferred from direct assay	0000166 // nucleotide binding // inferred from electronic annotation /// 0003677 // DNA binding // inferred from sequence or structural similarity /// 0003714 // transcription corepressor activity // inferred from sequence or structural similarity /// 0004672 // protein kinase activity // not recorded /// 0004672 // protein kinase activity // inferred from sequence or structural similarity /// 00…	---
1419209_at	0.00785355	9.42261	10.389	10.6121	11.8051	P	P	P	7.50625	8.25787	7.64585	P	P	P	1419209_at	Cxcl1	chemokine (C-X-C motif) ligand 1	NM_008176	14825	ENSMUSG00000029380 /// OTTMUSG00000016842	chr5	90891272	90893115	+	0002237 // response to molecule of bacterial origin // not recorded /// 0002526 // acute inflammatory response // not recorded /// 0006954 // inflammatory response // inferred from electronic annotation /// 0006955 // immune response // inferred from electronic annotation /// 0007204 // positive regulation of cytosolic calcium ion concentration // not recorded /// 0010765 // positive regulation o…	0005576 // extracellular region // inferred from electronic annotation /// 0005615 // extracellular space // inferred from direct assay /// 0005615 // extracellular space // not recorded	0005125 // cytokine activity // inferred from electronic annotation /// 0008009 // chemokine activity // not recorded /// 0008083 // growth factor activity // inferred from electronic annotation	---
1419212_at	0.0110669	0.496495	6.44774	6.71607	7.04292	A	A	A	7.62101	7.61008	8.02749	P	M	P	1419212_at	Icosl	icos ligand	NM_015790	50723	ENSMUSG00000000732	chr10	78069301	78079525	+	0002376 // immune system process // inferred from electronic annotation /// 0007165 // signal transduction // non-traceable author statement /// 0042104 // positive regulation of activated T cell proliferation // traceable author statement /// 0042110 // T cell activation // non-traceable author statement /// 0042113 // B cell activation // inferred from electronic annotation /// 0045190 // isoty…	0005887 // integral component of plasma membrane // inferred from direct assay /// 0009897 // external side of plasma membrane // inferred from direct assay /// 0016020 // membrane // inferred from electronic annotation /// 0016021 // integral component of membrane // non-traceable author statement	0005102 // receptor binding // traceable author statement /// 0005515 // protein binding // inferred from physical interaction	---
1419245_at	0.0106349	0.397564	6.3998	6.47388	5.80794	P	P	P	7.74867	7.61524	7.37273	P	P	P	1419245_at	Rab14	RAB14, member RAS oncogene family	NM_026697	68365	ENSMUSG00000026878 /// OTTMUSG00000012919	chr2	35179945	35201120	-	0006184 // GTP catabolic process // not recorded /// 0006810 // transport // inferred from electronic annotation /// 0006886 // intracellular protein transport // inferred from electronic annotation /// 0006895 // Golgi to endosome transport // inferred from mutant phenotype /// 0006913 // nucleocytoplasmic transport // inferred from electronic annotation /// 0007165 // signal transduction // inf…	0000139 // Golgi membrane // inferred from electronic annotation /// 0005622 // intracellular // inferred from mutant phenotype /// 0005622 // intracellular // not recorded /// 0005623 // cell // inferred from mutant phenotype /// 0005634 // nucleus // inferred from electronic annotation /// 0005737 // cytoplasm // inferred from electronic annotation /// 0005764 // lysosome // not recorded /// 00…	0000166 // nucleotide binding // inferred from electronic annotation /// 0001948 // glycoprotein binding // not recorded /// 0003924 // GTPase activity // not recorded /// 0005515 // protein binding // inferred from physical interaction /// 0005525 // GTP binding // not recorded /// 0019003 // GDP binding // not recorded	---
1419308_at	0.00670035	0.329817	7.42304	8.14108	7.67845	P	P	P	9.42472	9.17091	9.51909	P	P	P	1419308_at	Invs	inversin	NM_001281977 /// NM_001281978 /// NM_010569 /// XM_006537626 /// XM_006537627 /// XM_006537628 /// XM_006537629 /// XM_006537630 /// XM_006537631 /// XM_006537632 /// XM_006537633 /// XM_006537634 /// XM_006537635 /// XM_006537636 /// XM_006537637	16348	ENSMUSG00000028344 /// OTTMUSG00000006844	chr4	48279821	48431954	+	0001822 // kidney development // inferred from mutant phenotype /// 0007275 // multicellular organismal development // inferred from electronic annotation /// 0009791 // post-embryonic development // inferred from mutant phenotype /// 0016055 // Wnt signaling pathway // inferred from electronic annotation /// 0031016 // pancreas development // inferred from mutant phenotype /// 0048513 // organ d…	0005634 // nucleus // inferred from electronic annotation /// 0005737 // cytoplasm // inferred from electronic annotation /// 0005819 // spindle // inferred from electronic annotation /// 0005856 // cytoskeleton // inferred from electronic annotation /// 0005874 // microtubule // inferred from electronic annotation /// 0016020 // membrane // inferred from electronic annotation /// 0048471 // peri…	0005515 // protein binding // inferred from physical interaction /// 0005516 // calmodulin binding // inferred from electronic annotation	---
1419322_at	0.0155396	2.7473	7.43206	7.00694	7.94301	P	P	P	6.09394	5.63951	6.34149	P	P	P	1419322_at	Fgd6	FYVE, RhoGEF and PH domain containing 6	NM_053072 /// XM_006513214	13998	ENSMUSG00000020021 /// OTTMUSG00000030985	chr10	94103242	94142004	+	0032321 // positive regulation of Rho GTPase activity // inferred from electronic annotation /// 0035023 // regulation of Rho protein signal transduction // inferred from electronic annotation /// 0043547 // positive regulation of GTPase activity // inferred from electronic annotation	0005737 // cytoplasm // inferred from electronic annotation /// 0005856 // cytoskeleton // inferred from electronic annotation	0005085 // guanyl-nucleotide exchange factor activity // inferred from electronic annotation /// 0005089 // Rho guanyl-nucleotide exchange factor activity // inferred from electronic annotation /// 0005543 // phospholipid binding // inferred from electronic annotation /// 0046872 // metal ion binding // inferred from electronic annotation	---
1419332_at	0.009577	0.179294	7.63304	6.66182	8.01699	P	P	P	10.0489	9.31162	10.4736	P	P	P	1419332_at	Egfl6	EGF-like-domain, multiple 6	NM_019397	54156	ENSMUSG00000000402 /// OTTMUSG00000019543	chrX	166522997	166585712	-	0007155 // cell adhesion // inferred from electronic annotation /// 0007275 // multicellular organismal development // inferred from electronic annotation /// 0010811 // positive regulation of cell-substrate adhesion // inferred from direct assay /// 0030154 // cell differentiation // inferred from electronic annotation /// 0030198 // extracellular matrix organization // inferred from direct assay	0005576 // extracellular region // inferred from electronic annotation /// 0005578 // proteinaceous extracellular matrix // inferred from electronic annotation /// 0005604 // basement membrane // inferred from direct assay /// 0016020 // membrane // inferred from electronic annotation /// 0031012 // extracellular matrix // inferred from direct assay	0005509 // calcium ion binding // inferred from electronic annotation /// 0005515 // protein binding // inferred from electronic annotation	---
1419356_at	0.0167808	3.23775	9.08479	8.26973	9.23111	P	P	P	6.96504	7.18639	7.47612	P	P	P	1419356_at	Klf7	Kruppel-like factor 7 (ubiquitous)	NM_033563 /// XM_006496350 /// XM_006496351 /// XM_006496352 /// XM_006496353 /// XM_006496354 /// XM_006496355	93691	ENSMUSG00000025959 /// OTTMUSG00000013919	chr1	64032793	64121418	-	0006351 // transcription, DNA-templated // inferred from electronic annotation /// 0006355 // regulation of transcription, DNA-templated // inferred from electronic annotation /// 0007409 // axonogenesis // inferred from mutant phenotype /// 0007411 // axon guidance // inferred from mutant phenotype /// 0045893 // positive regulation of transcription, DNA-templated // inferred from direct assay /…	0005634 // nucleus // inferred from electronic annotation	0003676 // nucleic acid binding // inferred from electronic annotation /// 0003677 // DNA binding // inferred from direct assay /// 0003677 // DNA binding // inferred from sequence or structural similarity /// 0003700 // sequence-specific DNA binding transcription factor activity // inferred from direct assay /// 0046872 // metal ion binding // inferred from electronic annotation	---
1419359_at	0.033444	0.391334	8.70913	8.5745	7.83453	P	P	P	9.7179	9.75298	9.84849	P	P	P	1419359_at	Hexim1	hexamethylene bis-acetamide inducible 1	NM_138753	192231	ENSMUSG00000048878 /// OTTMUSG00000003296	chr11	103116250	103119725	+	0000122 // negative regulation of transcription from RNA polymerase II promoter // not recorded /// 0006351 // transcription, DNA-templated // inferred from electronic annotation /// 0006355 // regulation of transcription, DNA-templated // inferred from electronic annotation /// 0007507 // heart development // inferred from mutant phenotype /// 0045736 // negative regulation of cyclin-dependent p…	0005634 // nucleus // inferred from direct assay /// 0005634 // nucleus // not recorded /// 0005737 // cytoplasm // not recorded	0004861 // cyclin-dependent protein serine/threonine kinase inhibitor activity // not recorded /// 0005515 // protein binding // inferred from physical interaction /// 0017069 // snRNA binding // not recorded	---
1419373_at	0.00229397	0.360997	8.66642	8.85494	9.0218	P	P	P	10.0064	10.4855	10.4365	P	P	P	1419373_at	Atp6v1b1	ATPase, H+ transporting, lysosomal V1 subunit B1	NM_134157	110935	ENSMUSG00000006269	chr6	83742999	83759051	+	0001503 // ossification // not recorded /// 0001503 // ossification // inferred from sequence or structural similarity /// 0006810 // transport // inferred from electronic annotation /// 0006811 // ion transport // inferred from electronic annotation /// 0006885 // regulation of pH // inferred from mutant phenotype /// 0006885 // regulation of pH // not recorded /// 0007588 // excretion // not re…	0005737 // cytoplasm // inferred from direct assay /// 0005829 // cytosol // inferred from direct assay /// 0005902 // microvillus // inferred from direct assay /// 0016020 // membrane // inferred from direct assay /// 0016323 // basolateral plasma membrane // inferred from direct assay /// 0016323 // basolateral plasma membrane // not recorded /// 0016324 // apical plasma membrane // inferred fr…	0005524 // ATP binding // inferred from electronic annotation /// 0015078 // hydrogen ion transmembrane transporter activity // inferred from mutant phenotype /// 0016820 // hydrolase activity, acting on acid anhydrides, catalyzing transmembrane movement of substances // inferred from electronic annotation /// 0032403 // protein complex binding // not recorded	---
1419385_a_at	0.00508361	2.25247	10.2093	9.89414	10.2075	P	P	P	8.93807	8.99025	8.88847	P	P	P	1419385_a_at	Ubqln1	ubiquilin 1	NM_026842 /// NM_152234	56085	ENSMUSG00000005312	chr13	58177511	58181625	-	0006289 // nucleotide-excision repair // inferred from electronic annotation /// 0031396 // regulation of protein ubiquitination // not recorded /// 0034976 // response to endoplasmic reticulum stress // not recorded /// 0043161 // proteasome-mediated ubiquitin-dependent protein catabolic process // inferred from electronic annotation /// 0071456 // cellular response to hypoxia // not recorded //…	0000502 // proteasome complex // inferred from electronic annotation /// 0005634 // nucleus // not recorded /// 0005737 // cytoplasm // not recorded /// 0005783 // endoplasmic reticulum // not recorded /// 0043234 // protein complex // not recorded /// 0048471 // perinuclear region of cytoplasm // not recorded	0003684 // damaged DNA binding // inferred from electronic annotation /// 0005102 // receptor binding // non-traceable author statement /// 0005488 // binding // inferred from electronic annotation /// 0005515 // protein binding // inferred from electronic annotation /// 0019215 // intermediate filament binding // non-traceable author statement /// 0019900 // kinase binding // not recorded /// 00…	---
1419392_at	0.0136562	0.390236	7.58253	7.16179	6.71813	P	P	P	8.79671	8.20829	8.59782	P	P	P	1419392_at	Pclo	piccolo (presynaptic cytomatrix protein)	NM_001110796 /// NM_011995 /// XM_006503582 /// XM_006503583 /// XM_006503584 /// XM_006503585 /// XM_006503586	26875	ENSMUSG00000061601 /// OTTMUSG00000043360	chr5	14514917	14796042	+	0007010 // cytoskeleton organization // inferred from direct assay /// 0008152 // metabolic process // inferred from electronic annotation /// 0016080 // synaptic vesicle targeting // non-traceable author statement /// 0017157 // regulation of exocytosis // inferred from direct assay /// 0019933 // cAMP-mediated signaling // inferred from direct assay /// 0030073 // insulin secretion // inferred …	0005622 // intracellular // inferred from direct assay /// 0005623 // cell // inferred from direct assay /// 0030054 // cell junction // inferred from electronic annotation /// 0045202 // synapse // inferred from direct assay /// 0045202 // synapse // not recorded	0005509 // calcium ion binding // not recorded /// 0005515 // protein binding // inferred from physical interaction /// 0005522 // profilin binding // inferred from direct assay /// 0005544 // calcium-dependent phospholipid binding // not recorded /// 0016491 // oxidoreductase activity // inferred from electronic annotation /// 0046872 // metal ion binding // inferred from electronic annotation	---
1419394_s_at	0.0394794	3.40558	10.2674	9.47936	9.99407	P	P	P	8.89299	7.92164	7.25829	P	P	P	1419394_s_at	S100a8	S100 calcium binding protein A8 (calgranulin A)	NM_013650	20201	ENSMUSG00000056054	chr3	90669070	90670034	+	0002376 // immune system process // inferred from electronic annotation /// 0002523 // leukocyte migration involved in inflammatory response // not recorded /// 0002526 // acute inflammatory response // inferred from electronic annotation /// 0002544 // chronic inflammatory response // inferred from electronic annotation /// 0006914 // autophagy // not recorded /// 0006915 // apoptotic process //…	0005576 // extracellular region // inferred from electronic annotation /// 0005615 // extracellular space // not recorded /// 0005634 // nucleus // not recorded /// 0005737 // cytoplasm // inferred from electronic annotation /// 0005856 // cytoskeleton // inferred from electronic annotation /// 0005886 // plasma membrane // inferred from electronic annotation /// 0016020 // membrane // inferred f…	0005509 // calcium ion binding // inferred from electronic annotation /// 0005515 // protein binding // inferred from electronic annotation /// 0008017 // microtubule binding // inferred from electronic annotation /// 0008270 // zinc ion binding // inferred from electronic annotation /// 0016209 // antioxidant activity // inferred from electronic annotation /// 0035662 // Toll-like receptor 4 bin…	---
1419426_s_at	0.0375249	0.434388	6.20661	7.21599	6.77216	A	M	A	8.46415	7.73937	7.62245	P	P	P	1419426_s_at	Ccl21a /// Ccl21b /// Ccl21c /// Gm10591 /// Gm13304 /// Gm1987 /// Gm21541 /// LOC100041504 /// LOC100041593	chemokine (C-C motif) ligand 21A (serine) /// chemokine (C-C motif) ligand 21B (leucine) /// chemokine (C-C motif) ligand 21C (leucine) /// predicted gene 10591 /// predicted gene 13304 /// predicted gene 1987 /// predicted gene, 21541 /// c-C motif chemokine 21c-like /// c-C motif chemokine 21c-like	NM_001193666 /// NM_001193667 /// NM_001193668 /// NM_001270360 /// NM_011124 /// NM_011335 /// NM_023052 /// XM_001473258 /// XM_001473394	18829 /// 65956 /// 100041504 /// 100041593 /// 100042493 /// 100504239 /// 100504346 /// 100504362 /// 100862177	ENSMUSG00000073878 /// ENSMUSG00000094065 /// ENSMUSG00000094686 /// ENSMUSG00000096271 /// OTTMUSG00000006590 /// OTTMUSG00000011347 /// OTTMUSG00000011350	chr4	41903648	41904742	+	0001768 // establishment of T cell polarity // inferred from sequence or structural similarity /// 0001771 // immunological synapse formation // inferred from direct assay /// 0001954 // positive regulation of cell-matrix adhesion // inferred from sequence or structural similarity /// 0002407 // dendritic cell chemotaxis // inferred from direct assay /// 0002606 // positive regulation of dendriti…	0005576 // extracellular region // inferred from electronic annotation /// 0005615 // extracellular space // inferred from electronic annotation /// 0009897 // external side of plasma membrane // inferred from direct assay /// 0031012 // extracellular matrix // inferred from sequence or structural similarity	0005125 // cytokine activity // inferred from electronic annotation /// 0008009 // chemokine activity // not recorded /// 0031732 // CCR7 chemokine receptor binding // inferred from physical interaction /// 0042379 // chemokine receptor binding // not recorded	---
1419437_at	0.0420954	0.392561	7.76069	7.14569	6.90116	P	P	P	9.11289	7.93285	8.71287	P	P	P	1419437_at	Sim2	single-minded homolog 2 (Drosophila)	NM_011377 /// XM_006522966 /// XM_006522967 /// XM_006522968	20465	ENSMUSG00000062713	chr16	94084930	94127027	+	0000122 // negative regulation of transcription from RNA polymerase II promoter // inferred from genetic interaction /// 0006351 // transcription, DNA-templated // inferred from electronic annotation /// 0006355 // regulation of transcription, DNA-templated // inferred from electronic annotation /// 0007165 // signal transduction // inferred from electronic annotation /// 0007275 // multicellular…	0005634 // nucleus // inferred from direct assay /// 0005634 // nucleus // not recorded	0003677 // DNA binding // inferred from direct assay /// 0003700 // sequence-specific DNA binding transcription factor activity // inferred from electronic annotation /// 0004871 // signal transducer activity // inferred from electronic annotation /// 0005515 // protein binding // inferred from physical interaction /// 0046982 // protein heterodimerization activity // inferred from physical inter…	---
1419442_at	0.000395298	0.326365	6.94814	6.70163	7.04491	M	A	A	8.62089	8.30122	8.61748	P	P	P	1419442_at	Matn2	matrilin 2	NM_016762 /// XM_006520023	17181	ENSMUSG00000022324	chr15	34306679	34436274	+	0001764 // neuron migration // inferred from direct assay /// 0007411 // axon guidance // inferred from genetic interaction /// 0008347 // glial cell migration // inferred from direct assay /// 0031104 // dendrite regeneration // inferred from mutant phenotype /// 0031175 // neuron projection development // inferred from direct assay /// 0048678 // response to axon injury // inferred from mutant …	0005576 // extracellular region // inferred from electronic annotation /// 0005578 // proteinaceous extracellular matrix // inferred from direct assay /// 0005604 // basement membrane // inferred from direct assay /// 0031012 // extracellular matrix // not recorded	0005509 // calcium ion binding // inferred from electronic annotation /// 0005515 // protein binding // inferred from electronic annotation	---
1419446_at	0.0124583	4.36776	9.46588	8.80013	9.62421	P	P	P	7.22001	7.2793	7.13148	P	P	P	1419446_at	Tbc1d1	TBC1 domain family, member 1	NM_001289514 /// NM_019636 /// XM_006504035 /// XM_006504036 /// XM_006504037 /// XM_006504038 /// XM_006504039 /// XM_006504040	57915	ENSMUSG00000029174 /// OTTMUSG00000026476	chr5	64160307	64351477	+	0032313 // regulation of Rab GTPase activity // inferred from electronic annotation /// 0032851 // positive regulation of Rab GTPase activity // inferred from electronic annotation /// 0032880 // regulation of protein localization // not recorded /// 0043547 // positive regulation of GTPase activity // inferred from electronic annotation	0005634 // nucleus // inferred from electronic annotation /// 0005829 // cytosol // traceable author statement	0005096 // GTPase activator activity // inferred from electronic annotation /// 0005097 // Rab GTPase activator activity // inferred from electronic annotation /// 0005515 // protein binding // inferred from electronic annotation	---
1419519_at	0.0105891	0.284705	5.36727	5.32411	4.9956	M	A	A	6.53108	7.04962	7.43284	P	P	P	1419519_at	Igf1	insulin-like growth factor 1	NM_001111274 /// NM_001111275 /// NM_001111276 /// NM_010512 /// NM_184052 /// XM_006513253 /// XM_006513254 /// XM_006513255 /// XM_006513256 /// XM_006513257 /// XM_006513258 /// XM_006513259 /// XM_006513260 /// XM_006513261 /// XM_006513262 /// XM_006513263 /// XM_006513264 /// XM_006513265 /// XM_006513266	16000	ENSMUSG00000020053 /// OTTMUSG00000031391	chr10	87859489	87932278	+	0001649 // osteoblast differentiation // inferred from expression pattern /// 0001775 // cell activation // not recorded /// 0001932 // regulation of protein phosphorylation // inferred from direct assay /// 0001974 // blood vessel remodeling // inferred from genetic interaction /// 0001974 // blood vessel remodeling // inferred from mutant phenotype /// 0006417 // regulation of translation // no…	0005576 // extracellular region // inferred from electronic annotation /// 0005614 // interstitial matrix // not recorded /// 0005615 // extracellular space // inferred from direct assay /// 0005615 // extracellular space // not recorded /// 0005622 // intracellular // not recorded /// 0043025 // neuronal cell body // not recorded	0005158 // insulin receptor binding // not recorded /// 0005159 // insulin-like growth factor receptor binding // inferred from physical interaction /// 0005159 // insulin-like growth factor receptor binding // not recorded /// 0005178 // integrin binding // not recorded /// 0005179 // hormone activity // not recorded /// 0005496 // steroid binding // not recorded /// 0005515 // protein binding /…	---
1419523_at	0.00811131	4.83481	8.39802	7.3995	7.59156	P	P	P	5.30758	5.02196	6.17974	P	P	P	1419523_at	Cyp3a13	cytochrome P450, family 3, subfamily a, polypeptide 13	NM_007819	13113	ENSMUSG00000029727 /// OTTMUSG00000022877	chr5	137893966	137921622	-	0010628 // positive regulation of gene expression // inferred from mutant phenotype /// 0055114 // oxidation-reduction process // inferred from electronic annotation	0005783 // endoplasmic reticulum // inferred from electronic annotation /// 0005789 // endoplasmic reticulum membrane // inferred from electronic annotation /// 0016020 // membrane // inferred from electronic annotation /// 0031090 // organelle membrane // inferred from electronic annotation /// 0043231 // intracellular membrane-bounded organelle // inferred from electronic annotation	0004497 // monooxygenase activity // inferred from electronic annotation /// 0005506 // iron ion binding // inferred from electronic annotation /// 0009055 // electron carrier activity // inferred from electronic annotation /// 0016491 // oxidoreductase activity // inferred from electronic annotation /// 0016705 // oxidoreductase activity, acting on paired donors, with incorporation or reduction …	---
1419525_at	0.00379111	0.291558	5.06828	5.24477	5.59182	A	A	P	6.67617	7.09444	7.42305	P	P	P	1419525_at	Car5a	carbonic anhydrase 5a, mitochondrial	NM_007608	12352	ENSMUSG00000025317 /// OTTMUSG00000031066	chr8	121916145	121944912	-	0006094 // gluconeogenesis // traceable author statement /// 0006730 // one-carbon metabolic process // inferred from electronic annotation	0005739 // mitochondrion // inferred from direct assay /// 0005739 // mitochondrion // not recorded	0004089 // carbonate dehydratase activity // inferred from direct assay /// 0004089 // carbonate dehydratase activity // not recorded /// 0008270 // zinc ion binding // inferred from electronic annotation /// 0016829 // lyase activity // inferred from electronic annotation /// 0046872 // metal ion binding // inferred from electronic annotation	---
1419532_at	0.00878626	10.4345	8.43344	7.9159	9.08938	P	P	P	5.97822	4.12112	4.80936	P	A	A	1419532_at	Il1r2	interleukin 1 receptor, type II	NM_010555 /// XM_006495724 /// XM_006495725 /// XM_006495726	16178	ENSMUSG00000026073	chr1	40084749	40125223	+	0019221 // cytokine-mediated signaling pathway // inferred from electronic annotation	0005576 // extracellular region // inferred from electronic annotation /// 0005886 // plasma membrane // inferred from electronic annotation /// 0016020 // membrane // inferred from electronic annotation /// 0016021 // integral component of membrane // inferred from electronic annotation	0004908 // interleukin-1 receptor activity // inferred from electronic annotation /// 0004910 // interleukin-1, Type II, blocking receptor activity // inferred from electronic annotation /// 0005515 // protein binding // inferred from electronic annotation	---
1419536_a_at	0.0499154	2.54075	11.4639	11.0892	12.1592	P	P	P	10.2357	10.2182	10.4226	P	P	P	1419536_a_at	Rela	v-rel reticuloendotheliosis viral oncogene homolog A (avian)	NM_009045 /// XM_006531694 /// XM_006531695	19697	ENSMUSG00000024927 /// OTTMUSG00000016639	chr19	5637774	5648131	+	0001889 // liver development // inferred from mutant phenotype /// 0001942 // hair follicle development // inferred from mutant phenotype /// 0006117 // acetaldehyde metabolic process // inferred from electronic annotation /// 0006351 // transcription, DNA-templated // inferred from electronic annotation /// 0006355 // regulation of transcription, DNA-templated // inferred from electronic annotat…	0005634 // nucleus // inferred from direct assay /// 0005634 // nucleus // not recorded /// 0005667 // transcription factor complex // not recorded /// 0005737 // cytoplasm // inferred from direct assay /// 0005737 // cytoplasm // not recorded /// 0005829 // cytosol // inferred from direct assay /// 0005829 // cytosol // not recorded /// 0043234 // protein complex // not recorded /// 0071159 // N…	0003677 // DNA binding // inferred from direct assay /// 0003677 // DNA binding // not recorded /// 0003682 // chromatin binding // inferred from direct assay /// 0003682 // chromatin binding // not recorded /// 0003700 // sequence-specific DNA binding transcription factor activity // inferred from direct assay /// 0003700 // sequence-specific DNA binding transcription factor activity // not reco…	Apoptosis // GenMAPP /// Apoptosis_GenMAPP // GenMAPP
1419547_at	0.00427179	0.48742	10.0645	10.0709	9.66875	P	P	P	10.8515	11.1946	10.8781	P	P	P	1419547_at	Fahd1	fumarylacetoacetate hydrolase domain containing 1	NM_023480	68636	ENSMUSG00000045316	chr17	24848891	24850339	-	0008152 // metabolic process // inferred from electronic annotation	0005634 // nucleus // not recorded /// 0005737 // cytoplasm // not recorded /// 0005739 // mitochondrion // inferred from direct assay /// 0005739 // mitochondrion // not recorded /// 0005743 // mitochondrial inner membrane // inferred from direct assay /// 0005829 // cytosol // not recorded	0003824 // catalytic activity // inferred from electronic annotation /// 0016787 // hydrolase activity // inferred from electronic annotation /// 0018773 // acetylpyruvate hydrolase activity // not recorded /// 0034545 // fumarylpyruvate hydrolase activity // not recorded /// 0046872 // metal ion binding // inferred from electronic annotation /// 0047621 // acylpyruvate hydrolase activity // infe…	---
1419579_at	0.042562	0.16516	4.35408	6.2963	6.72422	M	P	P	9.22312	8.60244	7.98593	P	P	P	1419579_at	Slc7a12	solute carrier family 7 (cationic amino acid transporter, y+ system), member 12	NM_080852 /// XM_006530052	140918	ENSMUSG00000039710 /// OTTMUSG00000026423	chr3	14480698	14505807	+	0003333 // amino acid transmembrane transport // inferred from direct assay /// 0006810 // transport // inferred from electronic annotation /// 0006865 // amino acid transport // inferred from direct assay /// 0055085 // transmembrane transport // inferred from electronic annotation	0005737 // cytoplasm // inferred from direct assay /// 0005886 // plasma membrane // inferred from direct assay /// 0016020 // membrane // inferred from electronic annotation /// 0016021 // integral component of membrane // inferred from electronic annotation	0015171 // amino acid transmembrane transporter activity // inferred from direct assay	---
1419588_at	0.0129957	0.287697	5.73852	6.25583	5.42176	P	P	M	7.60094	7.01834	8.11071	P	P	P	1419588_at	Spag1	sperm associated antigen 1	NM_012031 /// XM_006520072 /// XM_006520073 /// XM_006520074 /// XM_006520075 /// XM_006520076 /// XM_006520077 /// XM_006520078 /// XM_006520079 /// XM_006520080 /// XR_383831	26942	ENSMUSG00000037617	chr15	36179367	36235654	+	0007338 // single fertilization // inferred from electronic annotation /// 0008152 // metabolic process // inferred from electronic annotation /// 0070286 // axonemal dynein complex assembly // inferred from sequence or structural similarity	0005634 // nucleus // not recorded /// 0005737 // cytoplasm // not recorded /// 0015630 // microtubule cytoskeleton // not recorded	0000166 // nucleotide binding // inferred from electronic annotation /// 0005515 // protein binding // inferred from electronic annotation /// 0005525 // GTP binding // inferred from electronic annotation /// 0016787 // hydrolase activity // inferred from electronic annotation	---
1419601_at	0.00350865	0.360746	8.62962	8.84827	8.29257	P	P	P	10.0602	9.92594	10.234	P	P	P	1419601_at	Kcnj10	potassium inwardly-rectifying channel, subfamily J, member 10	NM_001039484 /// NM_020269 /// XM_006496677	16513	ENSMUSG00000044708	chr1	172341209	172374085	+	0006810 // transport // inferred from electronic annotation /// 0006811 // ion transport // inferred from electronic annotation /// 0006813 // potassium ion transport // inferred from direct assay /// 0006954 // inflammatory response // inferred from electronic annotation /// 0007601 // visual perception // inferred from mutant phenotype /// 0007628 // adult walking behavior // inferred from muta…	0005886 // plasma membrane // inferred from direct assay /// 0005887 // integral component of plasma membrane // inferred by curator /// 0005902 // microvillus // not recorded /// 0016010 // dystrophin-associated glycoprotein complex // not recorded /// 0016020 // membrane // inferred from electronic annotation /// 0016021 // integral component of membrane // inferred from electronic annotation /…	0000166 // nucleotide binding // inferred from electronic annotation /// 0005102 // receptor binding // not recorded /// 0005242 // inward rectifier potassium channel activity // inferred from mutant phenotype /// 0005242 // inward rectifier potassium channel activity // not recorded /// 0005244 // voltage-gated ion channel activity // inferred from electronic annotation /// 0005267 // potassium …	---
1419602_at	0.00389255	0.415175	5.63109	5.42289	5.30632	P	M	P	6.76577	6.69019	6.7269	P	P	P	1419602_at	Hoxa2	homeobox A2	NM_010451	15399	ENSMUSG00000014704 /// OTTMUSG00000037358	chr6	52162350	52164831	-	0000122 // negative regulation of transcription from RNA polymerase II promoter // inferred from direct assay /// 0001709 // cell fate determination // inferred from mutant phenotype /// 0002076 // osteoblast development // inferred from genetic interaction /// 0006351 // transcription, DNA-templated // inferred from electronic annotation /// 0006355 // regulation of transcription, DNA-templated …	0005634 // nucleus // inferred from direct assay /// 0005634 // nucleus // not recorded	0003677 // DNA binding // inferred from electronic annotation /// 0003700 // sequence-specific DNA binding transcription factor activity // inferred from electronic annotation /// 0043565 // sequence-specific DNA binding // inferred from direct assay	---
1419605_at	0.0436861	0.484891	5.86085	5.31159	4.95274	A	A	A	5.99169	6.44693	6.84236	P	P	P	1419605_at	Clec10a	C-type lectin domain family 10, member A	NM_001204252 /// NM_010796	17312	ENSMUSG00000000318 /// OTTMUSG00000006033	chr11	70166667	70170833	+	---	0016020 // membrane // inferred from electronic annotation /// 0016021 // integral component of membrane // inferred from electronic annotation	0030246 // carbohydrate binding // inferred from electronic annotation	---
1419609_at	0.0313856	4.34117	8.44955	8.12313	7.33426	P	P	P	6.3326	6.23303	4.70679	P	P	A	1419609_at	Ccr1	chemokine (C-C motif) receptor 1	NM_009912	12768	ENSMUSG00000025804	chr9	123962123	123968692	-	0006816 // calcium ion transport // not recorded /// 0006874 // cellular calcium ion homeostasis // not recorded /// 0006887 // exocytosis // not recorded /// 0006935 // chemotaxis // inferred from electronic annotation /// 0006954 // inflammatory response // inferred from mutant phenotype /// 0006955 // immune response // not recorded /// 0007165 // signal transduction // inferred from electroni…	0005886 // plasma membrane // not recorded /// 0009897 // external side of plasma membrane // not recorded /// 0016020 // membrane // inferred from electronic annotation /// 0016021 // integral component of membrane // inferred from electronic annotation /// 0043025 // neuronal cell body // not recorded	0004435 // phosphatidylinositol phospholipase C activity // not recorded /// 0004871 // signal transducer activity // inferred from electronic annotation /// 0004930 // G-protein coupled receptor activity // inferred from electronic annotation /// 0004950 // chemokine receptor activity // not recorded /// 0005515 // protein binding // inferred from physical interaction /// 0016493 // C-C chemokin…	GPCRDB_Class_A_Rhodopsin-like // GenMAPP /// Peptide_GPCRs // GenMAPP
1419641_at	0.00262148	2.41189	10.7951	10.58	10.9683	P	P	P	9.61372	9.50371	9.43592	P	P	P	1419641_at	Purb	purine rich element binding protein B	NM_011221	19291	ENSMUSG00000094483 /// OTTMUSG00000005110	chr11	6469480	6475917	-	0006268 // DNA unwinding involved in DNA replication // inferred from sequence or structural similarity /// 0006351 // transcription, DNA-templated // inferred from electronic annotation /// 0006355 // regulation of transcription, DNA-templated // inferred from electronic annotation /// 0006915 // apoptotic process // non-traceable author statement /// 0008283 // cell proliferation // non-traceab…	0005634 // nucleus // inferred from direct assay /// 0005634 // nucleus // not recorded /// 0005662 // DNA replication factor A complex // inferred from direct assay	0000900 // translation repressor activity, nucleic acid binding // not recorded /// 0003677 // DNA binding // inferred from electronic annotation /// 0003690 // double-stranded DNA binding // inferred from direct assay /// 0003691 // double-stranded telomeric DNA binding // inferred from sequence or structural similarity /// 0003697 // single-stranded DNA binding // inferred from direct assay ///…	---
1419651_at	0.0238375	2.24746	8.19505	7.78929	7.33263	P	P	P	6.96524	6.53452	6.37311	P	P	P	1419651_at	Nkain1	Na+/K+ transporting ATPase interacting 1	NM_025998 /// XM_006539114 /// XM_006539115 /// XM_006539116 /// XM_006539117	67149	---	chr4	130530129	130574173	-	---	0005886 // plasma membrane // inferred from electronic annotation /// 0016020 // membrane // inferred from electronic annotation /// 0016021 // integral component of membrane // inferred from electronic annotation	---	---
1419656_at	0.00032785	0.384806	8.5049	8.50806	8.27282	P	P	P	9.77478	9.97017	9.67041	P	P	P	1419656_at	Slc25a36	solute carrier family 25, member 36	NM_138756 /// XM_006510870 /// XM_006510871 /// XM_006510872 /// XR_379398 /// XR_379399 /// XR_379400 /// XR_379401 /// XR_379402 /// XR_379403 /// XR_379404	192287	ENSMUSG00000032449 /// OTTMUSG00000031601	chr9	97075289	97111151	-	0006810 // transport // inferred from electronic annotation /// 0032355 // response to estradiol // not recorded /// 0055085 // transmembrane transport // inferred from electronic annotation	0005739 // mitochondrion // inferred from direct assay /// 0005743 // mitochondrial inner membrane // inferred from electronic annotation /// 0016020 // membrane // inferred from electronic annotation /// 0016021 // integral component of membrane // inferred from electronic annotation	---	---
1419662_at	0.00825617	0.13638	5.62521	5.95917	6.97187	P	P	P	9.53838	8.20684	9.45011	P	P	P	1419662_at	Ogn	osteoglycin	NM_008760	18295	ENSMUSG00000021390	chr13	49607989	49624504	+	---	0005576 // extracellular region // inferred from electronic annotation /// 0005578 // proteinaceous extracellular matrix // inferred from electronic annotation /// 0005615 // extracellular space // not recorded /// 0031012 // extracellular matrix // not recorded	0005515 // protein binding // inferred from electronic annotation /// 0008083 // growth factor activity // inferred from electronic annotation	---
1419663_at	0.0185286	0.148592	6.59164	6.75596	8.39959	P	P	P	10.6728	9.45354	10.3614	P	P	P	1419663_at	Ogn	osteoglycin	NM_008760	18295	ENSMUSG00000021390	chr13	49607989	49624504	+	---	0005576 // extracellular region // inferred from electronic annotation /// 0005578 // proteinaceous extracellular matrix // inferred from electronic annotation /// 0005615 // extracellular space // not recorded /// 0031012 // extracellular matrix // not recorded	0005515 // protein binding // inferred from electronic annotation /// 0008083 // growth factor activity // inferred from electronic annotation	---
1419664_at	0.0133935	0.463569	8.08519	8.10631	8.17606	P	P	P	8.97428	9.45992	9.22162	P	P	P	1419664_at	Srr	serine racemase	NM_001163311 /// NM_013761 /// XM_006533457 /// XM_006533458	27364	ENSMUSG00000001323 /// OTTMUSG00000006189	chr11	74908168	74925753	-	0006520 // cellular amino acid metabolic process // inferred from electronic annotation /// 0006563 // L-serine metabolic process // inferred from direct assay /// 0006563 // L-serine metabolic process // not recorded /// 0007420 // brain development // inferred from electronic annotation /// 0007568 // aging // inferred from electronic annotation /// 0008152 // metabolic process // inferred from…	0005737 // cytoplasm // not recorded /// 0005886 // plasma membrane // not recorded /// 0043025 // neuronal cell body // not recorded /// 0045177 // apical part of cell // not recorded	0000166 // nucleotide binding // inferred from electronic annotation /// 0000287 // magnesium ion binding // not recorded /// 0003824 // catalytic activity // inferred from electronic annotation /// 0003941 // L-serine ammonia-lyase activity // not recorded /// 0005509 // calcium ion binding // inferred from direct assay /// 0005515 // protein binding // inferred from physical interaction /// 000…	---
1419695_at	0.00396927	0.374198	6.5928	6.86693	6.47778	P	P	P	7.88672	8.39653	7.87283	P	P	P	1419695_at	St8sia1	ST8 alpha-N-acetyl-neuraminide alpha-2,8-sialyltransferase 1	NM_011374 /// XM_006506928 /// XM_006506929 /// XM_006506930	20449	ENSMUSG00000030283 /// OTTMUSG00000022470	chr6	142828101	142964451	-	0006486 // protein glycosylation // not recorded /// 0006629 // lipid metabolic process // inferred from electronic annotation /// 0006665 // sphingolipid metabolic process // inferred from electronic annotation /// 0008284 // positive regulation of cell proliferation // inferred from direct assay /// 0034605 // cellular response to heat // inferred from direct assay /// 0097503 // sialylation //…	0000139 // Golgi membrane // inferred from electronic annotation /// 0005794 // Golgi apparatus // inferred from electronic annotation /// 0016020 // membrane // inferred from electronic annotation /// 0016021 // integral component of membrane // inferred from electronic annotation /// 0030173 // integral component of Golgi membrane // inferred from electronic annotation	0003828 // alpha-N-acetylneuraminate alpha-2,8-sialyltransferase activity // inferred from electronic annotation /// 0008373 // sialyltransferase activity // not recorded /// 0016740 // transferase activity // inferred from electronic annotation /// 0016757 // transferase activity, transferring glycosyl groups // inferred from electronic annotation	---
1419706_a_at	0.0101612	12.576	13.7082	13.4279	12.0532	P	P	P	9.95238	9.16216	9.48137	P	P	P	1419706_a_at	Akap12	A kinase (PRKA) anchor protein (gravin) 12	NM_031185	83397	ENSMUSG00000038587	chr10	4266334	4359471	+	0006605 // protein targeting // inferred from electronic annotation /// 0007165 // signal transduction // not recorded /// 0007165 // signal transduction // traceable author statement /// 0010739 // positive regulation of protein kinase A signaling // not recorded /// 0016310 // phosphorylation // inferred from electronic annotation /// 0030819 // positive regulation of cAMP biosynthetic process …	0005737 // cytoplasm // inferred from electronic annotation /// 0005856 // cytoskeleton // inferred from electronic annotation /// 0005886 // plasma membrane // inferred from electronic annotation	0005515 // protein binding // inferred from electronic annotation /// 0008179 // adenylate cyclase binding // not recorded /// 0016301 // kinase activity // inferred from electronic annotation /// 0016740 // transferase activity // inferred from electronic annotation /// 0030159 // receptor signaling complex scaffold activity // traceable author statement /// 0051018 // protein kinase A binding /…	G_Protein_Signaling // GenMAPP
1419717_at	0.0127782	2.71445	8.61951	8.26554	7.90357	P	P	P	6.39441	7.27912	6.74189	P	P	P	1419717_at	Sema3e	sema domain, immunoglobulin domain (Ig), short basic domain, secreted, (semaphorin) 3E	NM_011348	20349	ENSMUSG00000063531 /// OTTMUSG00000029684	chr5	14025316	14254316	+	0001525 // angiogenesis // inferred from electronic annotation /// 0001569 // patterning of blood vessels // inferred from mutant phenotype /// 0001953 // negative regulation of cell-matrix adhesion // inferred from mutant phenotype /// 0002040 // sprouting angiogenesis // inferred from mutant phenotype /// 0007275 // multicellular organismal development // inferred from electronic annotation ///…	0005576 // extracellular region // non-traceable author statement /// 0016020 // membrane // inferred from electronic annotation	0004872 // receptor activity // inferred from electronic annotation /// 0005515 // protein binding // inferred from physical interaction /// 0030215 // semaphorin receptor binding // inferred from physical interaction	---
1419758_at	0.0330353	3.05997	8.71841	7.47639	7.82022	P	P	P	6.53728	6.77867	6.06685	P	P	P	1419758_at	Abcb1a	ATP-binding cassette, sub-family B (MDR/TAP), member 1A	NM_011076 /// XM_006503555 /// XM_006503556	18671	ENSMUSG00000040584 /// OTTMUSG00000029053	chr5	8660091	8748570	+	0000086 // G2/M transition of mitotic cell cycle // not recorded /// 0001666 // response to hypoxia // inferred from electronic annotation /// 0006200 // ATP catabolic process // not recorded /// 0006810 // transport // inferred from electronic annotation /// 0006855 // drug transmembrane transport // not recorded /// 0007595 // lactation // inferred from electronic annotation /// 0007623 // circ…	0000139 // Golgi membrane // --- /// 0005886 // plasma membrane // inferred from electronic annotation /// 0009986 // cell surface // not recorded /// 0016020 // membrane // inferred from electronic annotation /// 0016021 // integral component of membrane // not recorded /// 0016324 // apical plasma membrane // --- /// 0046581 // intercellular canaliculus // inferred from direct assay /// 0070062…	0000166 // nucleotide binding // inferred from electronic annotation /// 0005515 // protein binding // inferred from electronic annotation /// 0005524 // ATP binding // inferred from electronic annotation /// 0008559 // xenobiotic-transporting ATPase activity // inferred from electronic annotation /// 0016787 // hydrolase activity // inferred from electronic annotation /// 0016887 // ATPase activ…	---
1419759_at	0.00663149	2.47465	8.86534	8.408	8.70236	P	P	P	7.637	6.98349	7.3962	P	P	P	1419759_at	Abcb1a	ATP-binding cassette, sub-family B (MDR/TAP), member 1A	NM_011076 /// XM_006503555 /// XM_006503556	18671	ENSMUSG00000040584 /// OTTMUSG00000029053	chr5	8660091	8748570	+	0000086 // G2/M transition of mitotic cell cycle // not recorded /// 0001666 // response to hypoxia // inferred from electronic annotation /// 0006200 // ATP catabolic process // not recorded /// 0006810 // transport // inferred from electronic annotation /// 0006855 // drug transmembrane transport // not recorded /// 0007595 // lactation // inferred from electronic annotation /// 0007623 // circ…	0000139 // Golgi membrane // --- /// 0005886 // plasma membrane // inferred from electronic annotation /// 0009986 // cell surface // not recorded /// 0016020 // membrane // inferred from electronic annotation /// 0016021 // integral component of membrane // not recorded /// 0016324 // apical plasma membrane // --- /// 0046581 // intercellular canaliculus // inferred from direct assay /// 0070062…	0000166 // nucleotide binding // inferred from electronic annotation /// 0005515 // protein binding // inferred from electronic annotation /// 0005524 // ATP binding // inferred from electronic annotation /// 0008559 // xenobiotic-transporting ATPase activity // inferred from electronic annotation /// 0016787 // hydrolase activity // inferred from electronic annotation /// 0016887 // ATPase activ…	---
1419764_at	0.00264246	15.4117	9.75525	10.0184	8.64109	P	P	P	5.67045	6.02586	5.05269	A	A	A	1419764_at	Chil3	chitinase-like 3	NM_009892 /// XM_006500964	12655	ENSMUSG00000040809 /// OTTMUSG00000023699	chr3	106147554	106167533	-	0000272 // polysaccharide catabolic process // inferred from electronic annotation /// 0005975 // carbohydrate metabolic process // inferred from electronic annotation /// 0006032 // chitin catabolic process // inferred from electronic annotation /// 0006954 // inflammatory response // traceable author statement /// 0008152 // metabolic process // inferred from electronic annotation	0005576 // extracellular region // inferred from electronic annotation /// 0005634 // nucleus // inferred from electronic annotation /// 0005635 // nuclear envelope // inferred from electronic annotation /// 0005737 // cytoplasm // inferred from direct assay /// 0005783 // endoplasmic reticulum // inferred from electronic annotation /// 0016023 // cytoplasmic membrane-bounded vesicle // inferred …	0003824 // catalytic activity // inferred from electronic annotation /// 0004553 // hydrolase activity, hydrolyzing O-glycosyl compounds // inferred from electronic annotation /// 0004563 // beta-N-acetylhexosaminidase activity // inferred from direct assay /// 0004568 // chitinase activity // inferred from direct assay /// 0008061 // chitin binding // inferred from electronic annotation /// 0016…	---
1419798_at	0.0176886	3.74791	6.54691	6.40935	5.38374	P	P	P	4.32624	4.64882	3.76765	M	M	A	1419798_at	2610019E17Rik /// Rab26os	--- /// RAB26, member RAS oncogene family, opposite strand	NR_045289	75614	ENSMUSG00000093565 /// OTTMUSG00000041992	chr17	24528266	24528743	+	---	---	---	---
1419835_s_at	0.00779762	2.52732	11.4863	11.1546	10.8716	P	P	P	9.91835	9.68189	9.95053	P	P	P	1419835_s_at	Plec	plectin	NM_001163540 /// NM_001163542 /// NM_001163549 /// NM_001164203 /// NM_011117 /// NM_201385 /// NM_201386 /// NM_201387 /// NM_201388 /// NM_201389 /// NM_201390 /// NM_201391 /// NM_201392 /// NM_201393 /// NM_201394 /// NR_028117	18810	ENSMUSG00000022565 /// OTTMUSG00000035240	chr15	76170973	76171325	-	0007584 // response to nutrient // not recorded /// 0031581 // hemidesmosome assembly // not recorded /// 0046417 // chorismate metabolic process // inferred from electronic annotation	0005737 // cytoplasm // not recorded /// 0005856 // cytoskeleton // inferred from electronic annotation /// 0005925 // focal adhesion // not recorded /// 0009925 // basal plasma membrane // not recorded /// 0016324 // apical plasma membrane // not recorded /// 0016528 // sarcoplasm // not recorded /// 0030054 // cell junction // inferred from electronic annotation /// 0030056 // hemidesmosome // …	0003779 // actin binding // inferred from electronic annotation /// 0005200 // structural constituent of cytoskeleton // not recorded /// 0005515 // protein binding // inferred from physical interaction /// 0008092 // cytoskeletal protein binding // not recorded /// 0008307 // structural constituent of muscle // not recorded /// 0030506 // ankyrin binding // not recorded /// 0044822 // poly(A) RN…	---
1419872_at	0.0248781	0.44677	10.2984	10.8637	11.0671	P	P	P	12.0041	11.7744	12.0297	P	P	P	1419872_at	Csf1r	colony stimulating factor 1 receptor	NM_001037859 /// NM_007779 /// XM_006525583 /// XM_006525584 /// XM_006525585 /// XM_006525586 /// XM_006525587	12978	ENSMUSG00000024621 /// OTTMUSG00000014918	chr18	61130710	61131133	+	0001934 // positive regulation of protein phosphorylation // not recorded /// 0002376 // immune system process // inferred from electronic annotation /// 0006468 // protein phosphorylation // inferred from electronic annotation /// 0006954 // inflammatory response // inferred from electronic annotation /// 0007169 // transmembrane receptor protein tyrosine kinase signaling pathway // inferred fro…	0005622 // intracellular // inferred from mutant phenotype /// 0005886 // plasma membrane // inferred from direct assay /// 0009986 // cell surface // inferred from direct assay /// 0016020 // membrane // inferred from electronic annotation /// 0016021 // integral component of membrane // inferred from electronic annotation /// 0043235 // receptor complex // inferred from direct assay	0000166 // nucleotide binding // inferred from electronic annotation /// 0004672 // protein kinase activity // inferred from electronic annotation /// 0004713 // protein tyrosine kinase activity // inferred from electronic annotation /// 0004714 // transmembrane receptor protein tyrosine kinase activity // inferred from electronic annotation /// 0005011 // macrophage colony-stimulating factor rec…	---
1419874_x_at	0.0353054	4.4935	9.55803	9.44616	10.9654	P	P	P	8.42682	7.63043	7.81815	P	P	P	1419874_x_at	Zbtb16	zinc finger and BTB domain containing 16	NM_001033324 /// XM_006510258	235320	ENSMUSG00000066687	chr9	48651796	48665328	-	0001501 // skeletal system development // inferred from mutant phenotype /// 0001823 // mesonephros development // inferred from direct assay /// 0006355 // regulation of transcription, DNA-templated // inferred from mutant phenotype /// 0007417 // central nervous system development // inferred from direct assay /// 0008285 // negative regulation of cell proliferation // inferred from mutant phen…	0005634 // nucleus // inferred from direct assay /// 0005634 // nucleus // not recorded /// 0005829 // cytosol // not recorded /// 0005886 // plasma membrane // not recorded /// 0016604 // nuclear body // not recorded /// 0016605 // PML body // not recorded /// 0016607 // nuclear speck // not recorded /// 0016607 // nuclear speck // inferred from sequence or structural similarity /// 0017053 // t…	0003676 // nucleic acid binding // inferred from electronic annotation /// 0003677 // DNA binding // not recorded /// 0003690 // double-stranded DNA binding // not recorded /// 0003700 // sequence-specific DNA binding transcription factor activity // not recorded /// 0005515 // protein binding // inferred from physical interaction /// 0008022 // protein C-terminus binding // not recorded /// 0019…	---
1419905_s_at	0.000549471	0.224251	7.58178	7.42337	7.61643	P	P	P	9.86612	9.46629	9.73847	P	P	P	1419905_s_at	Hpgd	hydroxyprostaglandin dehydrogenase 15 (NAD)	NM_008278	15446	ENSMUSG00000031613	chr8	56320351	56321043	+	0006629 // lipid metabolic process // inferred from electronic annotation /// 0006631 // fatty acid metabolic process // inferred from electronic annotation /// 0006693 // prostaglandin metabolic process // not recorded /// 0007179 // transforming growth factor beta receptor signaling pathway // not recorded /// 0007186 // G-protein coupled receptor signaling pathway // not recorded /// 0007565 /…	0005634 // nucleus // inferred from electronic annotation /// 0005737 // cytoplasm // inferred from electronic annotation /// 0016323 // basolateral plasma membrane // inferred from direct assay /// 0070062 // extracellular vesicular exosome // not recorded	0003824 // catalytic activity // not recorded /// 0004957 // prostaglandin E receptor activity // not recorded /// 0016404 // 15-hydroxyprostaglandin dehydrogenase (NAD+) activity // inferred from direct assay /// 0016404 // 15-hydroxyprostaglandin dehydrogenase (NAD+) activity // not recorded /// 0016491 // oxidoreductase activity // inferred from electronic annotation /// 0050662 // coenzyme bi…	Prostaglandin_synthesis_regulation // GenMAPP
1419906_at	0.000147869	0.174725	4.15335	4.5131	4.56814	A	A	A	7.04744	7.05329	6.68925	P	P	P	1419906_at	Hpgd	hydroxyprostaglandin dehydrogenase 15 (NAD)	NM_008278	15446	---	chr8	56320351	56321043	-	0006629 // lipid metabolic process // inferred from electronic annotation /// 0006631 // fatty acid metabolic process // inferred from electronic annotation /// 0006693 // prostaglandin metabolic process // not recorded /// 0007179 // transforming growth factor beta receptor signaling pathway // not recorded /// 0007186 // G-protein coupled receptor signaling pathway // not recorded /// 0007565 /…	0005737 // cytoplasm // inferred from electronic annotation /// 0016323 // basolateral plasma membrane // inferred from direct assay /// 0070062 // extracellular vesicular exosome // not recorded	0003824 // catalytic activity // not recorded /// 0004957 // prostaglandin E receptor activity // not recorded /// 0016404 // 15-hydroxyprostaglandin dehydrogenase (NAD+) activity // inferred from direct assay /// 0016404 // 15-hydroxyprostaglandin dehydrogenase (NAD+) activity // not recorded /// 0016491 // oxidoreductase activity // inferred from electronic annotation /// 0051287 // NAD binding…	---
1419915_at	0.0142253	0.464082	9.07048	9.65425	9.71553	P	P	P	10.3554	10.8626	10.5834	P	P	P	1419915_at	Nus1	nuclear undecaprenyl pyrophosphate synthase 1 homolog (S. cerevisiae)	NM_030250	52014	---	chr10	52438546	52439205	-	0001525 // angiogenesis // inferred from electronic annotation /// 0007275 // multicellular organismal development // inferred from electronic annotation /// 0030154 // cell differentiation // inferred from electronic annotation /// 0032367 // intracellular cholesterol transport // inferred from mutant phenotype /// 0032367 // intracellular cholesterol transport // not recorded /// 0055092 // ste…	0005622 // intracellular // inferred from mutant phenotype /// 0005623 // cell // inferred from mutant phenotype /// 0005783 // endoplasmic reticulum // inferred from electronic annotation /// 0005789 // endoplasmic reticulum membrane // not recorded /// 0016020 // membrane // inferred from electronic annotation /// 0016021 // integral component of membrane // inferred from electronic annotation	0016765 // transferase activity, transferring alkyl or aryl (other than methyl) groups // inferred from electronic annotation	---
1419942_at	0.00288535	3.92996	9.42668	9.34837	9.01629	P	P	P	7.0048	7.11187	7.68646	A	A	A	1419942_at	Srxn1	sulfiredoxin 1 homolog (S. cerevisiae)	NM_029688	76650	---	chr2	152110591	152111192	-	0006979 // response to oxidative stress // inferred from direct assay /// 0006979 // response to oxidative stress // not recorded /// 0055114 // oxidation-reduction process // not recorded	0005737 // cytoplasm // inferred from electronic annotation /// 0005829 // cytosol // not recorded /// 0005829 // cytosol // inferred from sequence or structural similarity	0000166 // nucleotide binding // inferred from electronic annotation /// 0005524 // ATP binding // inferred from electronic annotation /// 0016209 // antioxidant activity // inferred from electronic annotation /// 0016491 // oxidoreductase activity // inferred from electronic annotation /// 0016667 // oxidoreductase activity, acting on a sulfur group of donors // inferred from direct assay /// 00…	---
1420024_s_at	0.0386196	2.27868	11.061	10.9073	11.5405	P	P	P	10.1116	9.33505	10.3831	P	P	P	1420024_s_at	Etf1	eukaryotic translation termination factor 1	NM_144866 /// XM_006525859 /// XM_006525860	225363	ENSMUSG00000024360 /// OTTMUSG00000042433	chr18	34904139	34904681	-	0000184 // nuclear-transcribed mRNA catabolic process, nonsense-mediated decay // inferred from electronic annotation /// 0006412 // translation // inferred from electronic annotation /// 0006415 // translational termination // not recorded /// 0006479 // protein methylation // not recorded /// 0016032 // viral process // inferred from electronic annotation /// 0019048 // modulation by virus of h…	0005737 // cytoplasm // inferred from electronic annotation	0003747 // translation release factor activity // not recorded /// 0005515 // protein binding // inferred from electronic annotation /// 0016149 // translation release factor activity, codon specific // inferred from electronic annotation /// 0044822 // poly(A) RNA binding // not recorded	Translation_Factors // GenMAPP
1420150_at	0.00917561	6.57736	9.05963	8.87198	10.2317	P	P	P	6.15777	7.26124	6.7861	P	P	P	1420150_at	Spsb1	splA/ryanodine receptor domain and SOCS box containing 1	NM_029035 /// XM_006537089 /// XM_006539234	74646	ENSMUSG00000039911 /// OTTMUSG00000010263	chr4	149896285	149896638	-	0016567 // protein ubiquitination // inferred from electronic annotation /// 0035556 // intracellular signal transduction // inferred from electronic annotation	0005737 // cytoplasm // inferred from electronic annotation	0005515 // protein binding // inferred from electronic annotation	---
1420178_at	0.0467155	2.26537	6.14012	6.45687	6.44858	P	M	P	5.10468	4.56883	5.65316	A	A	A	1420178_at	---	---	---	---	---	chr11	100935979	100936300	+	---	---	---	---
1420191_s_at	0.0163512	0.453262	5.33975	5.59973	6.08258	P	P	P	6.6372	6.80435	7.07195	P	P	P	1420191_s_at	Tmem191c	transmembrane protein 191C	NM_177473 /// XM_006522031 /// XM_006522032 /// XM_006522033 /// XR_384547	224019	ENSMUSG00000055692 /// OTTMUSG00000028710	chr16	17278362	17278660	+	---	0016020 // membrane // inferred from electronic annotation /// 0016021 // integral component of membrane // inferred from electronic annotation	---	---
1420352_at	0.00139636	4.21004	7.97085	7.35391	7.894	P	P	P	5.36656	5.7192	5.93095	A	M	A	1420352_at	Prss22	protease, serine 22	NM_133731 /// XM_006524905 /// XM_006524906	70835	ENSMUSG00000045027	chr17	23993534	23998098	-	0006508 // proteolysis // inferred from electronic annotation	---	0003824 // catalytic activity // inferred from electronic annotation /// 0004252 // serine-type endopeptidase activity // inferred from electronic annotation /// 0008233 // peptidase activity // inferred from electronic annotation /// 0008236 // serine-type peptidase activity // inferred from electronic annotation /// 0016787 // hydrolase activity // inferred from electronic annotation	---
1420357_s_at	0.00657855	0.233014	6.5922	5.72393	6.67762	P	A	P	8.83908	8.14249	8.40801	P	P	P	1420357_s_at	Xlr3a /// Xlr3b /// Xlr3c	X-linked lymphocyte-regulated 3A /// X-linked lymphocyte-regulated 3B /// X-linked lymphocyte-regulated 3C	NM_001081643 /// NM_001110784 /// NM_011726 /// NM_011727 /// XM_006527942 /// XM_006527943 /// XM_006527944 /// XM_006527945 /// XM_006527946 /// XM_006527947 /// XM_006528201 /// XM_006528202 /// XM_006528203 /// XM_006528204 /// XM_006529030 /// XM_006529031 /// XM_006529032 /// XM_006534661 /// XM_006534662 /// XM_006534663	22445 /// 22446 /// 574437	ENSMUSG00000057836 /// ENSMUSG00000058147 /// ENSMUSG00000073125 /// OTTMUSG00000017650 /// OTTMUSG00000017651 /// OTTMUSG00000017657	chrX	74696023	74704908	+	0051965 // positive regulation of synapse assembly // inferred from mutant phenotype /// 0061003 // positive regulation of dendritic spine morphogenesis // inferred from mutant phenotype	---	---	---
1420385_at	0.000867354	0.338835	5.9477	6.3249	6.00408	A	A	A	7.42661	7.86727	7.66267	P	P	P	1420385_at	Gna14	guanine nucleotide binding protein, alpha 14	NM_008137 /// XM_006526689	14675	ENSMUSG00000024697	chr19	16435761	16610820	+	0006184 // GTP catabolic process // not recorded /// 0007165 // signal transduction // inferred from electronic annotation /// 0007186 // G-protein coupled receptor signaling pathway // not recorded /// 0007188 // adenylate cyclase-modulating G-protein coupled receptor signaling pathway // not recorded /// 0060158 // phospholipase C-activating dopamine receptor signaling pathway // not recorded	0005834 // heterotrimeric G-protein complex // not recorded /// 0031234 // extrinsic component of cytoplasmic side of plasma membrane // not recorded	0000166 // nucleotide binding // inferred from electronic annotation /// 0001664 // G-protein coupled receptor binding // not recorded /// 0003924 // GTPase activity // not recorded /// 0004871 // signal transducer activity // not recorded /// 0005525 // GTP binding // inferred from electronic annotation /// 0019001 // guanyl nucleotide binding // inferred from electronic annotation /// 0031683 /…	G_Protein_Signaling // GenMAPP
1420386_at	0.0139547	2.22519	8.54265	7.87894	8.15071	P	P	P	6.87017	7.19551	7.10353	P	P	P	1420386_at	Seh1l	SEH1-like (S. cerevisiae	NM_001039088 /// NM_028112 /// XM_006526278	72124	---	chr18	67774974	67792595	+	0002534 // cytokine production involved in inflammatory response // inferred from mutant phenotype /// 0006810 // transport // inferred from electronic annotation /// 0006999 // nuclear pore organization // not recorded /// 0007049 // cell cycle // inferred from electronic annotation /// 0007059 // chromosome segregation // inferred from electronic annotation /// 0007067 // mitotic nuclear divisi…	0000775 // chromosome, centromeric region // inferred from electronic annotation /// 0000776 // kinetochore // not recorded /// 0000777 // condensed chromosome kinetochore // inferred from electronic annotation /// 0005634 // nucleus // inferred from electronic annotation /// 0005643 // nuclear pore // inferred from electronic annotation /// 0005694 // chromosome // inferred from electronic annot…	---	---
1420395_a_at	0.019953	0.438005	5.95258	6.17587	5.45215	A	A	A	7.01569	6.98821	7.22925	P	P	P	1420395_a_at	Kif9	kinesin family member 9	NM_001163569 /// NM_010628 /// XM_006511941 /// XM_006511942 /// XM_006511943 /// XM_006511944 /// XM_006511945	16578	ENSMUSG00000032489 /// OTTMUSG00000021051	chr9	110476993	110525174	+	0007018 // microtubule-based movement // inferred from electronic annotation /// 0008152 // metabolic process // inferred from electronic annotation	0002102 // podosome // not recorded /// 0005737 // cytoplasm // inferred from electronic annotation /// 0005829 // cytosol // traceable author statement /// 0005856 // cytoskeleton // inferred from electronic annotation /// 0005871 // kinesin complex // inferred from electronic annotation /// 0005874 // microtubule // not recorded /// 0031982 // vesicle // not recorded	0000166 // nucleotide binding // inferred from electronic annotation /// 0003777 // microtubule motor activity // inferred from electronic annotation /// 0005515 // protein binding // inferred from electronic annotation /// 0005524 // ATP binding // inferred from electronic annotation /// 0008017 // microtubule binding // inferred from electronic annotation /// 0046983 // protein dimerization act…	---
1420406_at	0.0347467	2.45569	4.49179	4.45695	4.95093	P	M	P	2.65194	3.52878	3.68636	A	A	A	1420406_at	Peg12	paternally expressed 12	NM_013788	27412	ENSMUSG00000070526	chr7	62461870	62464510	-	0000578 // embryonic axis specification // inferred from direct assay /// 0016055 // Wnt signaling pathway // inferred from genetic interaction	---	---	---
1420411_a_at	0.0106802	2.78681	9.29127	8.82753	9.62399	P	P	P	7.72179	8.04076	7.61877	P	P	P	1420411_a_at	Pi4k2b	phosphatidylinositol 4-kinase type 2 beta	NM_025951 /// NM_028744 /// XM_006504064	67073	ENSMUSG00000029186 /// OTTMUSG00000023351	chr5	52741607	52768286	+	0016310 // phosphorylation // inferred from electronic annotation /// 0046854 // phosphatidylinositol phosphorylation // inferred from electronic annotation	0005737 // cytoplasm // not recorded /// 0016020 // membrane // inferred from electronic annotation	0000166 // nucleotide binding // inferred from electronic annotation /// 0004430 // 1-phosphatidylinositol 4-kinase activity // inferred from electronic annotation /// 0005524 // ATP binding // inferred from electronic annotation /// 0016301 // kinase activity // inferred from electronic annotation /// 0016740 // transferase activity // inferred from electronic annotation /// 0016773 // phosphotr…	---
1420447_at	0.00582791	63.4952	8.8994	6.09254	7.79917	P	P	P	2.87104	0.804852	1.60417	A	A	A	1420447_at	Sult1e1	sulfotransferase family 1E, member 1	NM_023135	20860	ENSMUSG00000029272	chr5	87575969	87591611	-	0007565 // female pregnancy // inferred from mutant phenotype /// 0008210 // estrogen metabolic process // inferred from direct assay /// 0008210 // estrogen metabolic process // inferred from mutant phenotype /// 0008210 // estrogen metabolic process // not recorded /// 0051923 // sulfation // not recorded	0005634 // nucleus // inferred from electronic annotation /// 0005737 // cytoplasm // inferred from direct assay /// 0031965 // nuclear membrane // inferred from electronic annotation	0004304 // estrone sulfotransferase activity // inferred from electronic annotation /// 0005496 // steroid binding // inferred from electronic annotation /// 0008146 // sulfotransferase activity // inferred from electronic annotation /// 0008289 // lipid binding // inferred from electronic annotation /// 0016740 // transferase activity // inferred from electronic annotation /// 0047894 // flavono…	---
1420449_at	0.00592257	0.36423	5.35209	4.84503	4.66473	P	M	A	6.34682	6.70672	6.22577	P	P	P	1420449_at	Heatr5b	HEAT repeat containing 5B	NM_001081179 /// NM_028084 /// NM_177168 /// NM_177332	320473	---	chr17	78749016	78750798	-	---	---	0005515 // protein binding // inferred from physical interaction	---
1420450_at	0.0439164	15.0414	8.87971	6.72884	7.2384	P	P	P	5.10722	1.10962	3.5583	A	A	A	1420450_at	Mmp10	matrix metallopeptidase 10	NM_019471	17384	ENSMUSG00000047562	chr9	7502341	7510238	+	0006508 // proteolysis // inferred from electronic annotation /// 0030334 // regulation of cell migration // inferred from mutant phenotype /// 0030574 // collagen catabolic process // inferred from electronic annotation	0005576 // extracellular region // inferred from electronic annotation /// 0005578 // proteinaceous extracellular matrix // inferred from electronic annotation /// 0031012 // extracellular matrix // inferred from electronic annotation	0004222 // metalloendopeptidase activity // inferred from electronic annotation /// 0005509 // calcium ion binding // inferred from electronic annotation /// 0008233 // peptidase activity // inferred from electronic annotation /// 0008237 // metallopeptidase activity // inferred from electronic annotation /// 0008270 // zinc ion binding // inferred from electronic annotation /// 0016787 // hydrol…	Matrix_Metalloproteinases // GenMAPP
1420476_a_at	0.0301319	2.14045	12.7532	12.4	11.9943	P	P	P	11.2938	11.4447	11.2037	P	P	P	1420476_a_at	Nap1l1	nucleosome assembly protein 1-like 1	NM_001146707 /// NM_015781 /// XM_006513890 /// XM_006513891 /// XM_006513892 /// XM_006513893	53605	ENSMUSG00000058799 /// ENSMUSG00000079139	chr10	111473219	111498150	+	0006334 // nucleosome assembly // inferred from electronic annotation	0005634 // nucleus // inferred from electronic annotation /// 0042470 // melanosome // inferred from electronic annotation	0005515 // protein binding // inferred from physical interaction /// 0044822 // poly(A) RNA binding // not recorded	---
1420479_a_at	0.034803	2.56484	12.0505	11.2854	10.9604	P	P	P	9.8606	10.5046	9.99644	P	P	P	1420479_a_at	Nap1l1	nucleosome assembly protein 1-like 1	NM_001146707 /// NM_015781 /// XM_006513890 /// XM_006513891 /// XM_006513892 /// XM_006513893	53605	ENSMUSG00000058799 /// ENSMUSG00000079139	chr10	111473219	111498150	+	0006334 // nucleosome assembly // inferred from electronic annotation	0005634 // nucleus // inferred from electronic annotation /// 0042470 // melanosome // inferred from electronic annotation	0005515 // protein binding // inferred from physical interaction /// 0044822 // poly(A) RNA binding // not recorded	---
1420484_a_at	0.0178232	0.399331	4.41446	3.53881	3.7937	P	A	A	5.04885	5.55006	5.2203	P	P	P	1420484_a_at	Vtn	vitronectin	NM_011707	22370	ENSMUSG00000017344 /// OTTMUSG00000000143	chr11	78499296	78502323	+	0006898 // receptor-mediated endocytosis // inferred from electronic annotation /// 0006955 // immune response // inferred from electronic annotation /// 0007155 // cell adhesion // inferred from electronic annotation /// 0007160 // cell-matrix adhesion // inferred from direct assay /// 0007160 // cell-matrix adhesion // not recorded /// 0010811 // positive regulation of cell-substrate adhesion /…	0005576 // extracellular region // inferred from electronic annotation /// 0005578 // proteinaceous extracellular matrix // inferred from direct assay /// 0005615 // extracellular space // not recorded /// 0031012 // extracellular matrix // not recorded /// 0070062 // extracellular vesicular exosome // not recorded /// 0072562 // blood microparticle // not recorded	0005044 // scavenger receptor activity // inferred from electronic annotation /// 0005178 // integrin binding // not recorded /// 0005515 // protein binding // inferred from electronic annotation /// 0008201 // heparin binding // inferred from electronic annotation /// 0030247 // polysaccharide binding // inferred from electronic annotation /// 0050840 // extracellular matrix binding // inferred …	Inflammatory_Response_Pathway // GenMAPP
1420499_at	0.00341129	9.29877	9.289	9.41689	9.4735	P	P	P	5.77141	6.56441	6.0868	P	P	A	1420499_at	Gch1	GTP cyclohydrolase 1	NM_008102	14528	ENSMUSG00000037580	chr14	47153895	47189437	-	0006184 // GTP catabolic process // not recorded /// 0006461 // protein complex assembly // not recorded /// 0006729 // tetrahydrobiopterin biosynthetic process // inferred by curator /// 0006729 // tetrahydrobiopterin biosynthetic process // not recorded /// 0008152 // metabolic process // not recorded /// 0008217 // regulation of blood pressure // inferred from mutant phenotype /// 0008217 // r…	0005634 // nucleus // not recorded /// 0005737 // cytoplasm // not recorded /// 0005829 // cytosol // not recorded /// 0031410 // cytoplasmic vesicle // not recorded /// 0031965 // nuclear membrane // not recorded /// 0043234 // protein complex // not recorded	0000166 // nucleotide binding // inferred from electronic annotation /// 0003824 // catalytic activity // inferred from electronic annotation /// 0003934 // GTP cyclohydrolase I activity // inferred from direct assay /// 0003934 // GTP cyclohydrolase I activity // not recorded /// 0005509 // calcium ion binding // not recorded /// 0005515 // protein binding // inferred from electronic annotation …	---
1420540_a_at	0.0285694	2.07123	9.86667	9.9502	10.4654	P	P	P	9.03749	9.13419	9.03227	P	P	P	1420540_a_at	Rit1	Ras-like without CAAX 1	NM_001163310 /// NM_009069 /// NR_028056 /// XM_006501158 /// XM_006501159 /// XM_006501160	19769	ENSMUSG00000028057 /// OTTMUSG00000035185	chr3	88716863	88729727	+	0006184 // GTP catabolic process // inferred from electronic annotation /// 0006886 // intracellular protein transport // inferred from electronic annotation /// 0006913 // nucleocytoplasmic transport // inferred from electronic annotation /// 0007165 // signal transduction // inferred from electronic annotation /// 0007264 // small GTPase mediated signal transduction // inferred from electronic …	0005622 // intracellular // not recorded /// 0005886 // plasma membrane // inferred from direct assay /// 0016020 // membrane // inferred from electronic annotation	0000166 // nucleotide binding // inferred from electronic annotation /// 0003924 // GTPase activity // inferred from electronic annotation /// 0005515 // protein binding // inferred from physical interaction /// 0005525 // GTP binding // inferred from direct assay	---
1420564_at	0.0077921	0.27981	5.62867	5.14091	5.73194	P	P	A	6.88616	7.81747	7.21915	P	P	P	1420564_at	Insrr	insulin receptor-related receptor	NM_011832 /// XM_006501451 /// XM_006501452 /// XM_006501453 /// XM_006501454	23920	ENSMUSG00000005640 /// OTTMUSG00000035156	chr3	87796964	87816101	+	0006468 // protein phosphorylation // inferred from electronic annotation /// 0007165 // signal transduction // not recorded /// 0007169 // transmembrane receptor protein tyrosine kinase signaling pathway // inferred from electronic annotation /// 0016310 // phosphorylation // inferred from electronic annotation /// 0018108 // peptidyl-tyrosine phosphorylation // not recorded /// 0030238 // male …	0005887 // integral component of plasma membrane // inferred from electronic annotation /// 0016020 // membrane // inferred from electronic annotation /// 0016021 // integral component of membrane // inferred from electronic annotation /// 0043235 // receptor complex // not recorded	0000166 // nucleotide binding // inferred from electronic annotation /// 0004672 // protein kinase activity // inferred from electronic annotation /// 0004713 // protein tyrosine kinase activity // inferred from electronic annotation /// 0004714 // transmembrane receptor protein tyrosine kinase activity // not recorded /// 0005515 // protein binding // inferred from electronic annotation /// 0005…	---
1420631_a_at	0.00641613	2.03098	11.0972	10.6859	10.7835	P	P	P	9.7809	9.79057	9.95455	P	P	P	1420631_a_at	Blcap	bladder cancer associated protein homolog (human)	NM_016916 /// XM_006499900	53619	ENSMUSG00000067787 /// OTTMUSG00000016195	chr2	157556362	157558330	-	0006915 // apoptotic process // inferred from electronic annotation /// 0007049 // cell cycle // inferred from electronic annotation /// 0030262 // apoptotic nuclear changes // not recorded	0016020 // membrane // inferred from electronic annotation /// 0016021 // integral component of membrane // inferred from electronic annotation	0005515 // protein binding // inferred from electronic annotation	---
1420647_a_at	0.000273563	3.82	14.149	13.8903	14.2886	P	P	P	12.3849	12.0188	12.1265	P	P	P	1420647_a_at	Krt8	keratin 8	NM_031170	16691	ENSMUSG00000049382	chr15	101996710	102004283	-	0000904 // cell morphogenesis involved in differentiation // traceable author statement /// 0007275 // multicellular organismal development // traceable author statement /// 0033209 // tumor necrosis factor-mediated signaling pathway // inferred from genetic interaction /// 0033209 // tumor necrosis factor-mediated signaling pathway // inferred from mutant phenotype /// 0045214 // sarcomere organ…	0005634 // nucleus // not recorded /// 0005654 // nucleoplasm // inferred from electronic annotation /// 0005737 // cytoplasm // not recorded /// 0005882 // intermediate filament // inferred from direct assay /// 0005882 // intermediate filament // not recorded /// 0005911 // cell-cell junction // inferred from direct assay /// 0016010 // dystrophin-associated glycoprotein complex // not recorded…	0005198 // structural molecule activity // inferred from electronic annotation /// 0005515 // protein binding // inferred from physical interaction /// 0032403 // protein complex binding // not recorded /// 0097110 // scaffold protein binding // not recorded	Smooth_muscle_contraction // GenMAPP
1420651_at	0.031871	2.12065	8.1582	7.29602	7.63142	P	P	P	6.37613	6.45716	7.03773	P	P	P	1420651_at	Ate1	arginyltransferase 1	NM_001029895 /// NM_001136054 /// NM_001271343 /// NM_013799 /// XM_006507264 /// XM_006507265 /// XM_006507266 /// XM_006507267	11907	ENSMUSG00000030850	chr7	130393485	130519524	-	0016598 // protein arginylation // inferred from direct assay	0005634 // nucleus // inferred from direct assay /// 0005634 // nucleus // not recorded /// 0005737 // cytoplasm // inferred from direct assay /// 0005737 // cytoplasm // not recorded	0004057 // arginyltransferase activity // inferred from direct assay /// 0005515 // protein binding // inferred from electronic annotation /// 0016740 // transferase activity // inferred from electronic annotation /// 0016746 // transferase activity, transferring acyl groups // inferred from electronic annotation	---
1420664_s_at	0.0371133	5.89966	10.1596	8.32719	8.3478	P	P	P	7.28968	6.45781	5.88691	P	P	P	1420664_s_at	Procr	protein C receptor, endothelial	NM_011171 /// XM_006498955	19124	ENSMUSG00000027611 /// OTTMUSG00000016132	chr2	155751262	155755460	+	0006955 // immune response // inferred from electronic annotation /// 0007596 // blood coagulation // inferred from electronic annotation /// 0007599 // hemostasis // inferred from electronic annotation /// 0019882 // antigen processing and presentation // inferred from electronic annotation /// 0050819 // negative regulation of coagulation // not recorded /// 0050819 // negative regulation of co…	0005813 // centrosome // inferred from direct assay /// 0016020 // membrane // inferred from electronic annotation /// 0016021 // integral component of membrane // inferred from electronic annotation	0005515 // protein binding // inferred from electronic annotation /// 0008022 // protein C-terminus binding // inferred from sequence or structural similarity	---
1420672_at	0.0330966	0.480801	6.44899	6.67318	6.71548	P	P	P	8.01102	7.67506	7.23076	P	P	P	1420672_at	Kcne1	potassium voltage-gated channel, Isk-related subfamily, member 1	NM_008424 /// XM_006522941	16509	ENSMUSG00000039639	chr16	92348280	92359468	-	0002070 // epithelial cell maturation // inferred from mutant phenotype /// 0006487 // protein N-linked glycosylation // inferred from electronic annotation /// 0006487 // protein N-linked glycosylation // inferred from sequence or structural similarity /// 0006493 // protein O-linked glycosylation // inferred from electronic annotation /// 0006493 // protein O-linked glycosylation // inferred fr…	0005764 // lysosome // inferred from electronic annotation /// 0005783 // endoplasmic reticulum // not recorded /// 0005794 // Golgi apparatus // not recorded /// 0005886 // plasma membrane // inferred from electronic annotation /// 0008076 // voltage-gated potassium channel complex // not recorded /// 0009986 // cell surface // inferred from electronic annotation /// 0016020 // membrane // infer…	0005244 // voltage-gated ion channel activity // inferred from electronic annotation /// 0005249 // voltage-gated potassium channel activity // not recorded /// 0005251 // delayed rectifier potassium channel activity // not recorded /// 0005267 // potassium channel activity // inferred from electronic annotation /// 0005515 // protein binding // inferred from electronic annotation /// 0015459 // …	---
1420673_a_at	0.0018308	0.323364	9.42674	9.81412	9.97451	P	P	P	11.5617	11.1614	11.4042	P	P	P	1420673_a_at	Acox2	acyl-Coenzyme A oxidase 2, branched chain	NM_001161667 /// NM_053115 /// XM_006518108 /// XM_006518109	93732	ENSMUSG00000021751 /// OTTMUSG00000035513	chr14	8225510	8259325	-	0006629 // lipid metabolic process // inferred from electronic annotation /// 0006631 // fatty acid metabolic process // inferred from electronic annotation /// 0006635 // fatty acid beta-oxidation // not recorded /// 0008152 // metabolic process // inferred from electronic annotation /// 0055114 // oxidation-reduction process // inferred from electronic annotation	0005777 // peroxisome // not recorded	0003995 // acyl-CoA dehydrogenase activity // inferred from electronic annotation /// 0003997 // acyl-CoA oxidase activity // inferred from electronic annotation /// 0005102 // receptor binding // not recorded /// 0005504 // fatty acid binding // not recorded /// 0016491 // oxidoreductase activity // inferred from electronic annotation /// 0016627 // oxidoreductase activity, acting on the CH-CH g…	---
1420696_at	0.00708023	3.44448	10.33	9.864	9.81588	P	P	P	8.2778	8.18102	8.25419	P	P	P	1420696_at	Sema3c	sema domain, immunoglobulin domain (Ig), short basic domain, secreted, (semaphorin) 3C	NM_013657	20348	ENSMUSG00000028780 /// OTTMUSG00000035305	chr5	17574616	17727987	+	0001755 // neural crest cell migration // inferred from mutant phenotype /// 0001756 // somitogenesis // inferred from expression pattern /// 0001974 // blood vessel remodeling // inferred from mutant phenotype /// 0003151 // outflow tract morphogenesis // inferred from expression pattern /// 0003215 // cardiac right ventricle morphogenesis // inferred from expression pattern /// 0003350 // pulmo…	0005576 // extracellular region // inferred from electronic annotation /// 0005615 // extracellular space // inferred from direct assay /// 0016020 // membrane // inferred from electronic annotation	0004872 // receptor activity // inferred from electronic annotation /// 0005515 // protein binding // inferred from electronic annotation /// 0030215 // semaphorin receptor binding // inferred from physical interaction	---
1420731_a_at	0.0429924	0.424477	10.8078	10.711	11.7754	P	P	P	12.114	12.7018	12.3814	P	P	P	1420731_a_at	Csrp2	cysteine and glycine-rich protein 2	NM_007792	13008	ENSMUSG00000020186	chr10	110920188	110939494	+	0007275 // multicellular organismal development // inferred from electronic annotation /// 0030154 // cell differentiation // inferred from electronic annotation	0005634 // nucleus // not recorded	0005515 // protein binding // inferred from physical interaction /// 0008270 // zinc ion binding // inferred from electronic annotation /// 0046872 // metal ion binding // inferred from electronic annotation	---
1420786_a_at	0.00521527	8.3655	8.52245	7.43013	7.77364	P	P	P	4.90197	5.13672	4.68098	A	P	A	1420786_a_at	Gm10256 /// Gm10352 /// Gm21677 /// Gm21693 /// Gm21704 /// Gm21708 /// Gm4064 /// Rbmy	predicted gene 10256 /// predicted gene 10352 /// predicted gene, 21677 /// predicted gene, 21693 /// predicted gene, 21704 /// predicted gene, 21708 /// predicted gene 4064 /// RNA binding motif protein, Y chromosome	NM_001166384 /// NM_001270510 /// NM_001270511 /// NM_001270513 /// NM_001270514 /// NM_001270515 /// NM_001270516 /// NM_001270518 /// NM_011253 /// XM_006531575 /// XM_006531576 /// XM_006531577 /// XM_006536341 /// XM_006536342 /// XM_006536343 /// XM_006536344 /// XM_006536345 /// XM_006536346 /// XM_006536347 /// XM_006536348 /// XM_006536349 /// XM_006536350	19657 /// 100042849 /// 100042874 /// 100042881 /// 100862365 /// 100862383 /// 100862394 /// 100862398	ENSMUSG00000091987 /// ENSMUSG00000093987 /// ENSMUSG00000094658 /// ENSMUSG00000095852	chrY	2830698	2841849	+	0002244 // hematopoietic progenitor cell differentiation // inferred from mutant phenotype /// 0006397 // mRNA processing // inferred from electronic annotation /// 0008380 // RNA splicing // inferred from electronic annotation	0005634 // nucleus // inferred from direct assay	0000166 // nucleotide binding // inferred from electronic annotation /// 0003676 // nucleic acid binding // inferred from electronic annotation /// 0003723 // RNA binding // inferred from electronic annotation	mRNA_processing_binding_Reactome // GenMAPP
1420804_s_at	0.00079811	11.7765	8.33742	7.5362	7.95341	P	P	P	4.93459	4.12803	4.0187	A	A	A	1420804_s_at	Clec4d	C-type lectin domain family 4, member d	NM_001163161 /// NM_010819	17474	ENSMUSG00000030144	chr6	123262174	123274918	+	0002376 // immune system process // inferred from electronic annotation /// 0045087 // innate immune response // inferred from electronic annotation	0016020 // membrane // inferred from electronic annotation /// 0016021 // integral component of membrane // inferred from electronic annotation	0030246 // carbohydrate binding // inferred from electronic annotation	---
1420817_at	0.0485853	2.11366	11.7346	11.4458	10.8315	P	P	P	10.4668	10.2583	10.1727	P	P	P	1420817_at	Ywhag	tyrosine 3-monooxygenase/tryptophan 5-monooxygenase activation protein, gamma polypeptide	NM_018871	22628	ENSMUSG00000051391 /// OTTMUSG00000016297	chr5	135908408	135934628	-	0006605 // protein targeting // inferred from direct assay /// 0032869 // cellular response to insulin stimulus // not recorded /// 0045664 // regulation of neuron differentiation // not recorded /// 0048167 // regulation of synaptic plasticity // not recorded /// 0055114 // oxidation-reduction process // inferred from electronic annotation	0005622 // intracellular // inferred from direct assay /// 0005623 // cell // inferred from direct assay /// 0005737 // cytoplasm // inferred from electronic annotation /// 0005829 // cytosol // traceable author statement /// 0030659 // cytoplasmic vesicle membrane // traceable author statement /// 0031988 // membrane-bounded vesicle // not recorded /// 0070062 // extracellular vesicular exosome …	0003779 // actin binding // inferred from sequence or structural similarity /// 0004497 // monooxygenase activity // inferred from electronic annotation /// 0005080 // protein kinase C binding // not recorded /// 0005159 // insulin-like growth factor receptor binding // not recorded /// 0005515 // protein binding // inferred from physical interaction /// 0016491 // oxidoreductase activity // infe…	---
[truncated: 1,866 more rows]
