# Supplementary material for: Corin Is Downregulated in Renal Ischemia/Reperfusion Injury and Is Associated with Delayed Graft Function after Kidney Transplantation
Source: Dis Markers. 2019 Jan 14;2019:9429323. doi: 10.1155/2019/9429323 (PMC6350528; doi:10.1155/2019/9429323)
Supplement: Supplementary Materials — Original data of microarray are available in Supplementary Material 1, and some clinical characteristics for individuals are available in Supplementary Material 2. [file 9429323.f1.zip › Supplementary Material 2.xlsx]

## Sheet: Sheet1
IGF patients ID	End-stage renal disease	Immunosuppression treatment	Use of glucocoticoid	DGF patients ID	End-stage renal disease	Immunosuppression treatment	Use of glucocoticoid
R001	Unknown	Mycophenolate mofetil+Tacrolimus	Methylprednisolone+ Prednisone	R007	Unknown	Mycophenolate mofetil +Tacrolimus	Methylprednisolone+ Prednisone
R002	Unknown	Mycophenolate Sodium+Tacrolimus	Methylprednisolone+ Prednisone	R008	Unknown	Mycophenolate mofetil+Tacrolimus	Methylprednisolone+ Prednisone
R003	Unknown	Mycophenolate Sodium+Tacrolimus	Methylprednisolone+ Prednisone	R010	Unknown	Mycophenolate Sodium+Tacrolimus	Methylprednisolone+ Prednisone
R005	Polycystic kidney disease	Mycophenolate mofetil+Tacrolimus	Methylprednisolone+ Prednisone	R011	Hemorrhagic shock	Mycophenolate mofetil+Sandimmun Neoral	Methylprednisolone+ Prednisone
R006	Chronic glomerulonephritis	Mycophenolate mofetil+Tacrolimus	Methylprednisolone+ Prednisone	R012	Crescentic nephropathy	Mycophenolate mofetil +Tacrolimus	Methylprednisolone+ Prednisone
R009	Unknown	Mycophenolate mofetil +Tacrolimus	Methylprednisolone+ Prednisone	R013	Unknown	Mycophenolate mofetil+Tacrolimus	Methylprednisolone+ Prednisone
R018	Unknown	Mycophenolate Sodium+Tacrolimus	Methylprednisolone+ Prednisone	R015	Unknown	Mycophenolate Sodium+Tacrolimus	Methylprednisolone+ Prednisone
R019	Unknown	Mycophenolate Sodium+Tacrolimus	Methylprednisolone+ Prednisone	R016	Unknown	Mycophenolate mofetil+Sandimmun Neoral	Methylprednisolone+ Prednisone
R020	IgA nephropathy	Mycophenolate mofetil +Tacrolimus	Methylprednisolone+ Prednisone	R032	Unknown	Mycophenolate mofetil+Tacrolimus	Methylprednisolone+ Prednisone
R021	Unknown	Mycophenolate mofetil+Tacrolimus	Methylprednisolone+ Prednisone	R033	Hemorrhagic shock	Mycophenolate Sodium+Tacrolimus	Methylprednisolone+ Prednisone
R022	Unknown	Mycophenolate mofetil +Sandimmun Neoral	Methylprednisolone+ Prednisone	R038	Unknown	Mycophenolate Sodium+Sandimmun Neoral	Methylprednisolone+ Prednisone
R023	Unknown	Mycophenolate Sodium+Tacrolimus	Methylprednisolone+ Prednisone
R024	Unknown	Mycophenolate mofetil+Tacrolimus	Methylprednisolone+ Prednisone
R025	IgA nephropathy	Sirolimus+Tacrolimus	Methylprednisolone+ Prednisone
R026	Unknown	Mycophenolate Sodium+Tacrolimus	Methylprednisolone+ Prednisone
R027	Unknown	Mycophenolate mofetil +Tacrolimus	Methylprednisolone+ Prednisone
